# Supplementary material for: Elucidating the evolutionary conserved DNA-binding specificities of WRKY transcription factors by molecular dynamics and in vitro binding assays
Source: PubMed Central journal article supplement — Nucleic Acids Res. 2013 Aug 23;41(21):9764–78. doi: 10.1093/nar/gkt732 (PMC3834811; doi:10.1093/nar/gkt732), 2013-08-23
Supplement: supp_gkt732_nar-00164-f-2013-File009.pdf [file supp_gkt732_nar-00164-f-2013-File009.pdf]

## Supplementary Files

|                        |                                                              |       |
|------------------------|--------------------------------------------------------------|-------|
| Supplementary Figure 1 | Phylogram of WRKY DNA binding domains                        | p. 2  |
| Supplementary Table 1  | WRKY protein sequences used for phylogenetic analyses        | p. 4  |
| Supplementary Table 2  | AtWRKY protein sequences used for homology modeling          | p. 17 |
| Supplementary Figure 2 | AtWRKY1 cDBD - DNA binding interface                         | p. 18 |
| Supplementary Table 3  | Sites of close proximity during MD studies                   | p. 19 |
| Supplementary Table 4  | DNA sequences of AtWRKY used for protein expression          | p. 23 |
| Supplementary Table 5  | Raw absorbance values of DPI-ELISA screens                   | p. 24 |
| Supplementary Figure 3 | S-plot diagrams of all four DPI-ELISA screens                | p. 28 |
| Supplementary Table 6  | Relative binding values of DPI-ELISA screens                 | p. 30 |
| Supplementary Table 7  | Alignment of positive DNA probes of DPI-ELISA screen         | p. 36 |
| Supplementary Table 8  | Alignment of WRKY DBDs to identify conserved proximity sites | p. 42 |
| Supplementary Figure 4 | Comparison of models for WRKY DBD-DNA interaction sites      | p. 48 |

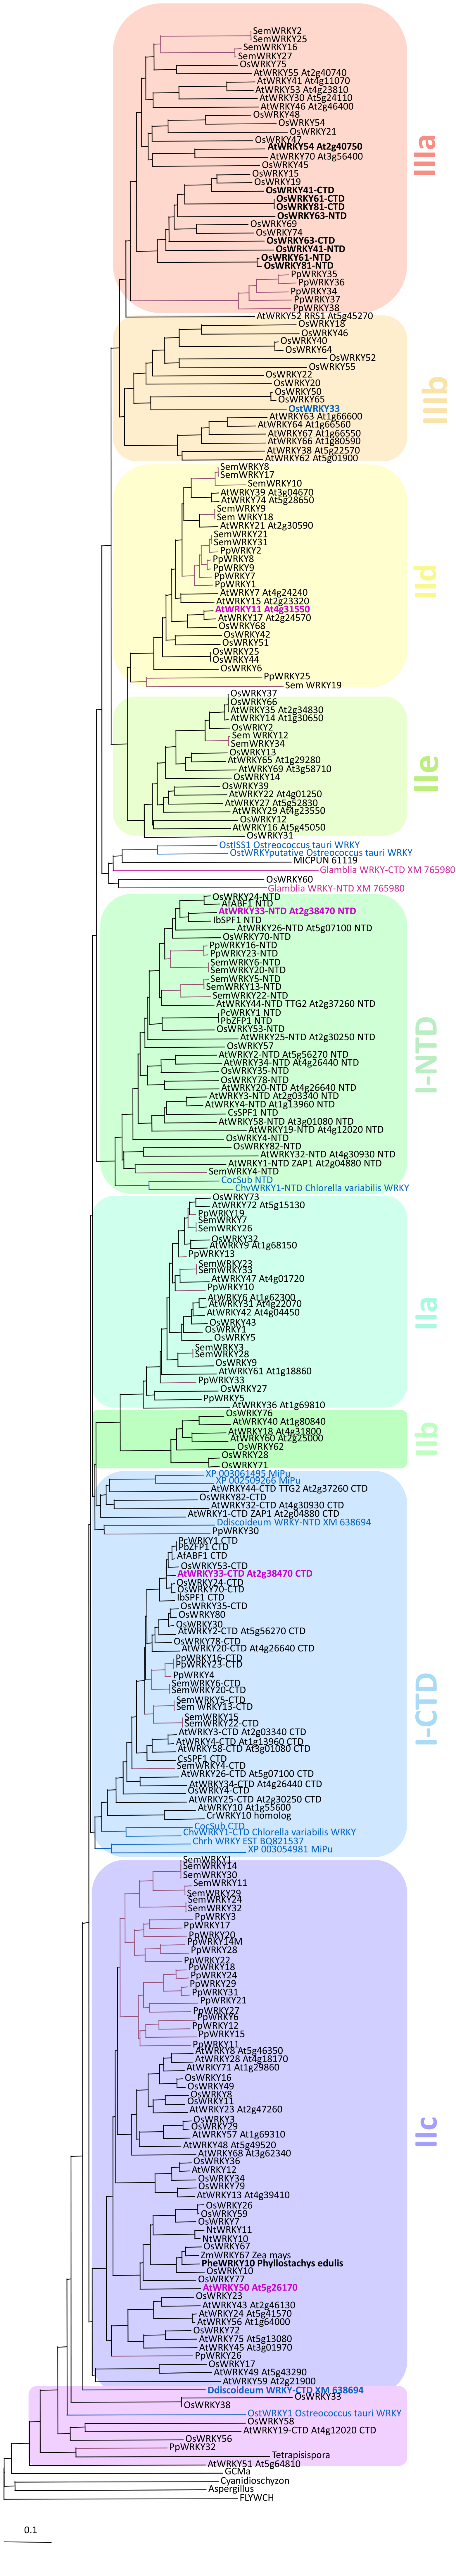

**Supplementary Figure 1|** Phylogram of WRKY DNA binding domains.

Phylogenetic tree based on all WRKY\_GCM1-like domains contained in Supplementary Table 1. The Phylogram was rooted with their zinc finger-like domain of Homo sapiens FLYWCH (*HsFLYWCH*) as an out-group.

Tree topology has been confirmed by using three different programs. Groups and subgroups of WRKY I to III are color coded.

Supplementary Table 1| WRKY protein sequences used for phylogenetic analyses.

|                                                                           |
|---------------------------------------------------------------------------|
| >OsWRKY1                                                                  |
| SEAPIIADGCQWRKYGQKMAKGNPCPRAYYRCTMATGCPVRKQVQRCAEDRSILITTYEGTHNHPLP       |
| >OsWRKY2                                                                  |
| GGEVVPDDLWAWRKYGQKPIKGSPPYPRGYRCSSSKGC SARKQVERSRADPTMLVVVITYTSDHNHPWP    |
| >OsWRKY3                                                                  |
| SEIDHLEDGYRWRKYGQKAVKNSPFPRSYRCTNSKCTVKKRVERSDDPSVVIITTYEGQHCHHTAS        |
| >OsWRKY4-NTD                                                              |
| AIEQPAKDGYNWRKYGQKQLKDAESPRSYKCTR DGCPVKKIVERSSDGCIKEITYKGRHSHPRP         |
| >OsWRKY4-CTD                                                              |
| SEVDLDDGYRWRKYGQKVVGKGNRPRSYKCTADGCNVRKQIERASADPKCVLTTTYTGRHNHDP          |
| >OsWRKY5                                                                  |
| SEAPMISDGCQWRKYGQKMAKGNPCPRAYYRCTMASQCPVRKQVQRCAKDKSILITTYEGTHSHPLP       |
| >OsWRKY6                                                                  |
| KVADIPSDNYSWRKYGQKPIKGSPPHPRGYRCS SKKDCPARKHVERCRSDPAMLLVITYENEHNHAQP     |
| >OsWRKY7                                                                  |
| SEIEILDGKYKWRKYGKKS VKNSPNRNYRCS TE GCVKVRVERDKDDPSYVVTTYEGTHNHVSPS       |
| >OsWRKY8                                                                  |
| SEVDHLEDGYRWRKYGQKAVKNSSYPRSYRCTAPRCGVKVRVERSEQDPSMVIITTYEGQHTHPSP        |
| >OsWRKY9                                                                  |
| KPRVSI SDGCQWRKYGQKMAKGNPCPRAYYRCTMAIGCPVRKQVQRCAEDKTVLITTYEGNHNHQLP      |
| >OsWRKY10                                                                 |
| SEVEVLDDGFKWRKYGKKA VKSSPNRNYRCSAAGCGVKKRVERDGD DPRYVVTTYDGVHNHATP        |
| >OsWRKY11                                                                 |
| SEVDHLEDGYRWRKYGQKAVKNSPYPRSYRCTTPKCGVKKRVERSYQDPSTVIITTYEGQHTHHSP        |
| >OsWRKY12                                                                 |
| ADGGVSSDLWAWRKYGQKPIKGSPPYPRGYKCS SSMKGC MARKMVERSPAKPGMLVVITYMAEHCHPVP   |
| >OsWRKY13                                                                 |
| GEGPPSDSWAWRKYGQKPIKGSPPYPRGYRCS SSKGCPARKQVERSRADPTVLLVITYSFEHNHPWP      |
| >OsWRKY14                                                                 |
| GEGNTP TDSWAWRKYGQKPIKGSPPYPRAYYRCS SSKGCPARKQVERSRNDPDTVIIVITYSFEHNHSAT  |
| >OsWRKY15                                                                 |
| QDVGPLDDGFSWRKYGQKDILGAKYPRAYFRCTHRHTQGCHASKQVQRADGDP LLFDVVYHGDHTCAHG    |
| >OsWRKY16                                                                 |
| SEVDHLEDGYRWRKYGQKAVKNSPYPRSYRCTTQKCPVKKRVERSYQDPAVVIITTYEGKHTHP IP       |
| >OsWRKY17                                                                 |
| NNGGLADDGYKWRKYGQKSIKNSPNRPSYRCTNPRCNAKKQVERAVDEPDTLIVTYEGLHLHYTY         |
| >OsWRKY18                                                                 |
| LTPIPHTDGH LWRKYGEKKIKNSSFPRLYYRCSYRDDRNCMATKV VQQENDADPPLYRVITYIHPHTCNPS |
| >OsWRKY19                                                                 |
| QDTASLDDGLSWRKYGQKDILGAKYPRAYFRCTHRHTQGCNATKQVQRADGDP LLFDVVYLGDHTCGQA    |
| >OsWRKY20                                                                 |
| ITPSPYKDG YQWRKYGQKNIQDSNYLRLYFKCTFSRERSCAAKKQVQRDAGEPPMFLVITYLNEHTCQQP   |
| >OsWRKY21                                                                 |
| VRSGTTTDGFIWRKYGQKEINGCKHPRLYRCAFRGQGLATRRVQQSQSQDDPAAAFVIAIYYGEHTCGGD    |
| >OsWRKY22                                                                 |
| YTYAPYHDGYQWRKYGQKMIRGNSFPRCYRCTYHQDHGCPASKHVEQHNS EDPPLFRVIYTNEHTCGTS    |



>OsWRKY23  
SDNDILDDGYRWRKYGQKAVKNSKHPRSYRCTHHTCNVKKQVQRLAKDTSIVVTTYEGVHNHPCEKL

>OsWRKY24-NTD  
SQRRSSDDGYNWRKYGQKQVKGSENPRSYKCTFPNCPTKKKVERS LDGQITEIVYKGTHNHAKP

>OsWRKY24-CTD  
SDIDILDDGYRWRKYGQKVVKGNPNPRSYKCTTAGCPVRKHVERASHDLRAVITTYEGKHNHDVP

>OsWRKY25  
RVADIPADEYSWRKYGQKPIKGSYPYRGGYRSTVKGCPARKHVERAADDPATLVVTTYEGDHRHSP

>OsWRKY26  
SDDEILDDGYKWRKYGKKS VKNSPNRNYRSTEGCNVKKRVERDKNDPRYVVTMYEGIHNVCP

>OsWRKY27  
CSAPTVDKGCQWRKYGQKTAKGNPWPRGYRCTGAPGCPVKKQVQRCNHDTSVLVTTYDGVHNHPIT

>OsWRKY28  
DLSLVVKDGYQWRKYGQKVTKDNPCPRAYFRCSFAPACPVKKKQVRSADDNTVLVATYEGEHNHAQP

>OsWRKY29  
SEIDHLEDGYRWRKYGQKAVKNSPFPRSYRCTNSKCTVKKRVERS SDDPSVITTYEGQSHHTV

>OsWRKY30  
SEVDILDDGYRWRKYGQKVVKGNPNPRSYKCTHPGCSVRKHVERS SHDLKSVITTYEGKHNHEVP

>OsWRKY31  
AASGPAPDLWAWRKYGQKPIKGSYPYRGGYRCSNKNCAARKQVERCRFDPSFLLLTYTGAHSGHDVP

>OsWRKY32  
CQGPTMNDGCQWRKYGQKVAKGNPCPRAYRCTVAPGCPVKKQVQRCLEDMSILVTTYEGTHNHPLP

>OsWRKY33  
VNIDILDAGFRWRKYGQKVVKGNPNPSRGTTSPRCSPIPPAFTAANGAGAAFQRTKDKPRDDL FVESLLC

>OsWRKY34  
SEVDVLDDGYKWRKYGQKVVKNSLHPRSYFRCTHSNCRVKKRVERLSTDCRMVITTYEGRHTHSPC

>OsWRKY35-NTD  
AAAVAEDGYSWRKYGQKQVKHSEYPRSYKCTHASCAVKKKVERSHEGHVTEI IYKGNHHPKP

>OsWRKY35-CTD  
SEVDILDDGYRWRKYGQKVVKGNPNPSSSSMDADRSLVVVVVIRSYYKCTHPGCLVRKHVERASHDLKSV  
ITTYEGKHNHEVP

>OsWRKY36  
SDVDVLDDGYKWRKYGQKVVKNSLHPRSYRCTHNNCRVKKRVERLSEDCRMVITTYEGRHTHTPC

>OsWRKY37  
SGEVVPSDLWAWRKYGQKPIKGSYPYRGGYRCS SSKGCSARKQVERSRTDPNMLVITYTSEHNHPWP

>OsWRKY38  
INIDILDAGFRWRKYGQKVVKGNPNPRSYKCTTVGCPVRKHVERALHDTRAVITTYAGAVVQRDPVGS  
ANGAGAAFQRTKDKPRDDL FVESLLC

>OsWRKY39  
PADGVSADVWAWRKYGQKPIKGSYPYRGGYRCS SSKGCPARKQVERS RSDPNTFILTYTGEHNHSAP

>OsWRKY40  
ETPVPHYDGHQWRKYGQKH IKNKSKHPRSYRCTYRQE EKCKATKTVQQREDLHHANSYNGDHPIMYTVVYY  
GQHTCCKGP

>OsWRKY41-NTD  
KVSSTVEDGF SWVKYQKDILGTMYPRSYFRCIHRHTKGCLATKQVQPTDDHQILDVIYYGEHTCDQS

>OsWRKY41-CTD  
QDVGPLDDGYSWRRYGLKDILGAKYPRSYFRCTHRNTQGCVATKQIQRRDGDPLLFVYVYHGDHTCSER

>OsWRKY42  
RNADIPADDYSWRKYGQKPIKGSYPYRGGYKCTV RGC PARKHVERDPGEPAMLIVTYDGDHRHGEP

|                                                                               |
|-------------------------------------------------------------------------------|
| >OsWRKY43                                                                     |
| SDAPMISDGCQWRKYGQKMAKGNPCPRAYYRCTMAAGCPVRKQVQRCAEDRTLITTYEGNHNHPLP            |
| >OsWRKY44                                                                     |
| RVADIPADEYSWRKYGQKPIKGSPPYRGYYRCSTVKGCPARKHVERAADDPATLVVTTYEGDHRHSP           |
| >OsWRKY45                                                                     |
| VVVKNLDDGQAWRKYGQKEIQNSKHPKAYFRCTHKYDQMCTAQRQVQRCDDDPASVRYVTYIGEHTCRDP        |
| >OsWRKY46                                                                     |
| DTYAPYDDGHQWRKYGEKLLSNSNFPRCTYKNDMKCPATKQVQKDTNDPPLFSVTYFNHHTCNSS             |
| >OsWRKY47                                                                     |
| VTKLELEDGRQWRKYGQKHIQDSPNNPRSYRCTHRPDQGCMAKQVQTSSESNSSEFVLSYYGEHTCRDP         |
| >OsWRKY48                                                                     |
| EKARTSEDDGFLWRKYGQKEIKNSKHPRLYYRCSYKDDHGCTATKQVQQSEEDPSLYVITYFGDHTCSCQ        |
| >OsWRKY49                                                                     |
| SEVDHLEDGYRWRKYGQKAVKNSPFPRSYRCTTQKCPVKKRVERSYQDAAVVITTYEGKHTHP IP            |
| >OsWRKY50                                                                     |
| VTTVPDFDGYQWRKYGQKQIEGAMYPRSYRCTNSTNQGLAKKTVQRNGGGGAAGYTVAYISEHTCKSI          |
| >OsWRKY51                                                                     |
| KVADIPADDFSWRKYGQKPIKGSPPYRGYYKCTLRGCPARKHVERDPADPSMLIVTYEGEHRHTPS            |
| >OsWRKY52                                                                     |
| F'FPVPHEDGFQWRKYGEKKIQGTHFTSVNTQEDDGGVAMDS                                    |
| >OsWRKY53-NTD                                                                 |
| GGNNKLEDGYNWRKYGQKQVKGSENPRSYKCTYNGCSMKKKVERSLADGRITQIVYKGAHNHPKP             |
| >OsWRKY53-CTD                                                                 |
| SDIDILDDGFRWRKYGQKVVGKGNPNPRSYKCTTVGCPVRKHVERASHDTRAVITTYEGKHNHDVP            |
| >OsWRKY54                                                                     |
| ERKATMDDKFLWRKYGQKEIKNSKHPRFYRCSYKDDHGCTATKQVQQSETADDDTASPVYIITYFGEHTC<br>RHG |
| >OsWRKY55                                                                     |
| DTFAPHNDGHQWRKYGEKKINNCNFPRTNDQCQLTFFKRSTA                                    |
| >OsWRKY56                                                                     |
| CGGKMPADGYKWRKYGQKSIKNNPHPRCATRSIIDPI                                         |
| >OsWRKY57                                                                     |
| AKNSLSYDGYSWRKYGQKQVKGSEFPRSYKCTHTPTCPVKKRKMVEMTPDGRIAEIVYNGEHNHPKP           |
| >OsWRKY58                                                                     |
| SENDILDDGYRWRKYGQKAVKNSDFPSDELLEFSDVDNTQTATENLRFIPLGRVYITG                    |
| >OsWRKY59                                                                     |
| SDDEILDDGYKWRKYGKKSVMKNSPNPRNYRCSYKCTVGCNVKKRVERDKNDPRYVVTYEGIHNVCP           |
| >OsWRKY60                                                                     |
| VQLVMPEDGYEWKKGQKFIKNIQKNRSYFRCDQRCCGAKKKVEWHPHDPGLNLRVVYDGAHHHGSP            |
| >OsWRKY61-NTD                                                                 |
| RMSYTEDDGFQWRKYGQKQVKGSEFPRSYKCTHTPTCPVKKRKMVEMTPDGRIAEIVYNGEHNHPKP<br>GV     |
| >OsWRKY61-CTD                                                                 |
| KDVGPDDGYSWKRYGQKNIFGANYPYRCSYKCTHTPTCPVKKRKMVEMTPDGRIAEIVYNGEHNHPKP<br>GV    |
| >OsWRKY62                                                                     |
| SMAETVKDGYQWRKYGQKVTRDNPYPYRCSYKCTHTPTCPVKKRKMVEMTPDGRIAEIVYNGEHNHPKP<br>GV   |
| >OsWRKY63-NTD                                                                 |
| VRSNTEDDGLSWSKYEQKEILGAKFPYRCSYKCTHTPTCPVKKRKMVEMTPDGRIAEIVYNGEHNHPKP<br>GV   |
| >OsWRKY63-CTD                                                                 |
| VTSVPADDGYSWRKYGQKNVLFVSYLRYRCSYKCTHTPTCPVKKRKMVEMTPDGRIAEIVYNGEHNHPKP<br>GV  |

>OsWRKY64  
ETPVPHYDGHQWRKYGQKHINNSKHPRSYRCTYRQECKATKTVQQREDLHHANSYNGDHPVMYTVVYY  
GQHTCCKGP

>OsWRKY65  
VTVPDFDGYQWRKYGQKQIEGAMYPRSYRCTNSTNQGLAQKTVQRNGGGAAGYTVAYISEHTCKSI

>OsWRKY66  
SGEVVPSDLWAWRKYGQKPIKGSYPRGYRCSKSGCSARKQVERSRTDPNMLVITYTSEHNHPWP

>OsWRKY67  
SEVEILDDGFKWRKYGKAVKNSPNRNYRCSSTEGCNVKKRVERDREDHRYVITTYDGVHNHASP

>OsWRKY68  
KIADIPPDEYSWRKYGQKPIKGSYPRGYRCSSTVRCGCPARKHVERATDDPAMLVVTYEGEHRHTPG

>OsWRKY69  
GAEGPADDGHSWRKYGQKDILGAKHPRGYRCTRNTQGCATKQVQRTDDASLFDVVYHGEHTCRPG

>OsWRKY70-NTD  
QSRSSDDGYNWRKYGQKQMKGSENPRSYRCTFPGCPTKKKVEQSPDGQVTEIVYKGAHSHPKP

>OsWRKY70-CTD  
SDIDILDDGYRWRKYGQKVVKGPNRNYRCSSTAGCPVRKHVERASNDLRAVITYEGKHNHDVP

>OsWRKY71  
DLSLVVKDGYQWRKYGQKVTKDNPFRAYFRCSFAPACPVKKKQVQSAEDNTILVATYEGEHNHGQP

>OsWRKY72  
SQVDILDDGYRWRKYGQKAVKNNKFRSYRCTHQGCNVKKQVQLSRDETVVVVTTYEGTHTHPIE

>OsWRKY73  
CDAPTMDGCGWRKYGQKIAKGNPCPRAYRCTVAAGCPVRKQVQRCADDMSILITTYEGTHNHPL

>OsWRKY74  
VENPPVDDGHSWRKYGQKEILGAKHPRGYRCTRHSQGCMAKQVQRTDEDAMVFDVIYHGEHTCVHK

>OsWRKY75  
NTEQPDDGYTWRKYGQKDILGSRYPYRCSSTHKNYGCCEAKKQVQLDDDPFTYEVTYCGNHTCLTS

>OsWRKY76  
DTSLVVKDGQWRKYGQKVTRDNPSPRAYFRCAFAPSCPVKKKQVQSAEDSSLLVATYEGEHNHPHP

>OsWRKY77  
SEVDVLDDGYRWRKYGKMMVKNSPNRNYRCSSEGCVRKKRVERARDDARFVVVTTYDGVHNHPAP

>OsWRKY78-NTD  
VAEKSAEDGYNWRKYGQKHVKGSENPRSYRCTHPNCDVKKLLERSLDGQITEVVYKGRHNHPKP

>OsWRKY78-CTD  
SEVDILDDGYRWRKYGQKVVKGPNRNYRCSSTNTGCPVRKHVERASHDKSVITYEGKHNHEVP

>OsWRKY79  
SDVDVLDDGYKWRKYGQKVVKNQHPRSYRCTQDNCRVKKRVERLAEDPRMVIITYEGRHVHSPS

>OsWRKY80  
SEVDILDDGYRWRKYGQKVVKGPNRNYRCSSTHQGCSVRKHVERASHDLKSVITYEGKHNHEVP

>OsWRKY81-NTD  
RMSYTEDDGFVSWRKYGQKDVEGAMHPTTQSNYFRCAHKMTTGCKARKKQVQRTDGDPLMVDVVYKGVHSCAG  
V

>OsWRKY81-CTD  
KDVGPPDDGYSWKRYGQKNIFGANYPRCYRCHKTTTGCTATKNAQATDGDPLLFVYHGEHTCDLQ

>OsWRKY82-NTD  
VSVNMVGDGFNWRKYGQKQVKSSENSRSYRCTNSNCLAKKKVEHCPDGRVVEIIRGTHNHEPP

>OsWRKY82-CTD  
VQAGKTSYDGYRWRKYGQKIVKGNPNRNYRCSSTHDGCPVRKHVEKAPDDNNIVVYEGKHNHDQP

>AtWRKY1-NTD\_ZAP1\_At2g04880\_NTD  
IREKVMEDGYNWRKYGQKLVKGNFVRSYRCTHPNCKAKKQLERSAGQVVDTVYFGEHDHPKP

>AtWRKY1-CTD\_ZAP1\_At2g04880\_CTD  
TLFDIVNDGYRWRKYGQKSVKGSPPYPRSYRCSPPGCPVKKHVERS SHDTKLLITTYEGKHDHDM P

>AtWRKY2-NTD\_At5g56270\_NTD  
AGGAPAEDGYNWRKYGQKLVKGSEYPRSYKCTNPNCQVKKKVERSREGHITEI IYKGAHNHLKP

>AtWRKY2-CTD\_At5g56270\_CTD  
SDVDILDDGYRWRKYGQKVVKGNPNPRSYKCTAPGCTVRKHVERASHDLKSVITTYEGKHNHDVP

>AtWRKY3-NTD\_At2g03340\_NTD  
NADKPADDGYNWRKYGQKQVKGSDFPYPRSYKCTHPACPVKKKVERS LDGQVTEI IYKGQHNEHP

>AtWRKY3-CTD\_At2g03340\_CTD  
SEVDLLDDGYRWRKYGQKVVKGNPYPRSYKCTTPDCGVRKHVERAATDPKAVVTTYEGKHNHDVP

>AtWRKY4-NTD\_At1g13960\_NTD  
NVDKPADDGYNWRKYGQKQVKGSEFPYPRSYKCTNPVPCPVKKKVERS LDGQVTEI IYKGQHNEHP

>AtWRKY4-CTD\_At1g13960\_CTD  
SEVDLLDDGYRWRKYGQKVVKGNPYPRSYKCTTPGCGVRKHVERAATDPKAVVTTYEGKHNHDLP

>AtWRKY10\_At1g55600  
SDEDNPNDGYRWRKYGQKVVKGNPNPRSYFKCTNIECRVKKHVERGADNIKLVVTTYDGIHNHPSP

>AtWRKY19-NTD\_At4g12020\_NTD  
NVDKQVNDGYNWKYQKQVKGSKFPLSYKCTYLGCPSKRKVERS LDGQVAEIVYKDRHNHEPP

>AtWRKY19-CTD\_At4g12020\_CTD  
SEVDNLDDGYRWRKYGQKVVKGNPYPRFSSSKDYDVVIRYGRADISNEDFISHLRASLCRRGISVYEKFNE  
VDALPKCRVLIIVLTSTYVPSNLLNILEHQHTED

>AtWRKY20-NTD\_At4g26640\_NTD  
TPSILADDGYNWRKYGQKHVKGSEFPYPRSYKCTHPNCEVKKLFFERSHDGQITDI IYKGTHDHPKP

>AtWRKY20-CTD\_At4g26640\_CTD  
SEVDILDDGYRWRKYGQKVVRGNPNPRSYKCTAHGCPVRKHVERASHDPKAVITTYEGKHDHDP

>AtWRKY25-NTD\_At2g30250\_NTD  
MVSRSNDGYGWRKYGQKQVKKSENPRSYFKCTYPDCVSKKIVETASDGQITEI IYKGGHNHPKP

>AtWRKY25-CTD\_At2g30250\_CTD  
SDIDVLIDGFRWRKYGQKVVKGNTPNPRSYKCTFQCGVKKQVERSAADERAVLTTYEGRHNHDIP

>AtWRKY26-NTD\_At5g07100\_NTD  
SSNKTSDGYNWRKYGQKQVKGSENPRSYFKCTYPNCLTKKKVETSLVKGQMI EIVYKGSNHNHPKPQSTKR  
S

>AtWRKY26-CTD\_At5g07100\_CTD  
SDIDILDDGYRWRKYGQKVVKGNPNPRSYKCTFTGCFVRKHVERAFQDPKSVITTYEGKHKHQIP

>AtWRKY32-NTD\_At4g30930\_NTD  
VPRTPARDGYNWRKYGQKQVKS PKGSRSYRCTYTECCA KIECSNDSGNVVEIVNKG LHTHEPP

>AtWRKY32-CTD\_At4g30930\_CTD  
GDVGICGDGYRWRKYGQKQVKG NPNHPRNYRCTSAGCPVRKH IETAVENTKAVI IYKGVHNHDM P

>AtWRKY33-NTD\_At2g38470\_NTD  
REQRKGEDGYNWRKYGQKQVKGSENPRSYKCTFPNCP TKKKVERSLEGQITEIVYKGSNHNHPKP

>AtWRKY33-CTD\_At2g38470\_CTD  
SDIDILDDGYRWRKYGQKVVKGNPNPRSYKCTTIGCPVRKHVERASHDMRAVITTYEGKHNHDVP

>AtWRKY34-NTD\_At4g26440\_NTD  
ACCAPADDGYNWRKYGQKLVKGSEYPRSYKCTHPNCEAKKKVERSREGHIEI IYTGDIHHSKP

>AtWRKY34-CTD\_At4g26440\_CTD  
SDIDILDDGYRWRKYGQKVVKGNPNPRSYKCTANGCTVTKHVERASDDFKSVLTTYIGKHTHVVP

>AtWRKY44-NTD\_TTG2\_At2g37260\_NTD  
TGDRSSVDGYNWRKYGQKQVKGSECPYPRSYKCTHPKCPVKKKVERSVEGQVSEIVYQGEHNHNSKP

>AtWRKY44-CTD\_TTG2\_At2g37260\_CTD  
VESDSLEDGFRWRKYGQKVVGGNAYPRSYRCTSANCRAKHVERASDDPRAFI TTYEGKHNHHL L

>AtWRKY45\_At3g01970  
SQVDILDDGYRWRKYGQKAVKNNPFPRSYKCTEEGCRVKKQVQRQWGDEGVVVTYQGVHTHAVD

>AtWRKY58-NTD\_At3g01080\_NTD  
NVDKPADDGYNWRKYGQKPIKGCEYPRSYKCTHVNCPVKKKVERS SDGQITQI IYKGQHDHERP

>AtWRKY58-CTD\_At3g01080\_CTD  
SEVDLLDDGYRWRKYGQKVVKGNPHPRSYKCTTPNCTVRKHVERASTDAKAVITTYEGKHNHDVP

>AtWRKY18\_At4g31800  
VTLQTVKDGFWQRKYGQKVTRDNPSPRAYFRCSFAPSCPVKKKVQRSAEDPSLLVATYEGTHNHLGP

>AtWRKY40\_At1g80840  
DTLTVVKDGYQWRKYGQKVTRDNPSPRAYFKCACAPSCSVKKKQVRSVEDQSVLVATYEGEHNHPMP

>AtWRKY60\_At2g25000  
DTSLTVKDGQWRKYGQKITRDNPSPRAYFRCSFSPSCLVKKKQVRSVSAEDPSFLVATYEGTHNHTGP

>AtWRKY6\_At1g62300  
SEAPMISDGCQWRKYGQKMAKGNPCPRAYRCTMATGCPVRKQVQRCAEDRSILITTYEGNHNHPLP

>AtWRKY9\_At1g68150  
CETATMNDGCQWRKYGQKTAKGNPCPRAYRCTVAPGCPVRKQVQRCELDMSILITTYEGTHNHP

>AtWRKY31\_At4g22070  
SEAAMISDGCQWRKYGQKMAKGNPCPRAYRCTMAGGCPVRKQVQRCAEDRSILITTYEGNHNHPLP

>AtWRKY36\_At1g69810  
CEDPSINDGCQWRKYGQKTAKTNPLPRAYRCSMSSNCPVRKQVQRCEGEEETSAFMTTYEGNHDHPLP

>AtWRKY42\_At4g04450  
SEAPMLSDGCQWRKYGQKMAKGNPCPRAYRCTMAVGCPVRKQVQRCAEDRTILITTYEGNHNHPLP

>AtWRKY47\_At4g01720  
SDATTVNDGCQWRKYGQKMAKGNPCPRAYRCTMAVGCPVRKQVQRCAEDTILITTYEGNHNHPLP

>AtWRKY61\_At1g18860  
KTRVSMNDGCQWRKYGQKIAKGNPCPRAYRCTIAASCPVRKQVQRCESEDMSILISTYEGTHNHP

>AtWRKY72\_At5g15130  
CDTPTMNDGCQWRKYGQKIAKGNPCPRAYRCTVAPGCPVRKQVQRCAEDMSILITTYEGTHSHSLP

>AtWRKY8\_At5g46350  
TEVDHLEDGYRWRKYGQKAVKNSPYPRSYRCTTQKCNVKKRVERSYQDPTVVITTYESQHNHP

>AtWRKY13\_At4g39410  
SEVDVLDDGYRWRKYGQKVVKNTQHPRSYRCTQDKCRVKKRVERLADDPVMVITTYEGRHLHSPS

>AtWRKY23\_At2g47260  
SEVDHLEDGYRWRKYGQKAVKNSPFPRSYRCTTASCNVKKRVERFRDPSTVVTTYEGQHTHISP

>AtWRKY24\_At5g41570  
SDDDLDDGYRWRKYGQKSVKHNAHPRSYRCTYHTCNVKKQVQRLAKDPNVVVTTYEGVHNHPCE

>AtWRKY28\_At4g18170  
SEVDHLEDGYRWRKYGQKAVKNSPYPRI IANGNENRSYRCTTQKCNVKKRVERSFQDPTVVITTYEGQHNH

>AtWRKY43\_At2g46130  
SDADILDDGYRWRKYGQKSVKNSLYPRSYRCTQHMCNVKKQVQRLSKETSIVETTYEGIHHPCE

>AtWRKY48\_At5g49520  
SDIDNLDDGYRWRKYGQKAVKNSPYPRSYRCTTVGCGVKKRVERSSDDPSIVMTTYEGQHTHPFP

>AtWRKY49\_At5g43290  
NSNGMCDDGYKWRKYGQKSIKNSPNRPSYKCTNPICNAKKQVERS IDESNTYI IITYEGFHFHYTY

>AtWRKY50\_At5g26170  
SEVEVLDDGFKWRKYGKKMVKNSPHPRNYKCSVDGCPVKKRVERDRDDPSFVITTYEGSHNHSSM

>AtWRKY51\_At5g64810  
SKIDVMDDGFKWRKYGKKSVKNNINKRLRLYREGNVKATCKKSLCDSVTCRQRDLFEEDEPEY



Supplementary Table 1|

>AtWRKY56\_At1g64000  
SDDVLDGGRWRKYGQKSVKNNNAHPRSYRCTYHTCNVKKQVQRLAKDPNVVVTTYEGVHNHPCE

>AtWRKY57\_At1g69310  
SDVDNLEDGYRWRKYGQKAVKNSPFPRSYRCTNSRCTVKKRVERSDDPSIVITTYEGQHCHQTI

>AtWRKY59\_At2g21900  
DEKVALDDGYKWRKYGKKPITGSPFPRHYHKSSPDCNVKKIERDTNNDYILTTYEGRHNHPSP

>AtWRKY68\_At3g62340  
SEVLHLDDGYKWRKYGQKPKVSDPFPRNYRCTTTWCDEVKKRVERSFSDDPSIVITTYEGQHTHPRP

>AtWRKY71\_At1g29860  
SEIDHLEDGYRWRKYGQKAVKNSPYPRSYRCTTQKCNVKKRVERSFDPSIVITTYEGKHNPPIP

>AtWRKY75\_At5g13080  
SQVDILDDGYRWRKYGQKAVKNNKFPRSYRCTYGGCNVKKQVQRLTVDQEVVVTTYEGVHSHPIE

>AtWRKY7\_At4g24240  
KMADIPSDEFSWRKYGQKPIKGSPPRGYKCSSVRGCPARKHVERALDDAMMLIVTYEGDHNHALV

>AtWRKY11\_At4g31550  
KIADIPPDEYSWRKYGQKPIKGSPPRGYKCSSTFRGCPARKHVERALDDPAMLIVTYEGEHRHNQS

>AtWRKY15\_At2g23320  
KMSDVPPDDYSWRKYGQKPIKGSPPRGYKCSSVRGCPARKHVERAADDSSMLIVTYEGDHNHSLV

>AtWRKY17\_At2g24570  
KIADIPPDEYSWRKYGQKPIKGSPPRGYKCSSTFRGCPARKHVERALDDSTMLIVTYEGEHRHHQS

>AtWRKY21\_At2g30590  
KVADIPPDDYSWRKYGQKPIKGSPPRGYKCSSMRGCPARKHVERCLEDPAMLIVTYEAEHNHPKL

>AtWRKY39\_At3g04670  
KIADIPPDEYSWRKYGQKPIKGSPPRGYKCSSVRGCPARKHVERCIDETSMLIVTYEGEHNHSRI

>AtWRKY74\_At5g28650  
KIADIPPDEYSWRKYGQKPIKGSPPRGYKCSSVRGCPARKHVERCVEETSMLIVTYEGEHNHSRI

>AtWRKY14\_At1g30650  
SGEVVPSDLWAWRKYGQKPIKGSPPRGYRCSSSKGCSARKQVERSRTPNMLVITYTSEHNHPWP

>AtWRKY16\_At5g45050  
DRGSRSSDLWVWRKYGQKPIKSSPYPRSYRCASSKGCFAKQVERSRTPNVSVITYISEHNHPFP

>AtWRKY22\_At4g01250  
AAEALNSDVWAWRKYGQKPIKGSPPRGYRCSSTKGCCLARKQVERNRSDPKMFIVTYTAENHPAP

>AtWRKY27\_At5g52830  
TQENLSSDLWAWRKYGQKPIKGSPPRYRCSSSKGCLARKQVERSNLDPNIFIVTYTGEHTHPRP

>AtWRKY29\_At4g23550  
KEENLLSDAWAWRKYGQKPIKGSPPRYRCSSSKGCLARKQVERNPNQPEKFTITYTNEHNHELP

>AtWRKY35\_At2g34830  
SGEVVPSDLWAWRKYGQKPIKGSPPRGYRCSSSKGCSARKQVERSRTPNMLVITYTSEHNHPWP

>AtWRKY65\_At1g29280  
GDTTPPSDSWAWRKYGQKPIKGSPPRGYRCSSTKGCPCARKQVERSRDDPTMLIVTYTSEHNHPWP

>AtWRKY69\_At3g58710  
GEVYPPSDSWAWRKYGQKPIKGSPPSGGLEMRKRRVALTVVGLTGYRCSSSKGCPCARKQVERSRVDPKSLMITYACDHNHPFP

>AtWRKY30\_At5g24110  
GVDRTLDDGFSWRKYGQKDILGAKFPRGYRCTYRKSQCEATKQVQRSDENQMLLEISYRGIHSCSQA

>AtWRKY38\_At5g22570  
SPDPIYDGYLWRKYGQKSIKSNHQRSYRCSYNKDHNCCEARKHEQKIKDNPPVYRTTYFGHHTCKTE

>AtWRKY41\_At4g11070  
GLEGPHDDIFSWRKYGQKDILGAKFPRSYRCTFRNTQYCWATKQVQRSDGDPTIFEVYRGTHTCSQG

>AtWRKY46\_At2g46400  
QENGSIDDGHCWRKYGQKEIHGSKNPRAYRCTHRFTQDCLAVKQVQKSDTDP SLFEVKYLGHNHTCNNI

>AtWRKY52\_RRS1\_At5g45270  
IPAIDEGDLWTRKYGQKDILGSRFPRGYRCAKFTHGCKATKQVQRSETSDNMLAITYLSEHNHPRP

>AtWRKY53\_At4g23810  
GLEGPQDDVFSWRKYGQKDILGAKFPRSYYRCTHRSTQNCWATKQVQRSDGDATVFEVYRGTHTCSQA

>AtWRKY54\_At2g40750  
VEAKSSEDRYAWRKYGQKEILNTTFPRSYYRCTHKPTQGCKATKQVQKQDQDSEMFQITYIGYHTCTAN

>AtWRKY55\_At2g40740  
NTDLPDDNHTWRKYGQKEILGSRFPRAYRCTHQKLYNCPAKKQVQRLNDDPFTFRVYRGSHTCYNS

>AtWRKY62\_At5g01900  
SSTPIYHDGFLWRKYGQKQIKESYQRSYYKCAKTKDQNCQAKKQVQKIQHNPPLYSTTYFGQHIQQLH

>AtWRKY63\_At1g66600  
SPNRLDDGFTWRKYGQKTIKTSLYQRCYYRCAKDKQNCYATKRVQMIQDSDPPVYRRTTYLGQHTCKAF

>AtWRKY64\_At1g66560  
SPTPRDDGFTWRKYGQKTIKTSPLYQRCYYRCTYAKDQNCNARKRVQMIQDNPPVYRRTTYLGKHVCKAV

>AtWRKY66\_At1g80590  
SPTPAHIDGFIWRKYGQKTIKTSPHQRWYYRCAKDKQNCDATKRVQKIQDNPPVYRNTYVYGQHACEAP

>AtWRKY67\_At1g66550  
SRTMCPNDGFTWRKYGQKTIKASAHKRCYYRCTYAKDQNCNATKRVQKIKDNPPVYRRTTYLGKHVCKAF

>AtWRKY70\_At3g56400  
IESTILEDAFSWRKYGQKEILNAKFPRSYYRCTHKYTGCKATKQVQKVELEPKMFSITYIGNHTCNTN

>AtWRKY12  
SDVDVLDDGYKWRKYGQKVVKNSLHPRSYYRCTHNNCRVKKRVERLSEDCRMVITTYEGRHNHIPS

>CrWRKY10\_homolog  
SDEDNPEDEGFRWRKYGQKVVKGNPNPRSYYFKCTNNDNCNVKHHVERGADNFKILVTSYDGIHNHPPP

>NtWRKY11  
SQIEILDDGYKWRKYGKKMKVSDPNPRNYYRCSI ESCPVKKRVERDKEDCRYVITTYEGVHNHQGP

>NtWRKY10  
SQIEILDDGYKWRKYGKKMKVSDPNPRNYYRCSVEGCPVKRVERDKEDCRYVITTYEGVHNHQGP

>PheWRKY10\_Phyllostachys\_edulis  
SEVEILDDGFKWRKYGKKAVKNSPNPRNYYRCSVEGCGVKRVERDGDPCYVITTYDGVHNHATP

>IbsPF1\_NTD  
REQRRSDDGYNWRKYGQKQVKGSENPRSYYKCTHPNCPTKKKVERALDQITEIVYKGAHNHPKP

>IbsPF1\_CTD  
SDIDILDDGYRWRKYGQKVVKGNPNPRSYYKCTSQGCPVRKHVERASHDIRSVITTYEGKHNHDVP

>AfABF1\_NTD  
SQRRSSDDGYNWRKYGQKQVKGSENPRSYYKCTFPNCPTKKKVEITSIEGQITEIVYKGTNHAKP

>AfABF1\_CTD  
SDIDILDDGYRWRKYGQKVVKGNPNPRSYYKCTTVGCPVRKHVERASHDLRAVITTYEGKHNHDVP

>CsSPF1\_NTD  
GSDKPADDGYNWRKYGQKLVKGSEFPRSYYKCTHLNCPKRRKIEGLPDGEITEIIVYKQHNHEPP

>CsSPF1\_CTD  
SEVDLLDDGYRWRKYGQKVVKGNPNPRSYYKCTSAGCNVRKHVERSSDTSKAVVITTYEGKHNHDVP

>PcWRKY1\_NTD  
RDQSKLDDGYNWRKYGQKQVKGSENPRSYYKCTYLNCPTKKKVEITFDGHITEIVYKGNHNHPKP

>PcWRKY1\_CTD  
SDIDILDDGYRWRKYGQKVVKGNPNPRSYYKCTQVGC PVRKHVERASHDLRAVITTYEGKHNHDVP

>PbZFP1\_NTD  
RDQSKLDDGYNRWKYGQKQVKGSENPRSYKCTYLNCPTKKKVVETTFDGHITEIVYKGNHNHPKP

>PbZFP1\_CTD  
SDIDILDDGYRWRWKYGQKVVGKGNPNPRSYKCTQVGCPCVRKHVERASHDLRAVITTYEGKHNHDVP

>Glamblia\_WRKY-NTD\_XM\_765980  
TIRELPADGYCWRKYGSKRLPNNSHPKSYFRCSVPGCQAKRYVTETDNRVLKTEYIGEHNHGKS

>Glamblia\_WRKY-CTD\_XM\_765980  
DQIESSIDFFRWKYGHKPQTDTRLDSKSYRCAFFNCPARRTITFFYSLSSDGTETVESVIVQYENQHT  
HPPD

>Ddiscoideum\_WRKY-NTD\_XM\_638694  
NISNIIVSDGYQWRWKYGQKNVKGSLHPRHYKCTFQGCNVRKQVERIGDTNQNSTVYKGEHCHGFP

>Ddiscoideum\_WRKY-CTD\_XM\_638694  
SSIDHLDDGFFWRWKYGQKSVKGSFPKSYFKCAELTCPVKKQVIQQDSKYINTYRKGHNHDPP

>CuWRKY50-Citrus\_unshiu  
SDVEILDDGFKWRWKYGKMKVKNPNPRNYKCSVDGCPVKKRVERDRDDPSYVITTYEGFHTHQS

>VvWRKY50-Vitis\_vinifera  
SEIEILDDGFKWRWKYGKMKVKNPNPRNYRCSVDGCNVKKRVERDREDPKYVITTYEGIHNHESP

>PtWRKY50-like-Populus-trichocarpa  
SEIEILDDGFKWRWKYGKMKVKNPNPRNYRCSVDGCNVKKRVERDREDPKYVITTYEGIHNHESP

>GmWRKY50-like\_Glycine\_max  
SEVEILDDGFKWRWKYGKMKVKNPNPRNYRCSVDGCVKKRVERDKDDPRYVITTYEGIHNHQSYI

>RcWRKY50-like Ricinus communis  
SEIEILDDGFKWRWKYGKMKVKNPNPRNYRCSVEGCPVKKRVERDKDDLRFVITTYEGIHNHPS

>MtWRKY50-like\_Medicago\_truncatula  
SEIEILDDGFKWRWKYGKMKVKNPNPRNYRCSVEGCPVKKRVERDKDDLRFVITTYEGIHNHPS

>ZmWRKY67\_Zea\_mays  
SEVEILDDGFKWRWKYGKMAVKNPNPRNYRCSSEGGCVKKRVERDRDDPRYVITTYDGVHNHASP

>VvWRKY51\_Vitis\_vinifera  
SDLEIMDDGFKWRWKYGKMSVKNPNPRNYKCSAGGCNVKKRVERDREDSSYVITTYEGVHNHESP

>PpWRKY1  
KLADIPSDEYSWRWKYGQKPIKGSPPHPRGYKCSSIRGCPARKHVERSMEDSSMLIVTYEGDHNHPQS

>PpWRKY2  
KLADIPDDYSWRWKYGQKPIKGSPPHPRGYKCSSIRGCPARKHVERSMEDPTMLIVTYEGNHLHRTQ

>PpWRKY3  
SEIDVMEDGYKWRWKYGQKAVKDSPPFRSYRCTNQTCPVRKRVERKAGDAGLVVTTYEGTHSHLSP

>PpWRKY4  
SDVDILDDGYRWRWKYGQKVVGKGNPHPRSYKCTNVGCPVRKHVERASNDPKAVITTYEGKHNHDVP

>PpWRKY5  
DGCQWRWKYGQKMAKGNPWPFRAYFRCTVSPGCPVRKQVQRCEEDTSLVTTYEGTHNHALS

>PpWRKY6  
SEVDVIDDGYKWRWKYGQKPVKSSPHPRNYRCTTANCPVRKRVERSIEDPGLIVTSYEGTHHPKI

>PpWRKY7  
KLADIPPEYSWRWKYGQKPIKGSPPHPRGYKCSSIRGCPARKHVERSMEDSTMLIVTYEGEHNHL

>PpWRKY8  
KLADIPDDYSWRWKYGQKPIKGSPPHPRGYKCSSIRGCPARKHVERSMEDPTMLIVTYEGEHNHPQS

>PpWRKY9  
KLADIPDDYSWRWKYGQKPIKGSPPHPRGYKCSSIRGCPARKHVERSMEDPTMLIVTYEGEHNHPQL

>PpWRKY10  
INDGQWRWKYGQKMAKGNPCPRAYRCTVMGCPVRKQVQRCAKDTSLVSTYEGTHNHPL

>PpWRKY11  
KTTDVMDDGYKWRKYGQKPVKSSPHPRNYYRCTTPNCPVRKRVERSTEDPDQVITTYEGRHTHQSP

>PpWRKY12  
TEVDVMEDGYKWRKYGQKPVKNSPHPRNYYRCTTAHCPVRKRVERSTEDPGLVITSYEGTHSH

>PpWRKY13  
QWRKYGQKMAKGNPCPRAYRCTVAPGCPVRKQVQRCADDISILVTTYEGTHNH

>PpWRKY14M  
SDVEIMEDGYKWRKYGQKAVKNSPHPRYRCTNPKCPVRKKVERSADDSSESVITTYEGTHTH

>PpWRKY15  
TEVDVIDDGYKWRKYGQKPVKNSVHPRNYYKCTTANCPVRKRVERCTDDPSHVLTTYDGTHTH

>PpWRKY16-NTD  
DRPSEDGYNWRKYGQKQVKGSEYPRSYKCTQANCPMKKKVERSHDGQVTEIVYKGDHNHPKP

>PpWRKY16-CTD  
SDVDILDDGYRWRKYGQKVVKGNPHPRSYKCTNVGCPVRKHVERASTDIKAVITTYEGKHNHDVP

>PpWRKY17  
SDVDIMEDGYKWRKYGQKAVKNSPYPRSYRCTNPDCPVRKRVERKADDHGLVTTYEGTHNH

>PpWRKY18  
TDVDIMDDGFKWRKYGQKAVKNSPHPRNYYRCTTPQCPVRKRVERSSEDAGLVITTYEGTHTH

>PpWRKY19  
MNDGCQWRKYGQKMAKGNPCPRAYRCTVAPGCPVRKQVQRCADDVSLITTYEGTHNHPL

>PpWRKY20  
SEVDVLEDGYKWRKYGQKAVKNSHPRSYRCTSHTCPVRKRIERKADDPGLVITTYEGTHNH

>PpWRKY21  
ADTDVLDDGYKWRKYGQKAVKNSPHPRNYYRCATPNCPVRKRVERCIEDPGLVATAYEGTHSHQFP

>PpWRKY22  
SDVEIMEDGYKWRKYGQKAVKNSPHPRSYRCTHMMCPVRKRVERSAEDTGLVITTYEGTHTH

>PpWRKY23-NTD  
DRPSEDGYNWRKYGQKQVKGSEYPRSYKCTQTNCPMKKKVERSHDGQVTEIVYKGDHNHPKP

>PpWRKY23-CTD  
SDVDILDDGYRWRKYGQKVVKGNPHPRSYKCTNVGCPVRKHVERASTDIKAVITTYEGKHNHDVP

>PpWRKY24  
TDVDIMDDGFKWRKYGQKAVKNSPYPRNYYRCTTPQCPVRKRVERSCEDSGLVITTYEGTHTH

>PpWRKY25  
IKGSPHPRGYKCSSMRGCLARKHVERSLEDSSMLIITYEGEHNHSRSTSVSAALLCT

>PpWRKY26  
SDVDIIDDGYRWRKYGQKPVKNSHPRNYYKCTTPNCLVKKQVERCTENPSNVMTTYGTHNH

>PpWRKY27  
TDTDVMDDGYKWRKYGQKAVKNSPHPRNYYRCTTLNCPVRKRVERCFDDPGVMVTTYEGTHTH

>PpWRKY28  
SILDIMEDGYKWRKYGQKAVKNSPHPRSYRCTNPKCPVRKKVERSADDSSELVITSYEGTHTH

>PpWRKY29  
TDVDVLDDGFKWRKYGQKAVKNSPHPRNYYRCTTPLCPVRKRVERSNEDAGLVITTYEGTHSH

>PpWRKY30  
TDLDMVEDGYKWRKYGQKTVLSSPYPRSYKCTTAGCRVRKQVSRVCDRGLVIASYEGEHHH

>PpWRKY31  
TDMVDLDDGFKWRKYGQKAVKNSPHPRNYYRCTTPLCPVRKRVERSKEDAGLVITTYEGTHSH

>PpWRKY32  
SDSTTMNDGCQWRKYGQNTAKGNLCPRGLLPLYCGALLSRPQAGFCDNVQRCVCAHDKSVLITTYEGTHNH  
IP

>PpWRKY33  
DGCHWRKYGQKMAKGNPCPRAYRCTLRLGCPVRKQVQRCADDLSILITTYEGTHNHP IPA

>PpWRKY34  
KRGIPDDGHRGWKKYGNKAIQNSNHCRGYYKCSLKECRAKCMVQLTDRDPTLFEVTVGKHSCSSS

>PpWRKY35  
KKGIPDDGHRGWKKYGNKSIQNSNHCRGYYKCSVKECRAKCMVQPTDKDPMVFEITYVGKHTCSST

>PpWRKY36  
KKGIPDDGHRGWKKYGNKSIQNSNHCRGYYKCSVKECRAKCMVQPTDTPVFEVTVGKHTCSST

>PpWRKY37  
KKGIPDDGHRGWKKYGNKAIQNSTFCRGYYKCSMKECRAKCMVQPTDTPNPSIFEVTVGKHTCSST

>PpWRKY38  
KKAIPDDDHRRGWKKYGNKTIQNSNFCRNLWEEETRTRTFVVAISGPTSECSDHVDMLDIRGYKCGMVDCRA  
KCMVQPTVQDPSIFEVTVGKHTCSGS

>SemWRKY1  
SDVDIMDDGFRWRKYGQKAVKNSPHRSYYRCTNSKCPVKKRVERSCEDPGIVITTYEGTHTH

>SemWRKY2  
APADDGFTWRKYGQKDILNSKFPRSYYRCTHQKELGCQATKYVQKCEDEPSMYQVTVYIGEHSQNA

>SemWRKY3  
WRKYGQKMAKGNPCPRAYRCTMASGCPVRKQVQRCADDTSVLVTTTYEGSHNHQLP

>SemWRKY4-NTD  
DGYNWRKYGQKQVKGCDNPRSYYRCTHPDCSAKLVERSVSGETTQIVYKGDHSHSKP

>SemWRKY4-CTD  
SEVDVLDDGYRWRKYGQKVVKGNPNPRSYYRCTNPGCPVRKHVERAADDPKAVITSYEGKHDHDP

>SemWRKY5-NTD  
FVERPSEDGFNWRKYGQKQVKGSEFPRSYYKCTSSGCPVKKKVERSQDQVTEIVYKGEHNHPRP

>SemWRKY5-CTD  
SEIDILDDGYRWRKYGQKIVKGNPYPRSYYKCTNVGCPVRKHVERASNDPKSVITTYEGKHNDVP

>SemWRKY6-NTD  
PAERSSDDGYNWRKYGQKLVKGSNPNPRSYYKCTYVNCMPKKKVERSPPDQVTEIVYEGEHNHPKP

>SemWRKY6-CTD  
SEVDILDDGYRWRKYGQKVVKGNPNPRSYYKCTNLGCPVRKHVERACDDPRAVITTYEGKHNDVP

>SemWRKY7  
MNDGCQWRKYGQKMAKGNPCPRAYRCTVAPGCPVRKQVQRCADDMSILITTYEGSHNHPLP

>SemWRKY8  
KIADIPQDEYSWRKYGQKPIKGSPPHPRGYYKCSLRGCPARKHVERCLDDPTMLRVTYEGEHSQVQ

>SemWRKY9  
KMAEIPDDYSWRKYGQKPIKGSPPHPRGYYKCSMRGCPARK

>SemWRKY10  
VSNKIADIPQDERKYGQKPIKGSPPHPRGYYKCSLRGCPARK

>SemWRKY11  
KKGQKRIREPRYAIQTRSEVDIMDDGYRWRKYGQKAVKNSPHRSYYRCTNTKCPVKKRVERSSDQGLV  
ITTYEGIHNH

>SemWRKY12  
MQQKRIVCVPVAGGGKPTGEVLPSPDMAWRKYGQKPIKGSPPHPRGYYRCSSSKGCARKQVERSRNDPTM  
LITTYTSEHNHPWPAHRNSLAGTTR

>SemWRKY13-NTD  
RPSEDGFNWRKYGQKQVKGSEFPRSYYKCTSSGCPVKKKVERSQDQVTEIVYKGEHNHPRP

>SemWRKY13-CTD  
SEIDILDDGYRWRKYGQKIVKGNPYPRSYYKCTNVGCPVRKHVERASNDPKSVITTYEGKHNDVP



>SemWRKY14  
SDVDIMDDGFRWRKYGQKAVKNSPHPRSYRCTNSKCPVKKRVERSCEDPGIVITTYEGTHTH

>SemWRKY15  
SEIDILDDGYRWRKYGQKVVGKGNPHPRYYYYKSSSGCAVRKHVERASNDPKSVITTYEGKHNDVP

>SemWRKY16  
DDGYTWRKYGQKDILGSRHPKSYRCTHKRESGCPAICYVQRSDSNPSSFQITRGEHTCNML

>SemWRKY17  
KIADIPQDEYSWRKYGQKPIKGSPPHPRGYYKCSSLRGCPARKHVERCLDDPTMLRVTYEGEHSBGVQ

>Sem\_WRKY18  
KMAEIPDDYSWRKYGQKPIKGSPPHPRGYYKCSSMRGCPARK

>Sem\_WRKY19  
MFLDGGTHQKASQAGIKGSPPHPRGYYKCSSLRGCPARKHVERCLDDPTTDAGERSHGVQPQ

>SemWRKY20-NTD  
PAERSSDDGYNWRKYGQKLVKGSNENPRSYRCTYVNCMPKKKVERSPPDGQVTEIVYEGEHNHPK

>SemWRKY20-CTD  
SEVDILDDGYRWRKYGQKVVGKGNPHPRSYRCTNLGCPVRKHVERACDDPRAVITTYEGKHNDVP

>SemWRKY21  
KLADIPDDYSWRKYGQKPIKGSPPHPRGYYKCSSMRGCPARK

>SemWRKY22-NTD  
ERPSEDGFNWRKYGQKQVKGSEFPRSYRCTHPSCPVKKKVERSYPDGQVTEIVYKGEHCHAKP

>SemWRKY22-CTD  
SEIDILDDGYRWRKYGQKVVGKGNPHPRYYYYKSSSGCAVRKHVERASNDPKSVITTYEGKHNDVP

>SemWRKY23  
MNDGCQWRKYGQKMAKGNPCPRAYRCTMSPGCPVRKQVQRCAEDTSLVITTYEGTHNHPLP

>SemWRKY24  
SDKEIMDDGYRWRKYGQKAVKNSPYPRSYRCTYTKCHVKKRVERSCKDSSLVITTYEGVHTH

>SemWRKY25  
APADDGFTWRKYGQKDILNSKFPRSYRCTHQKELGCQATKYVQKCEDEPSMYQVTYIGEHSQNA

>SemWRKY26  
MNDGCQWRKYGQKMAKGNPCPRAYRCTVAPGCPVRKQVQRCAEDMSILITTYEGSHNHPLP

>SemWRKY27  
DDGYTWRKYGQKDILGSRHPKSYRCTHKRESGCPAICYVQRSDSNPSSFQITRGEHTCNML

>SemWRKY28  
WRKYGQKMAKGNPCPRAYRCTMASGCPVRKQVQRCAEDTSLVITTYEGSHNHQLP

>SemWRKY29  
SEVDIMDDGYRWRKYGQKAVKNSPHPRSYRCTNTKCPVKKRVERSSEDQGLVITTYEGIHNH

>SemWRKY30  
SDVDIMDDGFRWRKYGQKAVKNSPHPRSYRCTNSKCPVKKRVERSCEDPGIVITTYEGTHTH

>SemWRKY31  
KLADIPDDYSWRKYGQKPIKGSPPHPRGYYKCSSMRGCPARK

>SemWRKY32  
SDKEIMDDGYRWRKYGQKAVKNSPYPRSYRCTYTKCHVKKRVERSCKDSSLVITTYEGVHTH

>SemWRKY33  
MNDGCQWRKYGQKMAKGNPCPRAYRCTMSPGCPVRKQVQRCAEDTSLVITTYEGTHNHPLP

>SemWRKY34  
TGEVLPSPDMAWRKYGQKPIKGSPPHPRGYYRCSKSSKGSARKQVERSRNDPTMLIITYTSEHNHPWP

>CocSub\_NTD  
NDDGYHWRKYGEKQVKGSPYPRSYRCSQNCQVKKIVERNPENGEVSKSASKGVHNHAKP

>CocSub\_CTD  
TDQDSMDDGYRWRKYGQKIVKGNPHPRSYKCTVAGCTVRKHVGRSATEAGVLVTSYEGQHNHPQP

>Tetrapisispora blattae CBS 6284  
SQSKLLDVEIEWEKYGVNLAEYILEDEELLALYHSGLL

>Cyanidioschyzon merolae  
RCILLEAFDCSWRKYEHSVGCLTAENLLPRVCQHVNFVPWNGHCENSRGCITNGETSTLVRYPVSIGDCD  
TGSSSIPGENDVVFSSIHSTEVW

>Chr\_h\_WRKY\_EST\_BQ821537  
VDITNMDDGYRWRKYGQKQVKGSPFPRAYYKCTHMGCSVRKHVERSAEDETFRFVVTYEGTHSHRLP

>XP\_003061495\_MiPu  
MPGVDDGYRWRKYGQKIIKGAFFPRSYRCTSANCPARKHVEGDPSSLSSLYEGEHNHEKP

>XP\_003054981\_MiPu  
TSDIRIDDGYRWRKYGQKLIKGSPPFRSYKCTSENSMQKHVEQSADNPPLYVVVYHSDRSQANVVYAK  
LKESAPTLKITMHGLDE

>XP\_002509266\_MiPu  
PAMPPESEDGYRWRKYGQKIIKGAFFPRSYRCTAPNCPARKHVEGDPKDPGSIAYEGTHNHEPP

>MICPUN\_61119  
RRSDIEEDGYVWHKYGAKNVRGRKVGYFKCAHRGCEARKKVWRQANGDEAVEREGTHTHAAG

>ChvWRKY1-NTD\_Chlorella\_variabilis\_WRKY  
MANDDGYNWRKYGEKQVKGSPFPRSYKCSHPGCPAKKMIEREPKTGRISQAEKNEHNHAKP

>ChvWRKY1-CTD\_Chlorella\_variabilis\_WRKY  
TDADGMDDGYRWRKYGQKIVKGNPHPRSYKCTHPGCNVRKQVERSGRNARMLVTTYEGTHTHDPP

>OstISS1\_Ostreococcus\_tauri\_WRKY  
HNAHAHEDGYRWRKYGQKNIKGSRHPRSYRCTERGCPARKKTELASDDESEDEGEDRMRVTYEGVHTHP  
KP

>OstWRKY1\_Ostreococcus\_tauri\_WRKY  
TSEEKLLDDGFRWRKYGNKMLSGQPHPRAYYKCTSGCGKGFLLQKHVERIASKGREKHLFLVTTYGRSPGCE  
QTEELLEELYENFRARARSGGENLVDSVQMTRKRC

>OstWRKY33\_Ostreococcus\_tauri\_WRKY  
DEGVDENDGFRWRKYGCKLIAGNMVPHPTERSYYRCKHFGCPARKRVEVEKVTGATRTVYEFEHTRDGR

>OstWRKYputative\_Ostreococcus\_tauri\_WRKY  
APSSAHADGYRWRKYGQKNIKGSSFPFRSYRCTERGCPARKKTELRRASEDGEMETVVCYEGEHTHAKP

>Aspergillus flavus  
DDDEVSTDGLKWRKKGKCRSDLDLGLYLCGSGRCILGCLADKDCRRGQTCLGGQCRTAGGANPPSCKPY  
KQLCGANECCSGVCRLGWRLTRECKHSHK

>FLYWCH\_1\_human  
WDSPDPLRPLEFLRTSLGGRFLVHESFLYRKEKAAGEKVYWMCRDQARLGCERSRAITQGHRIMVMRSHCH  
QPD

>GCMA\_human  
KTDWFQEWPDYAKHIYSSDKNAQRHLSSWAMRNTNNHNSRILKKSCLGVVVCGRDCLAEGRKIYLRP  
AICDKARQKQQRKRCPCNDGPLKLIPCRGHGGFPVTNFWRHDFRIFQSKGEHDHPKPKETKLEAEARRA  
M

**Supplementary Table 2|** *At*WRKY protein sequences used for homology modeling.

>AtWRKY1 cDBD  
SRIVVHTQTLFDIVNDGYRWRKYGQKSVKGSPPYRCSYRCSSPGCPVKKHVERSSHDTKLLITTYEGKHDHD  
MPPG

>AtWRKY11 DBD  
VRVPAISAKIADI PPDEYSWRKYGQKPIKGSPPRGYYKCSTFRGCPARKHVERALDDPAMLIVTYEGEHRH  
NQSA

>AtWRKY33 cDBD  
PRIVVQTSDIDILDDGYRWRKYGQKVVKGNPNRSYKCTTIGCPVRKHVERASHDMRAVITTYEGKHNHD  
VPAA

>AtWRKY33 nDBD  
NQAVSYNGREQRKGEDGYNWRKYGQKQVKGSNPNRSYKCTFPNCPTKKKVERSLEGQITEIVYKGSNHHPK  
PQS

>AtWRKY50 DBD  
GRVAFKTRSEVEVLDDGFKWRKYGKKMVKNSPHPRNYYKCSVDGCPVKKRVERDRDDPSFVITTYEGSHNHS  
SMN

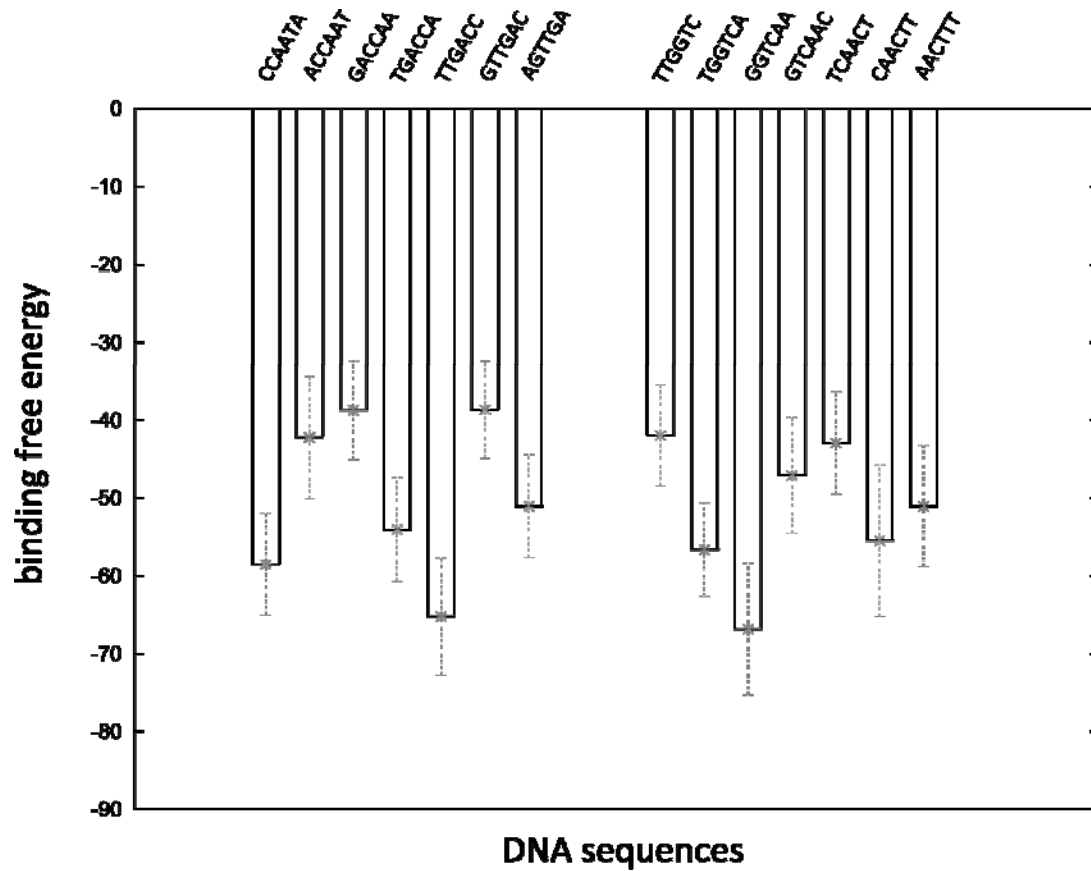

**Supplementary Figure 2|** *At*WRKY1 cDBD - DNA binding interface. Binding free energies (in kcal/mol) are estimated between *At*WRKY1 cDBD and 14 different DNA sequences originating from the parsley PR1-1 Box W2 promoter sequence using MM-PBSA. The 12 base pair long DNA sequence containing the TTGACC motif at the position of the WRKY1 cDBD site has the second highest binding free energy, whereas only its reverse complement strand containing the GTTCAA sequence at the position of the WRKY1 cDBD site has a higher binding free energy.

**Supplementary Table 3|** Listed are the sites of close proximity (1-4 Å) during molecular dynamics simulation of *Arabidopsis thaliana* DNA binding domain WRKY1, WRKY11, WRKY11\_Q29K, WRKY33 c, WRKY33n, WRKY50 and WRKY50\_K26Q with DNA. Given is the occupancy in percent during 5 ns of simulation. Highlighted in red, blue and green are the proximity sites that exhibit more than 50 % occupancy and are present in seven, six or five simulations, respectively (n.s. – not shown in Figure 7). Highlighted in black are other proximity sites that exhibit > 50 % occupancy and presence in one to four of the MD simulations. The DNA sequence is as follows: 2-aagTTGACCaa-12; 23-ttCAACTGGtt-13. The amino acids of the respective proteins are numbered according to Supplementary Table 2.

| DNA of consensus | W1 cDBD [%] |      | W11 DBD [%] |      | W11 DBD_Q29K [%] |      | W33 cDBD [%] |      | W33 nDBD [%] |      | W50 DBD [%] |      | W50 DBD_K26Q [%] |      | Fig. 7 |
|------------------|-------------|------|-------------|------|------------------|------|--------------|------|--------------|------|-------------|------|------------------|------|--------|
| Backbone T5      | I37         | 71,2 | I37         | 97,1 | I37              | 95,8 | I37          | 51,0 | K37          | 99,8 | V37         | 97,7 | V37              | 96,8 | n. s.  |
|                  | K46         | 99,9 | K46         | 99,9 | K46              | 99,9 | K46          | 99,9 | K46          | 99,9 | K46         | 99,9 | K46              | 99,9 | K 3    |
|                  | Y62         | 99,9 | Y62         | 99,9 | Y62              | 99,9 | Y62          | 99,9 | Y62          | 99,9 | Y62         | 99,9 | Y62              | 99,9 | Y 7    |
|                  |             |      | Q49         | 52,7 | K49              | 87,8 | Q49          | 99,8 | Q49          | 79,2 | K49         | 95,2 | Q49              | 99,6 | Q/K 6  |
|                  | D36         | 28,8 | D36         | 59,1 | D36              | 80,7 | D36          | 42,9 | R36          | 38,1 | E36         | 58,5 | E36              | 65,0 |        |
|                  |             |      |             |      |                  |      | S60          | 67,1 |              |      |             |      | N60              | 74,8 |        |
| Base T5          | K46         | 99,6 | K46         | 99,9 | K46              | 99,8 | K46          | 99,9 | K46          | 99,9 | K46         | 99,9 | K46              | 99,9 | K 3    |
|                  | Y62         | 96,7 | Y62         | 99,7 | Y62              | 98,9 | Y62          | 99,7 | Y62          | 99,9 | Y62         | 99,9 | Y62              | 99,9 | Y 7    |
|                  |             |      | R45         | 95,0 | R45              | 99,7 | R45          | 60,4 | R45          | 99,9 | R45         | 59,9 | R45              | 74,3 | R 2    |
|                  | I37         | 30,9 | I37         | 94,4 | I37              | 90,0 | I37          | 20,8 | K37          | 99,6 | V37         | 89,0 | V37              | 82,0 | n. s.  |
|                  |             |      |             |      |                  |      |              |      | Y47          | 81,7 |             |      |                  |      |        |
|                  |             |      |             | D36  | 20,9             |      |              |      |              | E36  | 22,4        |      |                  |      |        |
|                  |             |      |             |      |                  |      |              | W44  | 23,0         |      |             |      |                  |      |        |
| Backbone T6      | Q49         | 99,3 | Q49         | 99,4 | K49              | 99,9 | Q49          | 99,9 | Q49          | 99,9 | K49         | 99,8 | Q49              | 99,9 | Q/K 6  |
|                  | K46         | 99,9 | K46         | 99,8 | K46              | 99,9 | K46          | 99,9 | K46          | 99,9 | K46         | 99,9 | K46              | 99,9 | K 3    |
|                  |             |      | G48         | 21,1 |                  |      | G48          | 59,4 |              |      | N60         | 80,3 | N60              | 95,9 |        |
|                  |             |      |             |      |                  |      | S60          | 68,0 |              |      | G48         | 33,1 | G48              | 56,9 |        |
|                  | P58         | 33,7 |             |      |                  |      |              |      | P58          | 20,1 |             |      | P58              | 25,7 |        |
| Base T6          | K46         | 99,6 | K46         | 99,9 | K46              | 99,9 | K46          | 99,9 | K46          | 99,9 | K46         | 99,9 | K46              | 99,9 | K 3    |
|                  |             |      | Y47         | 84,6 | Y47              | 64,2 | Y47          | 61,2 | Y47          | 99,5 | Y47         | 57,8 | Y47              | 75,5 | Y 4    |
|                  | Q49         | 83,9 | Q49         | 90,2 |                  |      | Q49          | 99,9 | Q49          | 97,0 |             |      | Q49              | 99,9 | Q/K 6  |
|                  | G48         | 21,6 | G48         | 71,7 | G48              | 61,3 |              |      | G48          | 77,1 | G48         | 50,8 | G48              | 25,9 |        |
|                  |             |      |             |      | R45              | 53,6 |              |      | R45          | 56,9 |             |      |                  |      |        |
|                  |             |      |             |      | K49              | 99,8 |              |      |              |      | K49         | 99,4 |                  |      |        |
|                  |             |      |             |      |                  |      | S60          | 47,5 |              |      |             |      | N60              | 87,2 |        |



Supplementary Table 3|

| DNA of consensus | W1 cDBD [%] |      | W11 DBD [%] |      | W11 DBD_Q29K [%] |      | W33 cDBD [%] |      | W33 nDBD [%] |      | W50 DBD [%] |      | W50 DBD_K26Q [%] |      | Fig. 7 |
|------------------|-------------|------|-------------|------|------------------|------|--------------|------|--------------|------|-------------|------|------------------|------|--------|
| Backbone G7      |             |      | Q49         | 65,3 | K49              | 98,2 | Q49          | 52,8 | Q49          | 92,8 | K49         | 96,2 | Q49              | 62,5 | Q/K 6  |
|                  |             |      |             |      |                  |      |              |      | G48          | 32,3 |             |      |                  |      |        |
|                  |             |      |             |      |                  |      |              |      | Q51          | 20,5 |             |      |                  |      |        |
| Base G7          |             |      | Q49         | 47,4 | K49              | 93,1 | Q49          | 98,8 | Q49          | 83,4 | K49         | 88,5 | Q49              | 99,6 | Q/K 6  |
|                  |             |      |             |      |                  |      | G48          | 29,1 | G48          | 37,8 |             |      | G48              | 58,7 |        |
|                  |             |      |             |      |                  |      | Y47          | 44,6 | Y47          | 86,9 |             |      | Y47              | 29,1 |        |
|                  |             |      |             |      |                  |      |              |      | R45          | 25,3 |             |      |                  |      |        |
|                  |             |      |             |      |                  |      |              |      | K46          | 25,5 |             |      |                  |      |        |
| Base A8          |             |      | Y47         | 66,0 | Y47              | 76,3 | Y47          | 38,8 | Y47          | 75,2 |             |      |                  |      |        |
|                  |             |      |             |      | R45              | 41,3 |              |      | R45          | 57,5 |             |      |                  |      |        |
| Base A20         |             |      | G48         | 38,6 | G48              | 32,5 | G48          | 31,2 | G48          | 27,3 |             |      | G48              | 62,1 |        |
| Base A19         |             |      |             |      | R45              | 47,8 |              |      | R45          | 48,1 |             |      |                  |      |        |
|                  |             |      |             |      | R45              | 56,5 |              |      |              |      |             |      |                  |      |        |
| Base C18         |             |      | K46         | 21,1 | K46              | 32,5 |              |      |              |      |             |      | K46              | 26,7 |        |
| Backbone T17     |             |      |             |      |                  |      | R45          | 22,1 |              |      | R45         | 56,8 | R45              | 50,6 |        |
|                  |             |      |             |      |                  |      |              |      |              |      |             |      |                  |      |        |
|                  |             |      |             |      |                  |      |              |      |              |      |             |      |                  |      |        |
| Base T17         | Y47         | 70,3 | Y47         | 73,7 | Y47              | 73,3 | Y47          | 81,5 | Y47          | 68,3 | Y47         | 92,5 | Y47              | 99,7 | Y 4    |
|                  |             |      |             |      | R45              | 46,0 | R45          | 44,8 | R45          | 69,0 |             |      | R45              | 32,1 |        |
|                  | K46         | 22,7 |             |      |                  |      |              |      |              |      | K46         | 39,0 | K46              | 66,3 |        |
| Backbone G16     | R63         | 95,7 | K63         | 73,1 | K63              | 83,3 | K63          | 99,8 | K63          | 97,2 | K63         | 91,2 | K63              | 91,5 | K/R 8  |
|                  |             |      | F67         | 28,8 |                  |      | Y47          | 70,1 |              |      | Y47         | 80,2 | Y47              | 78,3 |        |
|                  |             |      |             |      |                  |      | R45          | 99,9 | R45          | 21,9 | R45         | 99,9 | R45              | 99,9 |        |
|                  |             |      | R68         | 36,0 |                  |      |              |      | K72          | 68,7 |             |      | K72              | 42,1 |        |
| Base G16         | R63         | 67,7 | K63         | 46,3 | K63              | 59,2 | K63          | 95,9 | K63          | 67,4 | K63         | 50,4 | K63              | 55,7 | K/R 8  |
|                  | Y47         | 77,4 | Y47         | 32,9 | Y47              | 41,8 | Y47          | 64,4 | Y47          | 41,5 | Y47         | 94,0 | Y47              | 97,8 |        |
|                  |             |      |             |      |                  |      | R45          | 99,2 | R45          | 26,3 | R45         | 99,5 | R45              | 93,1 |        |
|                  |             |      |             |      |                  |      |              |      | K72          | 38,5 |             |      | K72              | 27,9 |        |
|                  |             |      | R68         | 25,8 |                  |      |              |      |              |      |             |      |                  |      |        |

| DNA of consensus | W1 cDBD [%] |      | W11 DBD [%] |      | W11 DBD_Q29K [%] |      | W33 cDBD [%] |      | W33 nDBD [%] |      | W50 DBD [%] |      | W50 DBD_K26Q [%] |      | Fig. 7 |
|------------------|-------------|------|-------------|------|------------------|------|--------------|------|--------------|------|-------------|------|------------------|------|--------|
| Backbone G15     | R63         | 99,9 | K63         | 99,9 | K63              | 99,8 | K63          | 99,9 | K63          | 69,5 | K63         | 82,8 | K63              | 80,8 | K/R 8  |
|                  | K72         | 99,9 |             |      |                  |      | R72          | 99,9 | K72          | 99,9 | K72         | 99,9 | K72              | 99,9 | K/R 9  |
|                  | Y47         | 99,9 | Y47         | 22,1 | Y47              | 27,9 | Y47          | 99,9 | Y47          | 20,1 | Y47         | 99,9 | Y47              | 89,4 |        |
|                  |             |      |             |      |                  |      | R45          | 96,9 |              |      | R45         | 96,5 | R45              | 97,2 |        |
|                  |             |      | R73         | 90,9 | R73              | 85,6 |              |      |              |      |             |      |                  |      |        |
|                  |             |      |             |      |                  |      |              |      | K89          | 94,9 |             |      |                  |      |        |
|                  | H74         | 21,8 |             |      |                  |      | V71          | 45,1 |              |      |             |      |                  |      |        |
|                  |             |      |             |      |                  | E90  | 35,3         |      |              |      |             |      |                  |      |        |
| Base G15         | K72         | 64,7 |             |      |                  |      | R72          | 99,9 | K72          | 99,8 | K72         | 99,4 | K72              | 97,9 | K/R 9  |
|                  | Y47         | 99,1 |             |      | Y47              | 28,5 | Y47          | 99,9 |              |      | Y47         | 99,1 | Y47              | 78,8 |        |
|                  | R63         | 78,0 | K63         | 94,2 | K63              | 89,7 | K63          | 99,2 |              |      |             |      |                  |      |        |
|                  |             |      | R73         | 64,6 | R73              | 53,0 |              |      |              |      |             |      |                  |      |        |
|                  |             |      |             |      |                  |      |              |      | K89          | 92,0 |             |      |                  |      |        |

| DNA next to consensus | W1 cDBD [%] |      | W11 DBD [%] |      | W11 DBD_Q29K [%] |      | W33 cDBD [%] |      | W33 nDBD [%] |      | W50 DBD [%] |      | W50 DBD_K26Q [%] |      |
|-----------------------|-------------|------|-------------|------|------------------|------|--------------|------|--------------|------|-------------|------|------------------|------|
| Backbone A2           | R45         | 58,2 | R45         | 83,7 | R45              | 26,9 |              |      |              |      |             |      |                  |      |
|                       |             |      |             |      |                  |      |              |      |              |      | K43         | 84,3 |                  |      |
| Backbone A3           | R43         | 68,0 | S43         | 58,5 | S43              | 38,4 | R43          | 86,8 | N43          | 92,4 | K43         | 99,8 | K43              | 98,4 |
|                       | R45         | 99,9 | R45         | 93,9 | R45              | 84,9 |              |      | R45          | 52,9 |             |      |                  |      |
|                       |             |      | W44         | 56,5 | W44              | 27,1 | W44          | 24,6 | W44          | 47,9 | W44         | 71,9 | W44              | 22,6 |
|                       |             |      |             |      |                  | I37  | 22,5         | K37  | 69,3         |      |             |      |                  |      |
| Base A3               | R45         | 94,8 | R45         | 90,8 | R45              | 74,2 |              |      |              |      |             |      |                  |      |
|                       |             |      |             |      |                  |      | R43          | 25,7 |              |      | K43         | 96,6 |                  |      |
| Backbone G4           | W44         | 65,1 | W44         | 92,2 | W44              | 81,1 | W44          | 95,2 | W44          | 90,0 | W44         | 97,6 | W44              | 96,5 |
|                       | I37         | 98,0 | I37         | 99,9 | I37              | 54,7 | I37          | 99,1 | K37          | 99,9 | V37         | 99,9 | V37              | 99,8 |
|                       | Y62         | 23,8 | Y62         | 89,4 | Y62              | 47,5 | Y62          | 97,8 | Y62          | 72,6 | Y62         | 93,3 | Y62              | 89,4 |
|                       |             |      | K46         | 97,7 | K46              | 98,8 | K46          | 97,7 | K46          | 99,9 | K46         | 99,7 | K46              | 98,8 |
|                       |             |      | S43         | 75,8 | S43              | 65,0 | R43          | 65,7 | N43          | 63,0 | K43         | 69,3 | K43              | 76,3 |
|                       | R45         | 75,4 | R45         | 81,7 | R45              | 77,1 | R45          | 38,0 | R45          | 61,8 | R45         | 27,4 | R45              | 25,2 |
|                       |             |      |             |      |                  |      |              | E39  | 20,8         |      |             |      |                  |      |

| DNA next to consensus | W1 cDBD [%] |      | W11 DBD [%] |      | W11 DBD_Q <sup>29</sup> K [%] |      | W33 cDBD [%] |      | W33 nDBD [%] |      | W50 DBD [%] |      | W50 DBD_K <sup>26</sup> Q [%] |      |
|-----------------------|-------------|------|-------------|------|-------------------------------|------|--------------|------|--------------|------|-------------|------|-------------------------------|------|
|                       |             |      |             |      |                               |      |              |      |              |      |             |      |                               |      |
| Base G4               | R45         | 33,5 | R45         | 86,6 | R45                           | 76,9 |              |      | R45          | 54,5 | R45         | 29,5 |                               |      |
|                       |             |      | W44         | 37,3 | W44                           | 44,3 | W44          | 39,0 | W44          | 41,8 | W44         | 60,6 | W44                           | 62,4 |
|                       |             |      |             |      |                               |      |              |      | K37          | 99,5 | V37         | 30,5 | V37                           | 40,2 |
|                       |             |      | K46         | 24,3 |                               |      | K46          | 23,3 |              |      | K46         | 24,9 |                               |      |
| Backbone T13          |             |      | K50         | 21,1 | K50                           | 56,8 |              |      | K50          | 34,9 | K50         | 82,0 | K50                           | 34,8 |
|                       |             |      |             |      |                               |      | R72          | 50,2 |              |      |             |      |                               |      |
|                       |             |      |             |      | R73                           | 60,2 |              |      |              |      |             |      |                               |      |
| Base T13              |             |      |             |      | LYS50                         | 48,6 |              |      | LYS50        | 31,3 | LYS50       | 21,4 |                               |      |
| Backbone T14          | LYS72       | 72,3 |             |      |                               |      | ARG72        | 99,9 | LYS72        | 95,4 | LYS72       | 92,8 | LYS72                         | 71,0 |
|                       | TYR47       | 42,9 | TYR47       | 61,4 | TYR47                         | 92,0 | TYR47        | 99,7 | TYR47        | 33,9 | TYR47       | 99,4 | TYR47                         | 77,4 |
|                       | ARG63       | 21,7 | LYS63       | 84,7 | LYS63                         | 72,0 | LYS63        | 95,0 |              |      |             |      |                               |      |
|                       |             |      | ARG73       | 53,6 | ARG73                         | 99,9 |              |      |              |      |             |      |                               |      |
|                       |             |      |             |      | LYS50                         | 46,3 |              |      |              |      | LYS50       | 71,3 | LYS50                         | 25,9 |
|                       |             |      | TYR61       | 37,3 | TYR61                         | 36,8 | TYR61        | 53,8 | TYR61        | 28,1 | TYR61       | 30,8 | TYR61                         | 36,3 |
|                       |             |      |             |      |                               |      | HIS74        | 69,8 |              |      |             |      |                               |      |
|                       |             |      |             |      |                               |      |              |      | LYS89        | 97,6 |             |      |                               |      |
| Base T14              |             |      | TYR47       | 54,2 | TYR47                         | 64,7 | TYR47        | 30,3 | TYR47        | 32,7 | TYR47       | 46,4 | TYR47                         | 34,8 |
|                       | LYS50       | 25,3 |             |      | LYS50                         | 45,0 | LYS50        | 30,1 |              |      | LYS50       | 79,5 | LYS50                         | 42,7 |
|                       |             |      |             |      |                               |      | ARG72        | 99,9 |              |      | LYS72       | 33,7 |                               |      |
|                       |             |      |             |      | ARG73                         | 96,5 |              |      |              |      |             |      |                               |      |

**Supplementary Table 4|** DNA sequences of *At*WRKY used for protein expression. In grey gene specific primers for PCR, in red primer regions for site directed mutagenesis.

| AGI code  | Gene name                       | Coding sequence                                                                                                                                                                                                                                                                                                                             |
|-----------|---------------------------------|---------------------------------------------------------------------------------------------------------------------------------------------------------------------------------------------------------------------------------------------------------------------------------------------------------------------------------------------|
| AT4G31550 | WRKY11 DBD                      | ATGAAGAGAACCGTGAGAGTACCGGCGATAAGTGCAAAGATCGCCGATATTCACCGGACGAATATTCGTGGAGG<br>AAGTACGGACAAAAACCGATCAAGGGCTCACCACACCCACGTGGTTACTACAAGTGCAGTACATTCAGAGGATGT<br>CCAGCGAGGAAAACACGTGGAACGAGCATTAGATGATCCAGCGATGCTTATTTGTGACATACGAAGGAGAGCACCGT<br>CATAACCAATCCGCGATGCAGGAGAATATTTCTTCTTCAGGCATTAATGATTTAGTGTTCCTCGCT                            |
|           | WRKY11<br>DBD_Q <sup>29</sup> K | ATGAAGAGAACCGTGAGAGTACCGGCGATAAGTGCAAAGATCGCCGATATTCACCGGACGAATATTCGTGGAGG<br>AAGTACGGAAAGAAACCGATCAAGGGCTCACCACACCCACGTGGTTACTACAAGTGCAGTACATTCAGAGGATGT<br>CCAGCGAGGAAAACACGTGGAACGAGCATTAGATGATCCAGCGATGCTTATTTGTGACATACGAAGGAGAGCACCGT<br>CATAACCAATCCGCGATGCAGGAGAATATTTCTTCTTCAGGCATTAATGATTTAGTGTTCCTCGCT                            |
| AT2G38470 | WRKY33<br>nDBD                  | ATGAACAATCAAGCTGTATCTTACAATGGAAGAGAGCAAAGGAAAGGAGAGGATGGTTACAATTGGAGAAAGTAC<br>GGACAAAAACAGGTGAAAGGAAGTGAATCCTCGGAGTTACTATAAGTGTACTTTCCCTAATTGTCCAACGAAG<br>AAGAAAAGTGGAGAGATCTTTGGAAGGTCAGATCACAGAGATTGTGTATAAAGGAAGCCACAACCATCCTAAACCT<br>CAGTCTACTAGAAGATCTTCTTCGTCTTCTTCGACTTTTCATTCAGCTGTGTACAATGCCAGTTTG                              |
| AT2G38470 | WRKY33<br>cDBD                  | ATGAGAGAGCCGAGAATCGTAGTGCAGACAACGAGTGATATTGACATTCTTGACGACGGTTACAGATGGAGAAAA<br>TACGGCCAGAAAGTCTGTTAAGGGAAACCCAAATCCAAGAAGCTACTACAAGTGCACAACCATCGGTTGTCCAGTG<br>AGGAAACATGTGGAGAGAGCATCACACGACATGAGAGCAGTAATCACAACCTACGAAGGGAAACACAACCCAGT<br>GTTCTTGCAGCTCGTGGTAGCGGTTACGCCACAAACAGAGCACCACAGGATTCGTCTTCAGTCCCGATTAGACCA<br>GCTGCTATTGCTGGT |
| AT5G26170 | WRKY50 DBD                      | ATGGGGAGAGTTGCGTTCAAGACACGGTCCGAGGTGGAAGTGCTTGACGACGGGTTCAAGTGGAGAAAGTATGGG<br>AAGAAGATGGTGAAGAACAGCCACATCCAAGAACTACTACAAATGTTTCAGTTGATGGCTGTCCCGTGAAGAAA<br>AGGGTTGAACGAGACAGAGATGATCCGAGCTTTGTGATAACAACCTTACGAGGGTTCCCAACACTCAAGCATG<br>AAC                                                                                               |
|           | WRKY50<br>DBD_K <sup>26</sup> Q | ATGGGGAGAGTTGCGTTCAAGACACGGTCCGAGGTGGAAGTGCTTGACGACGGGTTCAAGTGGAGAAAGTATGGG<br>CAAAAGATGGTGAAGAACAGCCACATCCAAGAACTACTACAAATGTTTCAGTTGATGGCTGTCCCGTGAAGAAA<br>AGGGTTGAACGAGACAGAGATGATCCGAGCTTTGTGATAACAACCTTACGAGGGTTCCCAACACTCAAGCATG<br>AAC                                                                                               |

**Supplementary Table 5|** Raw absorbance values of DPI-ELISA screens (cyane/white-probed with protein extract with respective WRKY DBD, orange-controls).

| plate pos. | WRKY11 | WRKY33c | WRKY50 | WRKY33n | plate pos. | WRKY11 | WRKY33c | WRKY50 | WRKY33n |
|------------|--------|---------|--------|---------|------------|--------|---------|--------|---------|
| A1         | 0.65   | 2.1087  | 2.0019 | 0.7856  | C5         | 0.55   | 1.4649  | 0.9164 | 0.5257  |
| A2         | 0.31   | 1.2386  | 0.4032 | 0.4941  | C6         | 0.48   | 1.7079  | 0.8717 | 0.3797  |
| A3         | 0.34   | 0.715   | 0.3096 | 0.5655  | C7         | 0.47   | 0.9457  | 0.3335 | 0.4013  |
| A4         | 0.34   | 1.0465  | 0.5137 | 0.4797  | C8         | 0.46   | 1.2998  | 0.8149 | 0.39    |
| A5         | 0.42   | 1.5477  | 0.9649 | 0.687   | C9         | 0.5    | 1.2396  | 0.3374 | 0.2982  |
| A6         | 0.35   | 1.1817  | 0.8347 | 0.4907  | C10        | 0.46   | 1.6042  | 0.7298 | 0.3533  |
| A7         | 3.4    | 2.9214  | 2.2603 | 1.5161  | C11        | 0.49   | 0.9917  | 0.4909 | 0.4795  |
| A8         | 0.34   | 1.0255  | 1.0788 | 0.5008  | C12        | 0.46   | 1.3099  | 0.7526 | 0.4179  |
| A9         | 0.36   | 0.9935  | 0.3622 | 0.3528  | C13        | 0.52   | 0.8373  | 0.6192 | 0.4314  |
| A10        | 2.66   | 2.9373  | 1.452  | 0.521   | C14        | 2.56   | 2.9322  | 1.8018 | 2.037   |
| A11        | 0.75   | 1.443   | 0.5055 | 0.4389  | C15        | 0.51   | 0.7818  | 0.2777 | 0.4304  |
| A12        | 0.39   | 2.3229  | 0.9817 | 0.526   | C16        | 0.48   | 1.1482  | 0.8958 | 0.4378  |
| A13        | 0.37   | 0.8763  | 0.4218 | 0.4708  | C17        | 0.48   | 0.9231  | 0.2064 | 0.3739  |
| A14        | 0.37   | 1.0922  | 0.5316 | 0.5253  | C18        | 0.52   | 1.1025  | 0.6195 | 0.4511  |
| A15        | 0.37   | 0.8442  | 0.262  | 0.4714  | C19        | 0.5    | 0.8603  | 0.3235 | 0.4946  |
| A16        | 1.54   | 2.9287  | 2.216  | 0.573   | C20        | 0.48   | 0.8328  | 0.5633 | 0.4355  |
| A17        | 0.39   | 1.0181  | 0.4572 | 0.655   | C21        | 0.48   | 0.8188  | 0.3446 | 0.3571  |
| A18        | 0.43   | 1.407   | 0.876  | 0.5396  | C22        | 0.47   | 1.1983  | 0.5032 | 0.4004  |
| A19        | 0.37   | 0.6919  | 0.24   | 0.5131  | C23        | 0.35   | 2.4587  | 0.1884 | 0.7164  |
| A20        | 0.35   | 0.9461  | 0.4049 | 0.5406  | C24        | 0.31   | 0.2648  | 0.2045 | 0.749   |
| A21        | 0.36   | 1.6717  | 0.4284 | 0.4473  | D1         | 0.44   | 1.4032  | 0.6974 | 0.5832  |
| A22        | 0.38   | 1.6638  | 0.8718 | 0.522   | D2         | 0.43   | 1.0473  | 0.2362 | 0.2978  |
| A23        | 3.56   | 2.9385  | 0.1789 | 0.2315  | D3         | 0.45   | 1.1416  | 0.4591 | 0.5333  |
| A24        | 0.44   | 0.686   | 0.1852 | 0.2413  | D4         | 0.46   | 1.2151  | 0.5369 | 0.417   |
| B1         | 0.43   | 1.5361  | 0.4301 | 0.4656  | D5         | 0.46   | 0.923   | 0.5627 | 0.4184  |
| B2         | 0.75   | 1.6075  | 0.5034 | 0.3975  | D6         | 0.46   | 1.3037  | 0.2373 | 0.3658  |
| B3         | 0.42   | 1.7891  | 0.9969 | 0.5299  | D7         | 0.47   | 1.2152  | 0.9535 | 0.3949  |
| B4         | 0.5    | 2.4899  | 0.5656 | 0.4401  | D8         | 0.48   | 0.9409  | 0.3902 | 0.4149  |
| B5         | 0.43   | 1.1999  | 0.4247 | 0.4413  | D9         | 0.47   | 1.2068  | 0.7252 | 0.3459  |
| B6         | 0.44   | 1.261   | 0.385  | 0.463   | D10        | 0.49   | 1.0273  | 0.2412 | 0.335   |
| B7         | 0.46   | 1.7063  | 0.8911 | 0.3858  | D11        | 0.48   | 1.2091  | 0.5932 | 0.4894  |
| B8         | 0.45   | 1.1305  | 0.2684 | 0.3794  | D12        | 0.48   | 1.1695  | 0.5171 | 0.4832  |
| B9         | 0.47   | 1.5526  | 0.6388 | 0.3257  | D13        | 0.49   | 1.0247  | 0.6451 | 0.422   |
| B10        | 0.48   | 1.0746  | 0.2591 | 0.3141  | D14        | 0.49   | 1.0856  | 0.2383 | 0.4043  |
| B11        | 0.45   | 1.3997  | 0.5321 | 0.4081  | D15        | 0.49   | 1.1206  | 0.2878 | 0.7166  |
| B12        | 0.44   | 0.9907  | 0.301  | 0.4124  | D16        | 0.48   | 1.1285  | 0.2378 | 0.4013  |
| B13        | 0.47   | 1.293   | 0.7579 | 0.6162  | D17        | 0.47   | 0.8908  | 0.3826 | 0.4444  |
| B14        | 0.45   | 1.0717  | 0.2066 | 0.397   | D18        | 0.47   | 0.9447  | 0.4083 | 0.3592  |
| B15        | 0.45   | 0.9811  | 0.2691 | 0.5171  | D19        | 0.48   | 0.8713  | 0.2664 | 0.4744  |
| B16        | 0.44   | 1.2349  | 0.235  | 0.3391  | D20        | 0.48   | 0.8604  | 0.1891 | 0.4072  |
| B17        | 0.44   | 0.9865  | 0.402  | 0.4421  | D21        | 0.49   | 1.2708  | 0.4105 | 0.3695  |
| B18        | 0.45   | 1.1709  | 0.4778 | 0.5294  | D22        | 0.5    | 2.6437  | 0.6652 | 0.4364  |
| B19        | 0.44   | 0.927   | 0.2326 | 0.6537  | D23        | 2.66   | 0.4464  | 0.2301 | 1.0625  |
| B20        | 0.43   | 1.0974  | 0.2253 | 0.4322  | D24        | 0.41   | 0.2371  | 0.2001 | 0.8589  |
| B21        | 0.44   | 0.9318  | 0.5018 | 0.4396  | E1         | 0.51   | 1.1687  | 0.398  | 0.5242  |
| B22        | 0.61   | 1.5542  | 0.4053 | 0.4087  | E2         | 0.51   | 1.6186  | 0.5811 | 0.4374  |
| B23        | 2.92   | 2.9113  | 0.1892 | 0.2672  | E3         | 0.64   | 0.8929  | 0.3216 | 0.6321  |
| B24        | 0.46   | 1.6728  | 0.1784 | 0.2494  | E4         | 0.66   | 2.6947  | 1.4331 | 0.476   |
| C1         | 0.52   | 1.9277  | 0.5261 | 0.4913  | E5         | 0.57   | 0.86    | 1.2056 | 0.4371  |
| C2         | 0.42   | 1.3686  | 0.5229 | 0.4208  | E6         | 0.53   | 1.7411  | 0.6932 | 0.4385  |
| C3         | 0.47   | 0.866   | 0.996  | 0.5218  | E7         | 0.55   | 0.8792  | 0.6745 | 0.4593  |
| C4         | 0.49   | 1.8187  | 0.833  | 0.4697  | E8         | 0.52   | 0.8993  | 1.1542 | 0.493   |



## Supplementary Table 5|

| plate pos. | WRKY11 | WRKY33c | WRKY50 | WRKY33n | plate pos. | WRKY11 | WRKY33c | WRKY50 | WRKY33n |
|------------|--------|---------|--------|---------|------------|--------|---------|--------|---------|
| E9         | 0.54   | 0.7245  | 0.2831 | 0.3267  | G16        | 0.49   | 0.785   | 0.9247 | 0.5127  |
| E10        | 0.53   | 1.7528  | 1.0094 | 0.3546  | G17        | 3.47   | 2.9249  | 1.2434 | 1.6722  |
| E11        | 0.55   | 0.794   | 0.488  | 0.4556  | G18        | 0.54   | 1.1164  | 1.2514 | 0.5987  |
| E12        | 0.54   | 1.0115  | 0.5063 | 0.619   | G19        | 0.57   | 0.7773  | 0.2456 | 0.6218  |
| E13        | 2.66   | 2.9255  | 1.3679 | 1.2057  | G20        | 0.51   | 0.8411  | 0.2512 | 0.4461  |
| E14        | 0.56   | 0.8593  | 0.7039 | 0.4528  | G21        | 0.45   | 0.9016  | 0.2841 | 0.4028  |
| E15        | 0.57   | 0.9153  | 0.2512 | 0.386   | G22        | 0.57   | 0.7956  | 0.3691 | 0.5002  |
| E16        | 0.56   | 0.8434  | 0.6268 | 0.4286  | G23        | 0.5    | 1.0569  | 0.2521 | 0.3457  |
| E17        | 0.58   | 0.8598  | 0.2768 | 0.4234  | G24        | 0.47   | 1.1035  | 0.3229 | 0.3917  |
| E18        | 0.56   | 1.2155  | 1.0865 | 0.5233  | H1         | 0.45   | 1.1006  | 0.4653 | 0.7377  |
| E19        | 0.65   | 0.9577  | 0.2674 | 0.6585  | H2         | 0.45   | 0.9116  | 0.2525 | 0.3261  |
| E20        | 0.54   | 1.0039  | 0.321  | 0.6912  | H3         | 0.46   | 1.302   | 0.4611 | 0.4337  |
| E21        | 0.54   | 0.7379  | 0.6305 | 0.4713  | H4         | 0.47   | 0.9088  | 0.3338 | 0.4827  |
| E22        | 0.53   | 0.7899  | 0.266  | 0.4479  | H5         | 0.48   | 2.3     | 0.7959 | 0.6786  |
| E23        | 0.5    | 0.1916  | 0.1633 | 0.191   | H6         | 1.65   | 2.9204  | 0.9447 | 0.4365  |
| E24        | 0.5    | 0.2117  | 0.1719 | 0.2059  | H7         | 0.49   | 1.676   | 0.6405 | 0.3903  |
| F1         | 0.44   | 1.0159  | 0.3889 | 0.6392  | H8         | 0.5    | 1.0477  | 0.3401 | 0.3605  |
| F2         | 0.45   | 0.9799  | 0.2392 | 0.3166  | H9         | 0.5    | 1.4036  | 0.7662 | 0.3224  |
| F3         | 0.46   | 1.1559  | 0.3998 | 0.4448  | H10        | 0.5    | 0.9646  | 0.3098 | 0.3416  |
| F4         | 0.47   | 1.0629  | 0.2131 | 0.3879  | H11        | 0.49   | 1.0989  | 0.3067 | 0.4094  |
| F5         | 0.39   | 2.8839  | 0.5809 | 0.4214  | H12        | 0.5    | 1.4416  | 0.4578 | 0.4109  |
| F6         | 3.19   | 2.9229  | 0.9039 | 0.741   | H13        | 0.51   | 0.9274  | 0.471  | 0.4438  |
| F7         | 0.48   | 1.1258  | 0.3379 | 0.4421  | H14        | 0.52   | 0.9374  | 0.2267 | 0.4132  |
| F8         | 0.49   | 1.0552  | 0.4626 | 0.3923  | H15        | 0.49   | 0.9707  | 0.4115 | 0.5869  |
| F9         | 0.49   | 1.2476  | 0.4936 | 0.2758  | H16        | 0.5    | 0.9424  | 0.3189 | 0.5123  |
| F10        | 0.54   | 1.0073  | 0.2996 | 0.3141  | H17        | 3.15   | 2.9299  | 1.127  | 1.3517  |
| F11        | 0.5    | 1.2425  | 0.9335 | 0.4305  | H18        | 0.49   | 0.9173  | 0.3166 | 0.4779  |
| F12        | 0.5    | 1.7607  | 0.4489 | 0.399   | H19        | 0.51   | 0.822   | 0.2544 | 0.6266  |
| F13        | 0.5    | 0.9305  | 0.5875 | 0.4569  | H20        | 0.51   | 0.8979  | 0.3502 | 0.4728  |
| F14        | 0.52   | 0.8285  | 0.2052 | 0.3995  | H21        | 0.51   | 0.9876  | 0.3872 | 0.441   |
| F15        | 0.51   | 0.9638  | 0.3158 | 0.396   | H22        | 0.51   | 2.6927  | 0.7402 | 0.4342  |
| F16        | 0.53   | 0.9837  | 0.4073 | 0.4159  | H23        | 0.5    | 2.0455  | 0.871  | 0.6013  |
| F17        | 0.5    | 0.8635  | 0.2859 | 0.5327  | H24        | 0.48   | 1.8957  | 0.6408 | 0.4682  |
| F18        | 0.48   | 0.94    | 0.3025 | 0.433   | I1         | 0.56   | 2.8628  | 1.4102 | 0.6238  |
| F19        | 0.5    | 1.0312  | 0.6825 | 0.3772  | I2         | 0.51   | 2.9216  | 1.5723 | 0.5471  |
| F20        | 0.49   | 0.9836  | 0.2177 | 0.4538  | I3         | 0.52   | 0.7957  | 0.3378 | 0.5069  |
| F21        | 0.49   | 1.0824  | 0.4206 | 0.3612  | I4         | 0.57   | 1.3715  | 0.8823 | 0.4173  |
| F22        | 0.5    | 2.7127  | 0.735  | 0.424   | I5         | 0.62   | 1.038   | 0.5385 | 0.5162  |
| F23        | 0.46   | 0.301   | 0.1614 | 0.1854  | I6         | 0.53   | 0.9627  | 0.5085 | 0.4429  |
| F24        | 0.46   | 0.2577  | 0.1728 | 0.1913  | I7         | 2.08   | 2.9273  | 1.8575 | 0.8778  |
| G1         | 0.49   | 1.2954  | 0.4227 | 0.4555  | I8         | 0.63   | 2.1893  | 1.052  | 0.4089  |
| G2         | 0.44   | 1.0151  | 0.6031 | 0.4435  | I9         | 0.56   | 0.8704  | 0.264  | 0.3241  |
| G3         | 0.95   | 2.685   | 0.9866 | 0.9696  | I10        | 0.54   | 1.2714  | 1.1087 | 0.3623  |
| G4         | 0.5    | 1.4666  | 0.7857 | 0.4735  | I11        | 0.56   | 0.8093  | 0.2398 | 0.5186  |
| G5         | 0.55   | 0.8912  | 1.0407 | 0.6088  | I12        | 3.19   | 2.9417  | 1.8507 | 1.5035  |
| G6         | 0.46   | 1.8796  | 1.0263 | 0.4129  | I13        | 0.97   | 1.3258  | 0.7646 | 0.5383  |
| G7         | 0.53   | 1.1582  | 0.4919 | 0.3739  | I14        | 0.58   | 1.7079  | 1.327  | 0.4747  |
| G8         | 1.11   | 2.9349  | 1.0239 | 0.4635  | I15        | 0.59   | 0.802   | 0.2556 | 0.4595  |
| G9         | 0.53   | 1.1515  | 0.453  | 0.3361  | I16        | 0.56   | 0.8983  | 0.8464 | 0.5043  |
| G10        | 0.48   | 1.0463  | 0.668  | 0.3627  | I17        | 1.14   | 1.7543  | 0.6781 | 0.7562  |
| G11        | 0.66   | 1.3021  | 0.7923 | 1.2487  | I18        | 0.56   | 1.5531  | 0.568  | 0.4645  |
| G12        | 0.49   | 0.7998  | 1.0774 | 0.5601  | I19        | 0.59   | 0.7926  | 0.2417 | 0.5658  |
| G13        | 0.73   | 1.088   | 0.3783 | 0.4593  | I20        | 0.56   | 0.9251  | 0.2499 | 0.5039  |
| G14        | 0.51   | 1.187   | 0.789  | 0.4933  | I21        | 0.59   | 0.9995  | 0.5605 | 0.4542  |
| G15        | 0.5    | 0.7654  | 0.4095 | 0.5381  | I22        | 0.56   | 0.9059  | 0.2563 | 0.6446  |

## Supplementary Table 5|

| plate pos. | WRKY11 | WRKY33c | WRKY50 | WRKY33n | plate pos. | WRKY11 | WRKY33c | WRKY50 | WRKY33n |
|------------|--------|---------|--------|---------|------------|--------|---------|--------|---------|
| I23        | 0.55   | 1.192   | 0.4705 | 0.4208  | L6         | 0.64   | 2.1113  | 0.4986 | 0.4695  |
| I24        | 0.51   | 0.8554  | 0.357  | 0.4243  | L7         | 0.6    | 1.4046  | 0.5579 | 0.4722  |
| J1         | 0.55   | 2.9168  | 1.278  | 0.6358  | L8         | 0.59   | 1.4256  | 0.3406 | 0.5041  |
| J2         | 0.55   | 2.9158  | 0.7455 | 0.3691  | L9         | 0.62   | 1.4366  | 0.567  | 0.3242  |
| J3         | 0.51   | 1.3104  | 0.848  | 0.4379  | L10        | 0.61   | 1.1905  | 0.28   | 0.3067  |
| J4         | 0.54   | 0.994   | 0.6318 | 0.527   | L11        | 0.91   | 1.7043  | 1.0802 | 0.823   |
| J5         | 0.53   | 1.4498  | 0.5259 | 0.4059  | L12        | 0.61   | 1.3163  | 0.3624 | 0.4497  |
| J6         | 0.54   | 1.5388  | 0.3557 | 0.448   | L13        | 0.64   | 1.0097  | 0.6754 | 0.4984  |
| J7         | 0.61   | 2.4971  | 1.1101 | 0.4791  | L14        | 1.08   | 2.9091  | 0.4161 | 0.4571  |
| J8         | 0.56   | 1.1818  | 0.3204 | 0.4156  | L15        | 1.15   | 2.5936  | 0.9205 | 0.7156  |
| J9         | 0.55   | 1.7605  | 0.7812 | 0.3608  | L16        | 0.63   | 1.1092  | 0.3619 | 0.4803  |
| J10        | 0.54   | 1.2532  | 0.266  | 0.3194  | L17        | 0.63   | 1.2468  | 0.5405 | 0.5576  |
| J11        | 0.56   | 1.4015  | 0.3976 | 0.4369  | L18        | 0.62   | 1.6265  | 0.3404 | 0.448   |
| J12        | 0.58   | 1.7169  | 0.4682 | 0.4472  | L19        | 0.64   | 1.2396  | 0.3445 | 0.6024  |
| J13        | 0.58   | 0.9766  | 0.5531 | 0.6386  | L20        | 0.64   | 1.0472  | 0.1889 | 0.5099  |
| J14        | 0.57   | 0.9977  | 0.2276 | 0.4409  | L21        | 0.62   | 1.2646  | 0.5437 | 0.4482  |
| J15        | 0.56   | 0.9846  | 0.2741 | 0.5648  | L22        | 0.64   | 2.7513  | 0.7692 | 0.4922  |
| J16        | 0.56   | 1.2026  | 0.2799 | 0.4465  | L23        | 0.63   | 1.0465  | 0.6408 | 0.4297  |
| J17        | 0.58   | 1.0982  | 0.5109 | 0.6684  | L24        | 0.61   | 0.9118  | 0.3368 | 0.3906  |
| J18        | 0.56   | 0.9366  | 0.3254 | 0.5375  | M1         | 0.86   | 0.2445  | 0.2073 | 1.1685  |
| J19        | 0.56   | 1.1327  | 0.2381 | 0.6858  | M2         | 0.5    | 0.2616  | 0.2394 | 1.0377  |
| J20        | 0.69   | 0.9442  | 0.1858 | 0.422   | M3         | 0.66   | 2.1099  | 0.8555 | 0.5084  |
| J21        | 0.55   | 1.0037  | 0.3763 | 0.4481  | M4         | 0.62   | 1.8181  | 0.7729 | 0.4646  |
| J22        | 0.57   | 2.6537  | 0.7369 | 0.4716  | M5         | 0.65   | 1.3564  | 0.5492 | 0.4531  |
| J23        | 0.58   | 1.7667  | 1.4335 | 0.6249  | M6         | 0.64   | 1.0258  | 0.626  | 0.4355  |
| J24        | 0.54   | 0.8265  | 0.3849 | 0.502   | M7         | 0.68   | 1.7127  | 0.6784 | 0.4442  |
| K1         | 3.67   | 2.9238  | 0.1935 | 0.2672  | M8         | 0.66   | 0.9809  | 0.782  | 0.4628  |
| K2         | 0.64   | 1.5079  | 0.1857 | 0.246   | M9         | 0.71   | 1.26    | 0.5927 | 0.2707  |
| K3         | 0.53   | 0.8543  | 0.345  | 0.5607  | M10        | 0.64   | 1.1259  | 0.9565 | 0.2743  |
| K4         | 0.54   | 1.4081  | 0.9064 | 0.4664  | M11        | 0.68   | 1.1702  | 0.5427 | 0.6418  |
| K5         | 0.57   | 0.8258  | 0.3757 | 0.514   | M12        | 0.68   | 1.9474  | 1.1019 | 0.6847  |
| K6         | 0.54   | 1.2773  | 0.8994 | 0.4655  | M13        | 0.69   | 0.8508  | 0.3869 | 0.566   |
| K7         | 0.58   | 1.3272  | 0.4659 | 0.4544  | M14        | 0.7    | 2.2907  | 0.9859 | 0.4889  |
| K8         | 0.65   | 1.9523  | 0.8825 | 0.483   | M15        | 0.68   | 0.873   | 0.3508 | 0.4206  |
| K9         | 0.59   | 1.0097  | 0.4102 | 0.3294  | M16        | 1.46   | 2.8737  | 1.4882 | 0.7079  |
| K10        | 0.56   | 1.5825  | 0.8438 | 0.3643  | M17        | 0.68   | 0.8328  | 0.2899 | 0.451   |
| K11        | 0.59   | 1.0797  | 0.7156 | 0.6308  | M18        | 1.25   | 2.9289  | 0.7882 | 0.5363  |
| K12        | 0.56   | 1.0946  | 1.4962 | 0.5832  | M19        | 0.69   | 0.9197  | 0.4221 | 0.3985  |
| K13        | 1.51   | 1.0054  | 0.4533 | 0.4953  | M20        | 0.67   | 0.9647  | 0.3111 | 0.4066  |
| K14        | 0.58   | 1.7026  | 1.0976 | 0.5422  | M21        | 0.67   | 1.5655  | 0.4766 | 0.4556  |
| K15        | 0.6    | 0.8753  | 0.3752 | 0.4275  | M22        | 0.67   | 1.9315  | 0.9516 | 0.4352  |
| K16        | 0.58   | 0.9735  | 0.4636 | 0.4511  | M23        | 0.65   | 1.2832  | 0.427  | 0.382   |
| K17        | 0.59   | 0.7029  | 0.3627 | 0.4966  | M24        | 0.65   | 1.1104  | 0.4545 | 0.424   |
| K18        | 0.57   | 1.2657  | 0.8913 | 0.5234  | N1         | 2.55   | 0.28    | 0.2763 | 1.6241  |
| K19        | 0.6    | 0.8285  | 0.2719 | 0.5498  | N2         | 0.58   | 0.2561  | 0.1898 | 0.6277  |
| K20        | 0.56   | 0.8724  | 0.2715 | 0.427   | N3         | 0.59   | 2.0283  | 0.8472 | 0.5788  |
| K21        | 0.58   | 1.0593  | 0.64   | 0.4126  | N4         | 0.57   | 1.2355  | 0.3339 | 0.4995  |
| K22        | 0.58   | 0.9453  | 0.6696 | 0.5052  | N5         | 0.57   | 1.6527  | 0.6734 | 0.4994  |
| K23        | 0.56   | 1.2453  | 0.3448 | 0.372   | N6         | 0.58   | 1.7377  | 0.3919 | 0.4817  |
| K24        | 0.58   | 1.1095  | 0.4134 | 0.4412  | N7         | 0.64   | 2.0584  | 0.8301 | 0.4466  |
| L1         | 3.19   | 2.9198  | 0.2164 | 0.3885  | N8         | 0.59   | 1.1211  | 0.2431 | 0.418   |
| L2         | 0.57   | 2.8275  | 0.1674 | 0.2196  | N9         | 0.59   | 1.4247  | 0.7397 | 0.2762  |
| L3         | 1.18   | 2.9083  | 1.7748 | 1.2098  | N10        | 0.58   | 1.0045  | 0.2287 | 0.2404  |
| L4         | 0.58   | 1.6774  | 0.5041 | 0.425   | N11        | 0.63   | 2.0348  | 0.6936 | 0.4968  |
| L5         | 0.68   | 1.6927  | 1.4086 | 0.655   | N12        | 0.6    | 1.5899  | 0.4381 | 0.4424  |

## Supplementary Table 5|

| plate pos. | WRKY11 | WRKY33c | WRKY50 | WRKY33n |
|------------|--------|---------|--------|---------|
| N13        | 0.61   | 1.0815  | 1.0899 | 1.2956  |
| N14        | 0.61   | 1.0298  | 0.2332 | 0.4426  |
| N15        | 0.59   | 0.9294  | 0.2885 | 0.5091  |
| N16        | 0.61   | 0.9083  | 0.2833 | 0.4923  |
| N17        | 0.61   | 1.0739  | 0.4459 | 0.447   |
| N18        | 1.51   | 1.8586  | 0.3903 | 0.4342  |
| N19        | 0.6    | 0.9253  | 0.2959 | 0.4567  |
| N20        | 0.63   | 0.9979  | 0.2032 | 0.4778  |
| N21        | 0.62   | 1.1446  | 0.5035 | 0.5469  |
| N22        | 0.63   | 2.2244  | 0.7179 | 0.504   |
| N23        | 0.62   | 1.2089  | 0.5766 | 0.4461  |
| N24        | 0.63   | 1.5025  | 0.4488 | 0.4394  |
| O1         | 0.54   | 0.2485  | 0.1724 | 0.2075  |
| O2         | 0.54   | 0.2941  | 0.1877 | 0.1968  |
| O3         | 0.59   | 0.8739  | 0.4129 | 0.5076  |
| O4         | 0.55   | 1.3129  | 0.5002 | 0.722   |
| O5         | 0.61   | 1.1988  | 0.5777 | 0.5987  |
| O6         | 0.6    | 2.0991  | 0.736  | 0.4332  |
| O7         | 0.6    | 0.9977  | 0.4812 | 0.5472  |
| O8         | 0.59   | 0.9784  | 1.0338 | 0.4789  |
| O9         | 0.61   | 1.6645  | 0.4552 | 0.2523  |
| O10        | 0.59   | 1.7103  | 0.7999 | 0.2233  |
| O11        | 0.63   | 1.0739  | 0.3808 | 0.4607  |
| O12        | 0.62   | 0.9457  | 1.1145 | 0.5308  |
| O13        | 3.52   | 2.9342  | 0.209  | 0.7375  |
| O14        | 0.6    | 1.4815  | 0.2016 | 0.9249  |
| O15        | 0.61   | 0.8961  | 0.2591 | 0.4328  |
| O16        | 0.59   | 1.3445  | 0.8174 | 0.4574  |
| O17        | 0.64   | 0.8747  | 0.348  | 0.4271  |
| O18        | 0.62   | 0.8779  | 0.8391 | 0.4623  |
| O19        | 0.61   | 0.8494  | 0.3308 | 0.4343  |
| O20        | 0.62   | 0.8286  | 0.3077 | 0.4115  |
| O21        | 0.64   | 0.992   | 0.6357 | 0.412   |
| O22        | 0.62   | 1.9261  | 1.1066 | 0.4494  |
| O23        | 0.62   | 1.6363  | 0.7071 | 0.4029  |
| O24        | 0.6    | 0.924   | 0.4409 | 0.4212  |
| P1         | 0.54   | 0.3206  | 0.1967 | 0.2157  |
| P2         | 0.52   | 0.3362  | 0.1831 | 0.2126  |
| P3         | 0.6    | 1.2877  | 0.6436 | 0.5217  |
| P4         | 0.58   | 0.9659  | 0.357  | 0.4143  |
| P5         | 0.64   | 2.5212  | 0.6444 | 0.6231  |
| P6         | 0.58   | 1.8371  | 0.9255 | 0.3396  |
| P7         | 0.57   | 1.9644  | 1.643  | 0.5132  |
| P8         | 0.55   | 1.3517  | 0.408  | 0.4509  |
| P9         | 0.55   | 1.2409  | 0.7415 | 0.263   |
| P10        | 0.63   | 2.5555  | 0.4477 | 0.2697  |
| P11        | 0.59   | 1.3061  | 0.7654 | 0.5713  |
| P12        | 0.56   | 1.6335  | 0.4102 | 0.4685  |
| P13        | 3.37   | 2.9188  | 0.3031 | 1.6134  |
| P14        | 0.56   | 2.6579  | 0.1919 | 0.7826  |
| P15        | 0.56   | 1.0876  | 0.8063 | 0.4843  |
| P16        | 0.57   | 0.9869  | 0.4621 | 0.4814  |
| P17        | 0.58   | 1.3841  | 0.7187 | 0.4616  |
| P18        | 0.56   | 1.0022  | 0.4289 | 0.4488  |
| P19        | 0.59   | 1.0319  | 0.326  | 0.5179  |

| plate pos. | WRKY11 | WRKY33c | WRKY50 | WRKY33n |
|------------|--------|---------|--------|---------|
| P20        | 0.6    | 0.9272  | 0.2038 | 0.4009  |
| P21        | 0.59   | 0.9757  | 0.4006 | 0.4147  |
| P22        | 0.58   | 2.6696  | 0.7154 | 0.4385  |
| P23        | 0.57   | 1.2768  | 0.6425 | 0.4207  |
| P24        | 0.57   | 1.0932  | 0.3312 | 0.3836  |

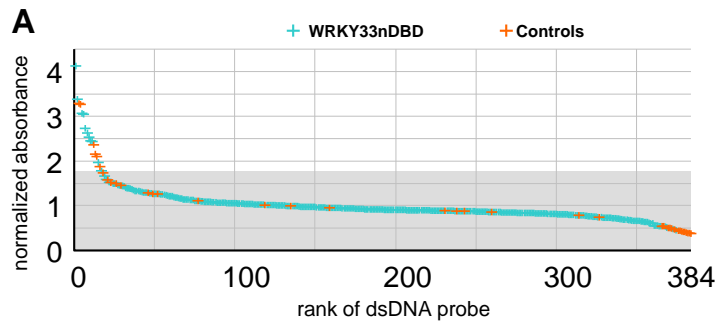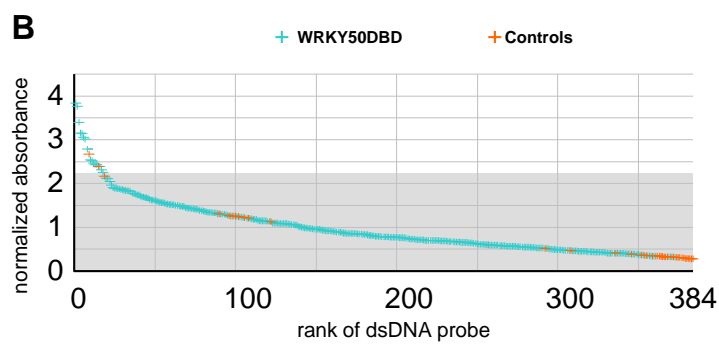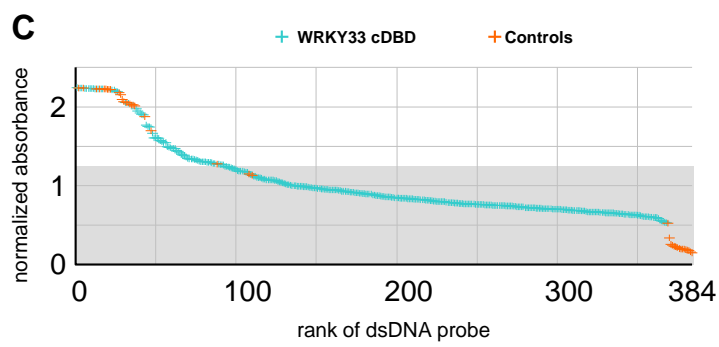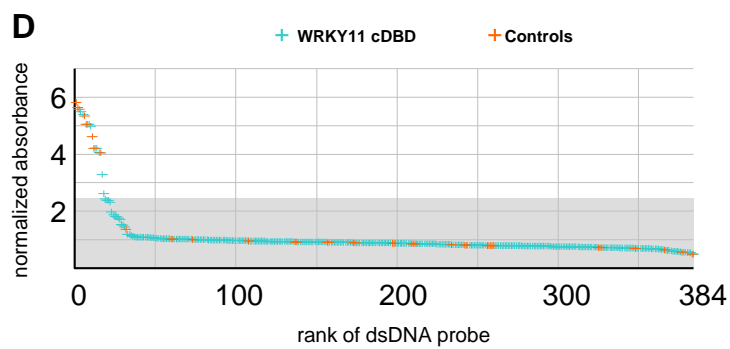

**Supplementary Figure 3|** S-plot diagrams of all four DPI-ELISA screens. The DPI-ELISA screen of WRKY33 nDBD (A), WRKY50 cDBD (B), WRKY33 cDBD (C) and WRKY11 cDBD (D) are shown. The photometric readout of the plates was normalized to the mean and ranked according to its relative normalized absorbance. Control probes: orange; library dsDNA probes: cyan; non-significant background signal is highlighted in grey, confidence level of positively revealed signals:  $p < 0.05$ .

**Supplementary Table 6|** Relative binding values of DPI-ELISA screens. Wells probed with WRKY protein extract are given with dsDNA probe sequences, plate position and binding in percent (raw absorbance values relative to highest - highest value equals 100%), mean, standard deviation and significance threshold are given below individual experiments.

| sense probe 5' – 3'            | antisense probe 5' – 3'                | plate pos. | WRKY 11 | WRKY 33c | WRKY 50 | WRKY 33n |
|--------------------------------|----------------------------------------|------------|---------|----------|---------|----------|
| AAAAAAGTCTAGTCGTA AAAA         | TTTTTACGACTAGACTTTTTTT                 | A1         | 18.73   | 71.68    | 88.57   | 38.57    |
| AAAAAACGGTAAAGTCGACAAAA        | TTTTGTGCGACTTACCGTTTTTT                | C1         | 14.99   | 65.53    | 23.28   | 24.12    |
| AAAAAATTACGTTTGTATTTGTA AAA    | TTTTACAAATACAAACGTAATTTTT              | E1         | 14.70   | 39.73    | 17.61   | 25.73    |
| AAAAAACGATACGGTATCTAGAAAA      | TTTTCTAGATACCGTATCGTTTTTT              | G1         | 14.12   | 44.04    | 18.70   | 22.36    |
| AAAAAATCCCACTTCAATCTAAAA       | TTTTTAGAATGAAGTGGGATTTTTTT             | I23        | 15.85   | 40.52    | 20.82   | 20.66    |
| AAAAAATTACGCGGGATCGCCAAA       | TTTTGGCGATCCCGCGTAATTTTTTT             | K23        | 16.14   | 42.33    | 15.25   | 18.26    |
| AAAAAAGCTTCGCGCCAGCGGAAAA      | TTTTCCCGCTGCGCGCAAGCTTTTTTT            | M23        | 18.73   | 43.62    | 18.89   | 18.75    |
| AAAAATGACCAGGCTCGAGCAAAA       | TTTTTGCTCGAGGCTGGTCATTTTTTT            | O23        | 17.87   | 55.62    | 31.28   | 19.78    |
| AAAAAAGTGCACGTTCAAGAAAA        | TTTTTCTGAACGTTGGCACTTTTTTTT            | A2         | 8.93    | 42.10    | 17.84   | 24.26    |
| AAAAAACCGCGTCGCGCCCGGAAAA      | TTTTCCCGGGCCGCGACGCGGTTTTTTT           | C2         | 12.10   | 46.52    | 23.13   | 20.66    |
| AAAAAAGGGCCACTATCGACGTCAAA     | TTTTGACGTCGATAGTGGGCCCTTTTTTT          | E2         | 14.70   | 55.02    | 25.71   | 21.47    |
| AAAAAAGCTTCTATAGCTCCATGGAAA    | TTTTCCATGGAGCTATAGAAGCTTTTTTTT         | G2         | 12.68   | 34.51    | 26.68   | 21.77    |
| AAAAAACCCGTGTTCGCGCGATAAAAA    | TTTTTTATCGGCGCACACAGGGTTTTTTT          | I24        | 14.70   | 29.08    | 15.79   | 20.83    |
| AAAAAACTCAACTAGTGAACCACCAAAA   | TTTTGGTGGTTCACTAGTTGAGTTTTTTT          | K24        | 16.71   | 37.72    | 18.29   | 21.66    |
| AAAAAATCCGATCGATGCATATATAAAA   | TTTTATATATGCATCGATCGGATTTTTTTT         | M24        | 18.73   | 37.75    | 20.11   | 20.81    |
| AAAAAAGTGTAGATGTAGTTGATAAAA    | TTTTATCAACTACAATCTAACACTTTTTTTT        | O24        | 17.29   | 31.41    | 19.51   | 20.68    |
| AAAAAAGGGCGAGCGCTGGATCCAAAA    | TTTTGTGGATCCAGCGCTCGCCCTTTTTTT         | B1         | 12.39   | 52.22    | 19.03   | 22.86    |
| AAAAATCCTGTTTGGCTTTGATTTAAAA   | TTTTAAAATCAAACGCAACAGGATTTTTTTT        | D1         | 12.68   | 47.70    | 30.85   | 28.63    |
| AAAAATGAATCAATTTTTGGGCTTAAAA   | TTTTAAAGCCCAAAAATTGATTCATTTTTTT        | F1         | 12.68   | 34.53    | 17.21   | 31.38    |
| AAAAAAGTGTACTTATTACTTTAAAA     | TTTTAAAGTATAATAAGTACAACCTTTTTTTT       | H1         | 12.97   | 37.41    | 20.59   | 36.22    |
| AAAAAAGGGAGTCATGCTTCTTGTAAAA   | TTTTAAACAAGAGCATGACTCCCTTTTTTTT        | J23        | 16.71   | 60.06    | 63.42   | 30.68    |
| AAAAATCTTCACCTCACTTCGGTTAAAA   | TTTTAAACCGAAGTGAAGTGAAGATTTTTTTT       | L23        | 18.16   | 35.57    | 28.35   | 21.09    |
| AAAAAAGTTCGTCGTTAACCCAGTTAAAA  | TTTTAAACTGGGTAAAGCACGAACCTTTTTTT       | N23        | 17.87   | 41.10    | 25.51   | 21.90    |
| AAAAAATAAGTCTAGCGCTACGTA AAAA  | TTTTTTACGTACGCGTAGCATTTTTTTTTT         | P23        | 16.43   | 43.40    | 28.43   | 20.65    |
| AAAAAATAAGTCTAGCGCTACGTA AAAA  | TTTTCGGAAGTCCAAATTCGATTTTTTTTTT        | B2         | 21.61   | 54.65    | 22.27   | 19.51    |
| AAAAAATAATTCGAGCCTCGCGTAAAA    | TTTTTACGCGAGGCTCGAAATTTTTTTTTT         | D2         | 12.39   | 35.60    | 10.45   | 14.62    |
| AAAAAAGTGTGCTAGCTCGAGTTCTAAAA  | TTTTAAGAACTCGACGTACCAACCTTTTTTTT       | F2         | 12.97   | 33.31    | 10.58   | 15.54    |
| AAAAATATGTTTTTCGCTTTATTCTTAAAA | TTTTAAGAATAAAGCGAAAAACATTTTTTTT        | H2         | 12.97   | 30.99    | 11.17   | 16.01    |
| AAAAAATCTTTCGCTCGAGATTCTTAAAA  | TTTTAAGAATCTCGACGCAAGATTTTTTTTTT       | J24        | 15.56   | 28.10    | 17.03   | 24.64    |
| AAAAAATAAGCCTGGGGTTCGCATAAAA   | TTTTATGCGAACCCCGAGGCTTTTTTTTTT         | L24        | 17.58   | 31.00    | 14.90   | 19.18    |
| AAAAATCCACGACTCAGCAGCTCTTAAAA  | TTTTAAGAGCTGCTGAGTCTGTGGATTTTTTTT      | N24        | 18.16   | 51.08    | 19.86   | 21.57    |
| AAAAACCTACGATGGTCTGATCTTAAAA   | TTTTAAGATCAGAACCATCGTAGGTTTTTTT        | P24        | 16.43   | 37.16    | 14.65   | 18.83    |
| AAAAATTTTTGTTTTTTCGCTTTTAAAA   | TTTTAAGGAAAAGCAAAAACAAAATTTTTTTT       | A3         | 9.80    | 24.31    | 13.70   | 27.76    |
| AAAAAAGGACATTTTTTCTTTTAAAA     | TTTTCAAAAAGAAAAATGTCCTTTTTTTTTT        | C3         | 13.54   | 29.44    | 44.06   | 25.62    |
| AAAAACCTTCCCTCTTCTGCCTTAAAA    | TTTTAAGCAGAAAGAGGGGAAAGTTTTTTT         | E3         | 18.44   | 30.35    | 14.23   | 31.03    |
| AAAAATTTGGTCTTCGCTCTCGTTAAAA   | TTTTAAGCGAGGACGAAGACCAAAATTTTTTTT      | G3         | 27.38   | 91.27    | 43.65   | 47.60    |
| AAAAAAGCGTTACATCATATGGAAAA     | TTTTTTCCATATGATGTAACGCTTTTTTTTTT       | I3         | 14.99   | 27.05    | 14.94   | 24.88    |
| AAAAATTTACTTTTACCTTTGTGTTAAAA  | TTTTAAGCCAGGATCAAGTATAAAATTTTTTTT      | K3         | 15.27   | 29.04    | 15.26   | 27.53    |
| AAAAAAGCTTCGGAGCTTGAGAAAA      | TTTTTCTCAAGACTCCGAAGCTTTTTTTTTT        | M3         | 19.02   | 71.72    | 37.85   | 24.96    |
| AAAAACTGTCTGTCTATATCACTTAAAA   | TTTTAAGTGATAAGGACAGACAGTTTTTTTTT       | O3         | 17.00   | 29.71    | 18.27   | 24.92    |
| AAAAAACAACCTCCTAATAGCGAAAA     | TTTTCGCTATTAGGAGGTTTTGTTTTTTTTT        | A4         | 9.80    | 35.57    | 22.73   | 23.55    |
| AAAAAAGTTCGACGATTGCGGGTAAAA    | TTTTAACACAAAAGGTAAGGTAAGTAAAAATTTTTTTT | C4         | 14.12   | 61.82    | 36.85   | 23.06    |
| AAAAAAGTTCATTGCTGCTGGTAAAA     | TTTTAACACCAGCAGCAATGACCTTTTTTTTTT      | E4         | 19.02   | 91.60    | 63.40   | 23.37    |
| AAAAAAGTACATGCTAGATAATGTTAAAA  | TTTTAACATTATCTACGCATGTACTTTTTTTT       | G4         | 14.41   | 49.86    | 34.76   | 23.24    |
| AAAAAAGTCTGGCGGGTTGAGAAAA      | TTTTTCTCAACCCCGCCAGAGTTTTTTTTTT        | I4         | 16.43   | 46.62    | 39.03   | 20.49    |
| AAAAACCTTACTGTTGATCTGGTAAAA    | TTTTAACCGAATCAACAGTAAGTTTTTTTTT        | K4         | 15.56   | 47.87    | 40.10   | 22.90    |
| AAAAAAGTTCGACGATTGCGGGTAAAA    | TTTTAACCCGCAATCGTCGGCAACTTTTTTTT       | M4         | 17.87   | 61.80    | 34.19   | 22.81    |
| AAAAATTCACCTGATACTAGGGTAAAA    | TTTTAACCTAGTATCAGGTGCAATTTTTTTT        | O4         | 15.85   | 44.63    | 22.13   | 35.44    |
| AAAAATTCGATTCACCTTAGGTTAAAA    | TTTTAACCTAAGGGTGAAGTGAATTTTTTTT        | B3         | 12.10   | 60.82    | 44.10   | 26.01    |
| AAAAATGTCGATCCGCATGCAGTTAAAA   | TTTTAAGTGCATGCGGATCGACCAATTTTTTTT      | D3         | 12.97   | 38.81    | 20.31   | 26.18    |
| AAAAAAGCTTCGCGCCCGGCTGGCAAAA   | TTTTGCCAGCCGGGGCGACAGTTTTTTTTTT        | F3         | 13.26   | 39.29    | 17.69   | 21.84    |
| AAAAAAGCTCCCTACTACAACGAAAA     | TTTTTCGGTTGTAGTATGGGAGTTTTTTTTT        | H3         | 13.26   | 44.26    | 20.40   | 21.29    |
| AAAAAATACTGCGCACTTGCCTCAAAA    | TTTTGAGTGAAGTGCAGTATTTTTTTTTT          | J3         | 14.70   | 44.55    | 37.52   | 21.50    |
| AAAAAAGTCCGCCCTTAATTCATATAAAA  | TTTTAATATGAATTAAGGGCGGACTTTTTTTT       | L3         | 34.01   | 98.86    | 78.52   | 59.39    |
| AAAAAATTCGTTTTCTGCTTTCAATAAAA  | TTTTAATGAAAGACGAAAAACGAATTTTTTTT       | N3         | 17.00   | 68.95    | 37.48   | 28.41    |

Supplementary Table 6|

| sense probe 5' – 3'              | antisense probe 5' – 3'           | plate pos. | WRKY 11 | WRKY 33c | WRKY 50 | WRKY 33n |
|----------------------------------|-----------------------------------|------------|---------|----------|---------|----------|
| AAAAAAATCTTAGTCTCTATCTCATCAAAA   | TTTTGATGAGATAGAGCTAAGATTTTTTTTT   | P3         | 17.29   | 43.77    | 28.47   | 25.61    |
| AAAAAAATTAGTCTCTTCGCTCCCAAAA     | TTTTGGGAGACGAAGAGACTAATTTTTTTTT   | B4         | 14.41   | 84.64    | 25.02   | 21.61    |
| AAAAAACCCGGTTGGAGAAAATAATTA AAA  | TTTTAATATATTTCTCCAACCGGGTTTTTTT   | D4         | 13.26   | 41.31    | 23.75   | 20.47    |
| AAAAAAATGGTGCCGCTGAGCAAATTA AAA  | TTTTAATTTGCTCAGCGGCACCATTTTTTTTT  | F4         | 13.54   | 36.13    | 9.43    | 19.04    |
| AAAAAATCATTTTATTTGCCTTTCTAAAA    | TTTTAGAAAGGCAAAAATAAAATGATTTTTTT  | H4         | 13.54   | 30.89    | 14.77   | 23.70    |
| AAAAAATCTTCTTGTCTTATTTCTAAAA     | TTTTAGAAATAAGAAA CAAGAAGATTTTTTT  | J4         | 15.56   | 33.79    | 27.95   | 25.87    |
| AAAAAATCTATTCCATTTGCCTTTCTAAAA   | TTTTAGAAGGCGAAATGGAATAGATTTTTTT   | L4         | 16.71   | 57.02    | 22.30   | 20.86    |
| AAAAAAGCCTTACCTTGTCTCTAAAA       | TTTTAGAGGAACAAGGGTAAAGGCTTTTTTT   | N4         | 16.43   | 42.00    | 14.77   | 24.52    |
| AAAAAATCGGGCCCCGTTAGCACTCTAAAA   | TTTTAGAGTGCTAACGGGGCCCCGATTTTTTT  | P4         | 16.71   | 32.83    | 15.79   | 20.34    |
| AAAAAAGTCATTTATAACCCAACTCTAAAA   | TTTTAGAGTTTGGGTTATAATGACTTTTTTT   | A5         | 12.10   | 52.61    | 42.69   | 33.73    |
| AAAAAATATCGGGCACGCTTGTCTAAAA     | TTTTAGACAAGACCGTGCCCGATATTTTTTT   | C5         | 15.85   | 49.80    | 40.54   | 25.81    |
| AAAAAAGGGTCTTTTCCAATGTCTAAAA     | TTTTAGACATTTGAAAAGGACCCTTTTTTTT   | E5         | 16.43   | 29.23    | 53.34   | 21.46    |
| AAAAAATCTTTTTTCTTCAAGGTCTAAAA    | TTTTAGACCTTGAAGAAAAAGAAATTTTTTT   | G5         | 15.85   | 30.30    | 46.04   | 29.89    |
| AAAAAAGTAGTTACTGCGAAAGTCTAAAA    | TTTTAGACTTTCGCAGTAACACTTTTTTTTT   | I5         | 17.87   | 35.29    | 23.82   | 25.34    |
| AAAAAAGTGCCTTACGCTTGTATCTAAAA    | TTTTAGATACAACGCTGAACGCACCTTTTTTT  | K5         | 16.43   | 28.07    | 16.62   | 25.23    |
| AAAAAAGCTCATGGCCCTGAGGATCTAAAA   | TTTTAGATCCTCAGGGCCATGAGCTTTTTTT   | M5         | 18.73   | 46.11    | 24.30   | 22.24    |
| AAAAAATATATTTTCAGCTTTAATCTAAAA   | TTTTAGATTAAAGCTGAAAATATATTTTTTT   | O5         | 17.58   | 40.75    | 25.56   | 29.39    |
| AAAAAATCCCTGCTCCCTGGTTCTCTAAAA   | TTTTAGAACCCAGGGGAGCAGGGATTTTTTT   | A6         | 10.09   | 40.17    | 36.93   | 24.09    |
| AAAAAACCGTCTTATCTCTCGTCCCTAAAA   | TTTTAGGACGAGAGATAAGACGGTTTTTTTT   | C6         | 13.83   | 58.06    | 38.57   | 18.64    |
| AAAAAAGGGTGTCTATTCGTCGACAAAA     | TTTTGTGTCTGACGAATAAGCACCCCTTTTTTT | E6         | 15.27   | 59.19    | 30.67   | 21.53    |
| AAAAAAGGGTCCGGTGCATACATGTA AAA   | TTTTACATGTATGCACCGGACCCTTTTTTTTT  | G6         | 13.26   | 63.90    | 45.41   | 20.27    |
| AAAAAATGTGCTCTGCTCTGCTAAAA       | TTTTAGGCGAGGGCAGAGGCACAATTTTTTT   | I6         | 15.27   | 32.73    | 22.50   | 21.74    |
| AAAAAATCCTATCTTGGCTTTGGCTAAAA    | TTTTAGGCCAAAGCCCAAGATAGGATTTTTTT  | K6         | 15.56   | 43.42    | 39.79   | 22.85    |
| AAAAAAGGTTTGGGCTTACGTTATA AAA    | TTTTATAACGTGAAGCCCAACCTTTTTTTTT   | M6         | 18.44   | 34.87    | 27.70   | 21.38    |
| AAAAAAGCTCGTCTCCGCTCCTGCTAAAA    | TTTTAGCAGGAGGCGGAGACGAGCTTTTTTT   | O6         | 17.29   | 71.36    | 32.56   | 21.27    |
| AAAAAACCGACTGCACGCTGCTGCTAAAA    | TTTTAGCAGCGAGCTGCAGGTCGGTTTTTTTT  | B5         | 12.39   | 40.79    | 18.79   | 21.66    |
| AAAAAATGCACGCTCCTTTCCCGCTAAAA    | TTTTAGCGGAAAGGAGCGTTGCATTTTTTT    | D5         | 13.26   | 31.38    | 24.89   | 20.54    |
| AAAAAATATGTAGCTGCCGTTACGCTAAAA   | TTTTAGCGTAACGGCAGCTACATATTTTTTT   | F5         | 11.24   | 98.04    | 25.70   | 20.69    |
| AAAAAATATTCGCCGTTAGCCACGCTAAAA   | TTTTAGCGTGGTACC GGCGAATATTTTTTT   | H5         | 13.83   | 78.19    | 35.21   | 33.31    |
| AAAAAATCGCACTGCCGCGATGGCTAAAA    | TTTTAGCCATCGGCGGAGTGCATTTTTTTTT   | J5         | 15.27   | 49.28    | 23.27   | 19.93    |
| AAAAAATCTTACTTTTGTCTTTACTAAAA    | TTTTAGTAAAGACAAAAGTAAGAATTTTTTT   | L5         | 19.60   | 57.54    | 62.32   | 32.16    |
| AAAAAACATTCTAGTTCATGTTACTAAAA    | TTTTAGTAAACATGAACTAGGAATGTTTTTT   | N5         | 16.43   | 56.18    | 29.79   | 24.52    |
| AAAAAATCAACCATTATGGTATTACTAAAA   | TTTTAGTAATACCATAATGGTTGATTTTTTT   | P5         | 18.44   | 85.71    | 28.51   | 30.59    |
| AAAAAACCCAGCTCTGTTCTTACTAAAA     | TTTTAGTAGAAACGAGCTGGGTGGTTTTTTTT  | B6         | 12.68   | 42.87    | 17.03   | 22.73    |
| AAAAAAGTATCAAAGCCTAGGGCTGAAAA    | TTTTCAGCCCTAGGCTTTGATACTTTTTTTTT  | D6         | 13.26   | 44.32    | 10.50   | 17.96    |
| AAAAAAGTGGCCGCTAGTCAACTCAAAA     | TTTTTGAGTTGACTAGCGGCCACTTTTTTTTT  | F6         | 91.93   | 99.36    | 39.99   | 36.38    |
| AAAAAAGTCTGCGCTGCAGGGCGGAAAA     | TTTTCCGCCCTGCAGCCGACACTTTTTTTTT   | H6         | 47.55   | 99.28    | 41.80   | 21.43    |
| AAAAAAGTTACCAGTACGCGTCCGGAAAA    | TTTTCCCGACCGCTACTGGTAACTTTTTTTTT  | J6         | 15.56   | 52.31    | 15.74   | 21.99    |
| AAAAAATCAGTCTGAGACTTACA ACTAAAA  | TTTTAGTTGTAAGTCTCAGACTGATTTTTTT   | L6         | 18.44   | 71.77    | 22.06   | 23.05    |
| AAAAAAGTTCGCGGATTTCCGCCATAAAA    | TTTTATGGCCGAAATCCGCGA ACTTTTTTTTT | N6         | 16.71   | 59.07    | 17.34   | 23.65    |
| AAAAAAGTTCCAGGTCCGATGCTCAAAA     | TTTTTGAGCATCGGACCTGGA ACTTTTTTTTT | P6         | 16.71   | 62.45    | 40.95   | 16.67    |
| AAAAAAGTTTGACCTTGGCGTTCTGTA AAA  | TTTTACGAACGCCAAGGTCAA ACTTTTTTTTT | A7         | 97.98   | 99.31    | 100     | 74.43    |
| AAAAAACGGATTCGAACTTTTGTAAAA      | TTTTACAAAAGTTTCAATCCC GTTTTTTTTT  | C7         | 13.54   | 32.15    | 14.75   | 19.70    |
| AAAAAACCTTCTGTTCTGTTCTGTA AAA    | TTTTACAATCGAGAAATAAGAGGTTTTTTTT   | E7         | 15.85   | 29.89    | 29.84   | 22.55    |
| AAAAAAGTGTGTGCTTCTCTGTA AAA      | TTTTACAGAGAGAAGCACAAACTTTTTTTTT   | G7         | 15.27   | 39.37    | 21.76   | 18.36    |
| AAAAAAGTCTAAGGACTTATAGCTGTA AAA  | TTTTACAGCTATAAGTCTTAGACTTTTTTTTT  | I7         | 59.94   | 99.51    | 82.18   | 43.09    |
| AAAAAACAGCTCGGTGCCACTGTGAAAA     | TTTTCCACAGTGGCACCAGGCTGTTTTTTTT   | K7         | 16.71   | 45.12    | 20.61   | 22.31    |
| AAAAAACACTGTATAGCATGGACGAAAA     | TTTTCGTCCATGCTATACAGGTGTTTTTTTT   | M7         | 19.60   | 58.22    | 30.01   | 21.81    |
| AAAAATGCCCTTTTATCTTTATGTA AAA    | TTTTACATAAAGATAAAAAGGCATTTTTTTTT  | O7         | 17.29   | 33.92    | 21.29   | 26.86    |
| AAAAAACGTTATGTATATCTATATGTA AAA  | TTTTACATATAGATATACATACGGTTTTTTTT  | A8         | 9.80    | 34.86    | 47.73   | 24.59    |
| AAAAAACATCCACCCCGCGCGGAAAA       | TTTTCGCGCCGCGGGTGTGGATGTTTTTTTT   | C8         | 13.26   | 44.19    | 36.05   | 19.15    |
| AAAAAAGTTCTGCTTTCCCTTTCTGTA AAA  | TTTTACGAAAGGGAAGCAGAAACTTTTTTTTT  | E8         | 14.99   | 30.57    | 51.06   | 24.20    |
| AAAAAAGCGCTGACTGTAACTCGTA AAA    | TTTTACGAGTTACAGTCAAGCCTTTTTTTTT   | G8         | 31.99   | 99.77    | 45.30   | 22.75    |
| AAAAAATACGCTACGTGGTTGTGTA AAA    | TTTTACGACAACCAGTACGCTATTTTTTTTT   | I8         | 18.16   | 74.42    | 46.54   | 20.07    |
| AAAAAAGCTAAGCCTTGACAGTCTGTA AAA  | TTTTACGACTGTCAAGGCTTACGCTTTTTTTTT | K8         | 18.73   | 66.37    | 39.04   | 23.71    |
| AAAAAACCATCTCTTCTGTTCCATCGTA AAA | TTTTACGATGGAACGAAGGATGGGTTTTTTTT  | M8         | 19.02   | 33.34    | 34.60   | 22.72    |
| AAAAACTTCTAGTTTATGCTTCCGTAAAA    | TTTTACGGAAGCATAACTAGAAGTTTTTTTT   | O8         | 17.00   | 33.26    | 45.74   | 23.51    |
| AAAAAACCTTCTGTTCCCTGTTCCGTA AAA  | TTTTACGGGAACAGGGGACAGAAGTTTTTTTT  | B7         | 13.26   | 58.00    | 39.42   | 18.94    |
| AAAAAACCGGTTGTGAATGTGGAAGAAAA    | TTTTCTTCCACATTCACAACCCGTTTTTTTT   | D7         | 13.54   | 41.31    | 42.18   | 19.39    |
| AAAAAATCGTAAATGCCATAGCCGTA AAA   | TTTTACGGCTATGGGCATTTACGATTTTTTTTT | F7         | 13.83   | 38.27    | 14.95   | 21.70    |
| AAAAAACCGTGTATAGTATTAGTGA AAA    | TTTTCACTAATACTATGACACCGTTTTTTTT   | H7         | 14.12   | 56.97    | 28.34   | 19.16    |
| AAAAAATCAGCTGACTGTGGCGTAAAA      | TTTTACGCCCAAGTACGGCTGATTTTTTTTT   | J7         | 17.58   | 84.89    | 49.11   | 23.52    |
| AAAAAACGCTATATATTGGTGTAGAAAA     | TTTTCTAGCACCAATATATAGCGTTTTTTTT   | L7         | 17.29   | 47.75    | 24.68   | 23.18    |
| AAAAAACGCTCAAGTCTATCAGTAGAAAA    | TTTTCTACTGATAGACTTGAGCGTTTTTTTT   | N7         | 18.44   | 69.97    | 36.73   | 21.92    |

Supplementary Table 6|

| sense probe 5' – 3'             | antisense probe 5' – 3'          | plate<br>pos. | WRKY  | WRKY  | WRKY  | WRKY  |
|---------------------------------|----------------------------------|---------------|-------|-------|-------|-------|
|                                 |                                  |               | 11    | 33c   | 50    | 33n   |
| AAAAAATTCGCGTGTATGTGTACGTAAAA   | TTTTACGTACACATACACGCGGAATTTTT    | P7            | 16.43 | 66.78 | 72.69 | 25.19 |
| AAAAAAGCTAGTGTGCCACCAACGTAAAA   | TTTTACGTTGGTGGCAGCACTAGCTTTTT    | B8            | 12.97 | 38.43 | 11.87 | 18.63 |
| AAAAAATACTCTTCCCTCGTTCCTGGTAAAA | TTTTACCAAGAACGAGGAAGAGTATTTTT    | D8            | 13.83 | 31.98 | 17.26 | 20.37 |
| AAAAAAGGAAAACGAGTTCATCTGGTAAAA  | TTTTACCAGATGAACCTCGTTTTCTTTTT    | F8            | 14.12 | 35.87 | 20.47 | 19.26 |
| AAAAAACTCACGGCGTCACTATGGTAAAA   | TTTTACCATAGTGACGCGGTGAGTTTTTT    | H8            | 14.41 | 35.62 | 15.05 | 17.70 |
| AAAAAACACAGCATTAGGCTATCGGTAAAA  | TTTTACCGATAGCCTAATGCTGTGTTTT     | J8            | 16.14 | 40.17 | 14.18 | 20.40 |
| AAAAAACCGATTACCATTTTTACTGAAAA   | TTTTCAGTAAAAATGGTAATCGTTTTTT     | L8            | 17.00 | 48.46 | 15.07 | 24.75 |
| AAAAAATAGACGCTACACTTACGGTAAAA   | TTTTACCGTAAGTGTAGCGTCTAATTTTT    | N8            | 17.00 | 38.11 | 10.76 | 20.52 |
| AAAAAACCCGGCCGATGGTAGTAAAA      | TTTTTACTACCATGGCGGCCGGTTTTTT     | P8            | 15.85 | 45.95 | 18.05 | 22.14 |
| AAAAAACCCGTGCCCTATTGCAAAAA      | TTTTTGCAATAGGCAGGCACGGTTTTTT     | A9            | 10.37 | 33.77 | 16.02 | 17.32 |
| AAAAAACGCAACTCCGGATGTTGGGTAAAA  | TTTTACCCACATCCGGAGTTGCGTTTTTT    | C9            | 14.41 | 42.14 | 14.93 | 14.64 |
| AAAAACGTTAACACTGATTTAGGGTAAAA   | TTTTACCCTAAATCAGTGTAAACGTTTT     | E9            | 15.56 | 24.63 | 12.52 | 16.04 |
| AAAAAAGGTAGTCACATTACGAGGGTAAAA  | TTTTACCCTCGTAATGTGACTACCTTTTT    | G9            | 15.27 | 39.14 | 20.04 | 16.50 |
| AAAAATAAACGTGTTTACTACTTAGTAAAA  | TTTTACTAAGTATGAACACGTTTATTTTT    | I9            | 16.14 | 29.59 | 11.68 | 15.91 |
| AAAAAACTATAGTCTTTGTCATGATAAAAA  | TTTTTATCATGACAAAGACTATAGTTTTTT   | K9            | 17.00 | 34.32 | 18.15 | 16.17 |
| AAAAATAGCGACTTCGACTCTCAGTAAAA   | TTTTACTGAGAGTCAAGTTCGCTATTTTT    | M9            | 20.46 | 42.83 | 26.22 | 13.29 |
| AAAAATAGTGTGATGGTATCCAGTAAAA    | TTTTACTGGATACCAATCACACTATTTTT    | O9            | 17.58 | 56.58 | 20.14 | 12.39 |
| AAAAAACTCTAGGTCATATTTATCAAAA    | TTTTGAATAATATGACCTAGAGTTTTTT     | A10           | 76.66 | 99.85 | 64.24 | 25.58 |
| AAAAAACTCTCGGGTACAATTGCAAAAA    | TTTTTGCAATTTGACCCGGAGAGTTTTTT    | C10           | 13.26 | 54.53 | 32.29 | 17.34 |
| AAAAAACTTTCTATTTCTGGATAAGTAAAA  | TTTTACTTATCCAGAATAAGAAAGTTTTTT   | E10           | 15.27 | 59.58 | 44.66 | 17.41 |
| AAAAAATCGTTGTTATCGTATTTTAAAA    | TTTTATAAATACGATAACAACGATTTTTTT   | G10           | 13.83 | 35.57 | 29.55 | 17.81 |
| AAAAAATCTTACCCCTCCGTTCTATAAAA   | TTTTTATAGAAGCGGAGGGTAAAGTTTTTT   | I10           | 15.56 | 43.22 | 49.05 | 17.79 |
| AAAAAACCACTCTCTTTCGGACTATAAAA   | TTTTTATAGTCCGAAAGAGAGTTGGTTTT    | K10           | 16.14 | 53.80 | 37.33 | 17.88 |
| AAAAAATGTCATCTGCGTCTGTATAAAA    | TTTTATACAGACGCAAGATGGACATTTTT    | M10           | 18.44 | 38.27 | 42.32 | 13.47 |
| AAAAAAGTACGGATGCCCGCGCTATAAAA   | TTTTTATACGCGGGGATCCGTACTTTTTTT   | O10           | 17.00 | 58.14 | 35.39 | 10.96 |
| AAAAAAGGTAATGCCGGTCCAGTATAAAA   | TTTTTACTGGGACCGGCATTACCTTTTTTT   | B9            | 13.54 | 52.78 | 28.26 | 15.99 |
| AAAAAATATCCTATTCTAATTTATATAAAA  | TTTTTATATAAATTAGAATAGGATATTTTT   | D9            | 13.54 | 41.02 | 32.08 | 16.98 |
| AAAAAATATTTGAGCTAGGTTATCAAAAA   | TTTTTGATAACCTAGCTCAAATATTTTTTT   | F9            | 14.12 | 42.41 | 21.84 | 13.54 |
| AAAAAATCACAATACCTTCTCGTCATAAAA  | TTTTATGACGAGAAGGATTTGTGATTTTT    | H9            | 14.41 | 47.71 | 33.90 | 15.83 |
| AAAAAAGAAATACCAGAACTATCATAAAA   | TTTTATGATAGTTTCTGGTATTTCTTTTT    | J9            | 15.85 | 59.85 | 34.56 | 17.71 |
| AAAAAATGATGGCAATGCTCGCAAAAA     | TTTTTTGCGAGCATTGGCAATCATTTTTTT   | L9            | 17.87 | 48.84 | 25.09 | 15.92 |
| AAAAAATGATTTGAGATCTCCGAGAAAA    | TTTTCTCGGAGATCTGCAAATCATTTTTTT   | N9            | 17.00 | 48.43 | 32.73 | 13.56 |
| AAAAAATGCTTGCCCTGTCTCCATAAAA    | TTTTATGGAGACAGGGCAAGCAGTTTTTT    | P9            | 15.85 | 42.18 | 32.81 | 12.91 |
| AAAAAATGTAATCGTGTCCACTCCATAAAA  | TTTTATGGAGTGGACAGCAATACATTTTTTT  | B10           | 13.83 | 36.53 | 11.46 | 15.42 |
| AAAAAATCTCACTCTGGTCCCATATAAAA   | TTTTATGGGACCAGGAGTGAGATTTTTTT    | D10           | 14.12 | 34.92 | 10.67 | 16.45 |
| AAAAAATGCGCCCTTCTGACATAAAAA     | TTTTTTATGTGAGAAAGGGCGCATTTTTTT   | F10           | 15.56 | 34.24 | 13.25 | 15.42 |
| AAAAAATTTGTACTTTAAGTTTACATAAAA  | TTTTTATGTAACCTTAAAGTACAAATTTTT   | H10           | 14.41 | 32.79 | 13.71 | 16.77 |
| AAAAAATGTTCAAGCTCGATCTACAAAA    | TTTTGTAGATCGAGCTTGAACATTTTTTT    | J10           | 15.56 | 42.60 | 11.77 | 15.68 |
| AAAAAATCAGGTTTCGACTCCAGCAAAA    | TTTTGCTGGAGTTCGAAACCGTATTTTTTT   | L10           | 17.58 | 40.47 | 12.39 | 15.06 |
| AAAAAATCATCCTATTGTTGCTGTCAAAA   | TTTTGACAGCAACAATAGGATGATTTTTTT   | N10           | 16.71 | 34.15 | 10.12 | 11.80 |
| AAAAACGGTCCGATCGTTAATGATAAAA    | TTTTTATCATTACGATCGCGACCGTTTTTT   | P10           | 18.16 | 86.87 | 19.81 | 13.24 |
| AAAAAATGCTAATCGGTGACCCGATAAAA   | TTTTATCGGGTACCGATTAGCAGTTTTTT    | A11           | 21.61 | 49.05 | 22.36 | 21.55 |
| AAAAAAGTCCATAAATAAATGGATAAAA    | TTTTATCCAATTTAGTTTATGGACTTTTTTT  | C11           | 14.12 | 33.71 | 21.72 | 23.54 |
| AAAAAATCAGATATTATTTACCCGAAAA    | TTTTCGGGTCCAGAAATATAGGATTTTTTT   | E11           | 15.85 | 26.99 | 21.59 | 22.37 |
| AAAAAAGTCTCACCTTTAGTCTTAATAAAA  | TTTTATTAAGACTAAAGGTGAGACTTTTTTT  | G11           | 19.02 | 44.26 | 35.05 | 61.30 |
| AAAAAATTTGATCATACTTCAAGTAAAA    | TTTTCAACTGAAGTATGATACAATTTTTTT   | I11           | 16.14 | 27.51 | 10.61 | 25.46 |
| AAAAAATATTCGCTTTTGGCTGAATAAAA   | TTTTATTCAGCCAAAAGCGGAATTTTTTT    | K11           | 17.00 | 36.70 | 31.66 | 30.97 |
| AAAAAATTCATGCTAATTTAACCTAAAA    | TTTTTAAGGTTAAATAGCATGAATTTTTTT   | M11           | 19.60 | 39.78 | 24.01 | 31.51 |
| AAAAAATTCGCAACCTTACGTTTCAAAA    | TTTTCGAACGTTGAGGTTGCGAATTTTTTT   | O11           | 18.16 | 36.51 | 16.85 | 22.62 |
| AAAAAAGACCGCAGCAAGAAATAAATAAAA  | TTTTATTTAATTTCTGTGCTGGTCTTTTTTT  | A12           | 11.24 | 78.96 | 43.43 | 25.82 |
| AAAAAATGGAAGGAGGGATGAAATAAAA    | TTTTATTTTATCCTCTCCTTCCATTTTTTT   | C12           | 13.26 | 44.53 | 33.30 | 20.52 |
| AAAAAATTTTGTGTTTAAATTTGGAAAA    | TTTTCCAAAATTAATAAATAAATTTTTTT    | E12           | 15.56 | 34.38 | 22.40 | 30.39 |
| AAAAAATCCTTTTCTCTTTCTGTTTCAAAA  | TTTTGAAAACAGAAAGAGAAAAGGATTTTTTT | G12           | 14.12 | 27.19 | 47.67 | 27.50 |
| AAAAAATACATTTGACTTTGGGTTTCAAAA  | TTTTGAAACCCAAAGTCAAATGATTTTTTT   | I12           | 91.93 | 100   | 81.88 | 73.81 |
| AAAAAATTTCTCCTTCTTTGTTCTTCAAAA  | TTTTGAGAACAAGAAGGAGAAATTTTTTT    | K12           | 16.14 | 37.21 | 66.19 | 28.63 |
| AAAAAATAGTCTGATTCATCTTCAAAA     | TTTTGAAGATTGAATCAGGACTAATTTTTTT  | M12           | 19.60 | 66.20 | 48.75 | 33.61 |
| AAAAAATCTGTTCTCGTTTCCCTTCAAAA   | TTTTGAAGGGGAAACGAGAACAGATTTTTTT  | O12           | 17.87 | 32.15 | 49.31 | 26.06 |
| AAAAAATAAATCGCGGCTACTGTTTCAAAA  | TTTTGAAGCAGTAGCCGCAATTTATTTTTTT  | B11           | 12.97 | 47.58 | 23.54 | 20.03 |
| AAAAAATGGTCTCATTCTACTTCAAAA     | TTTTGAAGTAGAAATGAGAACCAATTTTTTT  | D11           | 13.83 | 41.10 | 26.24 | 24.03 |
| AAAAAACCCAGATTCCAGCAGTTCAAAA    | TTTTGAAGTCTGGAATCTGGGGTTTTTTT    | F11           | 14.41 | 42.24 | 41.30 | 21.13 |
| AAAAACACTGCATATTGGGAGTTCAAAA    | TTTTGAAGTCCCAATAGTGCAGTGTTTTTTT  | H11           | 14.12 | 37.36 | 13.57 | 20.10 |
| AAAAACCGGCAGTATTGGATATTCAAAA    | TTTTGAATATCCAAATCGTCCGGTTTTTTT   | J11           | 16.14 | 47.64 | 17.59 | 21.45 |
| AAAAAAGTCTGCGTCTTACCCATCAAAA    | TTTTGAATGGGATAGGACGAGACTTTTTTT   | L11           | 26.22 | 57.94 | 47.79 | 40.40 |
| AAAAAAGAAATGTCAGTGCCAAACAAA     | TTTTGTTGGGACTGCAATTTCTTTTTTTT    | N11           | 18.16 | 69.17 | 30.69 | 24.39 |



Supplementary Table 6|

| sense probe 5' – 3'            | antisense probe 5' – 3'         | plate pos. | WRKY 11 | WRKY 33c | WRKY 50 | WRKY 33n |
|--------------------------------|---------------------------------|------------|---------|----------|---------|----------|
| AAAAATCCATGTTTAAAGCTGGTCTCAAAA | TTTTGAGACCAGCTTAAACATGGATTTTT   | P11        | 17.00   | 44.40    | 33.86   | 28.05    |
| AAAAAAGTGTGCCCGTCCCATCTCAAAA   | TTTTGAGATGGGACGGGACACAGTTTTTT   | B12        | 12.68   | 33.68    | 13.32   | 20.25    |
| AAAAAATCTTAGTTAGATTACCTCAAAA   | TTTTGAGGTGAATCTAACTAAGAATTTTT   | D12        | 13.83   | 39.76    | 22.88   | 23.72    |
| AAAAACGCCGGACAATCAGGCGCTCAAAA  | TTTTGAGCGCTGATTTGCCGCGTTTTTT    | F12        | 14.41   | 59.85    | 19.86   | 19.59    |
| AAAAACACTCACACCTATACGGCTCAAAA  | TTTTGAGCCGTATAGGTGTGAGTGTTTTT   | H12        | 14.41   | 49.01    | 20.25   | 20.17    |
| AAAAAATCTGCTCCTCCGTTTACTCAAAA  | TTTTGAGTAAAACGGAGGAGCAAGTTTTTT  | J12        | 16.71   | 58.36    | 20.71   | 21.95    |
| AAAAAAGAGTGGTTTATTAATGTATAAAA  | TTTTTATACATTAATAAACACTCTTTTTT   | L12        | 17.58   | 44.75    | 16.03   | 22.08    |
| AAAAATCGGTACGCACCCCGGACTCAAAA  | TTTTGAGTCCGCGGTGCGTACCGATTTTTT  | N12        | 17.29   | 54.05    | 19.38   | 21.72    |
| AAAAATAAGTAACCGAAGAACTCAAAA    | TTTTGAGTTTCGTTCCGTTACTTATTTTTT  | P12        | 16.14   | 55.53    | 18.15   | 23.00    |
| AAAAAGACACTCTAATTCGCTAGGCAAAA  | TTTTGCCCTACGGAATTAGAGTGTCTTTTTT | A13        | 10.66   | 29.79    | 18.66   | 23.11    |
| AAAAATCCGTTCCATTTGTCGCTCAAAA   | TTTTGACGGACAATGGGAACGGATTTTTT   | C13        | 14.99   | 28.46    | 27.39   | 21.18    |
| AAAAATGGTCGTCTACTCGTGGTCAAAA   | TTTTGACCACGAGTACGACGACCATTTTTT  | E13        | 76.66   | 99.45    | 60.52   | 59.19    |
| AAAAACTACAACCTGCGCGGTGGTCAAAA  | TTTTGACCACCGCGCAGGTTGTAGTTTTTT  | G13        | 21.04   | 36.99    | 16.74   | 22.55    |
| AAAAATGGAAGACCTATACCGGTCAAAA   | TTTTGACCGGTATAGGTCTTTCCATTTTTT  | I13        | 27.95   | 45.07    | 33.83   | 26.43    |
| AAAAATATCTGATCCAATTTAGGTCAAAA  | TTTTGACCTAAATGGATCAGATATTTTTT   | K13        | 43.52   | 34.18    | 20.05   | 24.32    |
| AAAAAGATGATTAGTAATTGCGGAAAAA   | TTTTTTCCGCAATTAATAATCATCTTTTTT  | M13        | 19.88   | 28.92    | 17.12   | 27.79    |
| AAAAATATGGCACTCGCCGCACATCAAAA  | TTTTGATGTGCGCGGAGTGCCATATTTTTT  | L21        | 17.87   | 42.99    | 24.05   | 22.00    |
| AAAAAGATCTAGGCCTTGGGACTCAAAA   | TTTTTGAGTCCCAAGGCTAGATCTTTTTT   | A14        | 10.66   | 37.13    | 23.52   | 25.79    |
| AAAAAGATGACTCGTCTTACTCGAAAAA   | TTTTTCGAGTAAGACGAGTCAATCTTTTTT  | C14        | 73.78   | 99.68    | 79.72   | 100      |
| AAAAACTCCCTCTCCTCTGCTTCCAAAA   | TTTTGGAAGACAGAGGAGAGGGAGTTTTTT  | E14        | 16.14   | 29.21    | 31.14   | 22.23    |
| AAAAAGGAAGTACTGACGATCTGGAAAAA  | TTTTTCCAGATCGTCACTTCTTTTTTT     | G14        | 14.70   | 40.35    | 34.91   | 24.22    |
| AAAAATTCCTGTCGCTCTCGCTCCAAAA   | TTTTGGAGCGAGAGCGGACAGGAATTTTTT  | I14        | 16.71   | 58.06    | 58.71   | 23.30    |
| AAAAATCTAATCTAGCCTATGTCAAAAA   | TTTTGGACATAGGCTAAGTTAGAATTTTTT  | K14        | 16.71   | 57.88    | 48.56   | 26.62    |
| AAAAAGGACGTCTTCGCTATGAGTAAAA   | TTTTCACTCATAACCGAAGACGCTCTTTTTT | M14        | 20.17   | 77.87    | 43.62   | 24.00    |
| AAAAAGCTGTCACGTAGTCCGCTCAAAA   | TTTTGGACCGACTACAGTGACAGCTTTTTT  | N21        | 17.87   | 38.91    | 22.28   | 26.85    |
| AAAAATCCATTCTTCGCTTTATCCAAAA   | TTTTGGATAAACCGGAAGAATGGATTTTTT  | B13        | 13.54   | 43.95    | 33.53   | 30.25    |
| AAAAAGTGTGTGGCTCAGGATTCAAAAA   | TTTTGGGAATCCTGAGCCACACACTTTTTT  | D13        | 14.12   | 34.83    | 28.54   | 20.72    |
| AAAAACCTCTGTCTCTGCTCTCCAAAA    | TTTTGGGAGAGCAGAGACAAGAGTTTTTT   | F13        | 14.41   | 31.63    | 25.99   | 22.43    |
| AAAAACCTTACCTATCCCTATCCAAAA    | TTTTGGGATAGGGATAGGTAAGTTTTTT    | H13        | 14.70   | 31.53    | 20.84   | 21.79    |
| AAAAACTTCCCTCTGCTCTCCAAAA      | TTTTGGGAGGACAAGGAGGGAAGTTTTTT   | J13        | 16.71   | 33.20    | 24.47   | 31.35    |
| AAAAATTTGCGCTTCACTCTGCCAAAA    | TTTTGGGCGAGATGAAGCGCAATTTTTT    | L13        | 18.44   | 34.32    | 29.88   | 24.47    |
| AAAAATTTCTATTTTCACTTTGCCAAAA   | TTTTGGGCAAGATGAATAGAAAATTTTTT   | N13        | 17.58   | 36.76    | 48.22   | 63.60    |
| AAAAATAATATCGATACTCATGCCAAAA   | TTTTGGGCATGAGTATCGATATATTTTTT   | P21        | 17.00   | 33.17    | 17.72   | 20.36    |
| AAAAAGGGTATACCTCGCAGCCCTAAAA   | TTTTTAGGGCTCGGATATACCTTTTTTT    | B14        | 12.97   | 36.43    | 9.14    | 19.49    |
| AAAAAGGGTCGCTGTGAGCTCATGAAAA   | TTTTTCATGAGCTCACAGCGACCTTTTTT   | D14        | 14.12   | 36.90    | 10.54   | 19.85    |
| AAAAAGGGTTAGATGTCTTCAAAAAA     | TTTTTTGAAGACATCTAAACCCTTTTTT    | F14        | 14.99   | 28.16    | 9.08    | 19.61    |
| AAAAAGGGTTGTGCGGAATTGCCAAAA    | TTTTCGGCAATTCGCCACAAACCCTTTTTT  | H14        | 14.99   | 31.87    | 10.03   | 20.28    |
| AAAAAGCATATCTCAGAACTTGCCAAAA   | TTTTGGCAAGTCTGAAGATATGCTTTTTT   | J14        | 16.43   | 33.92    | 10.07   | 21.64    |
| AAAAAGGCGCTGCTAGTTGCGGAGAAAA   | TTTTCTCCCAACTACGACCGCCTTTTTT    | L14        | 31.12   | 98.89    | 18.41   | 22.44    |
| AAAAAGGCCACGGTAACCCCTTTGAAAA   | TTTTCAAAGGGGTTACCGTGGCCTTTTTT   | N14        | 17.58   | 35.01    | 10.32   | 21.73    |
| AAAAAGGCCGTTGACCTCGGTCAAAAA    | TTTTTAGACCGAGTCCAACCGCCTTTTTT   | B22        | 17.58   | 52.83    | 17.93   | 20.06    |
| AAAAAGGCCTTCGCTCGTGTTCGAAAA    | TTTTCGTAAACACGAGCGAAGGCCTTTTTT  | A15        | 10.66   | 28.70    | 11.59   | 23.14    |
| AAAAAGGCTGTGGCAATGTTGTAAAAA    | TTTTTACGAACATGGCCACAGCCTTTTTT   | C15        | 14.70   | 26.58    | 12.29   | 21.13    |
| AAAAAGGCTCCGGCCCAATCGCAAAAA    | TTTTTGGCATTTGGGGCCGGAGCCTTTTTT  | E15        | 16.43   | 31.11    | 11.11   | 18.95    |
| AAAAAGGCTTCCACTTTGAGTTTGAAAA   | TTTTGCAAACTCAAAGTGAAGCCTTTTTT   | G15        | 14.41   | 26.02    | 18.12   | 26.42    |
| AAAAAGCCCTTGCCTCTCTACAAAA      | TTTTGGTAGAGAGGCGCAAGGGCCTTTTTT  | I15        | 17.00   | 27.26    | 11.31   | 22.56    |
| AAAAAGTGTGAGGAAGTTGGGTATGAAAA  | TTTTCCATACCAACTTCTCACCTTTTTT    | K15        | 17.29   | 29.75    | 16.60   | 20.99    |
| AAAAATTTGTGGTGTTCGCAAAAAA      | TTTTGGTGGCAGAAACCCACAAAATTTTTT  | M15        | 19.60   | 29.68    | 15.52   | 20.65    |
| AAAAATAGGCGTTATGCGTAAACCAAAA   | TTTTGGTGTTAGCCATAACCGCTATTTTTT  | O15        | 17.58   | 30.46    | 11.46   | 21.25    |
| AAAAAGGTCAGTCCAGTCCATCAGAAAA   | TTTTCTGATGACGTGGACTGGACCTTTTTT  | A16        | 44.38   | 99.56    | 98.04   | 28.13    |
| AAAAAGGTCGACGATCACCAGGAAAA     | TTTTTCCGCGTATCGTCCAGACCTTTTTT   | C16        | 13.83   | 39.03    | 39.63   | 21.49    |
| AAAAAGGTTAGCCATGCCTGTGCAAAA    | TTTTGCACAGGCATGGGCTAAACCCTTTTTT | E16        | 16.14   | 28.67    | 27.73   | 21.04    |
| AAAAATTACTTCTCCTTCTCTTGCAAAA   | TTTTGCAAAGGAAGGGAGAAAGTAATTTTTT | G16        | 14.12   | 26.69    | 40.91   | 25.17    |
| AAAAATCCCCCGTTTCACTTTGCAAAA    | TTTTGCAAGAGTGAACGGGGGATTTTTT    | I16        | 16.14   | 30.54    | 37.45   | 24.76    |
| AAAAATCGGGATCCGGCGGTGCAAAA     | TTTTGCAACCGCCCGATCCCGATTTTTT    | K16        | 16.71   | 33.09    | 20.51   | 22.15    |
| AAAAAGTCTTACCGTATGCGTCAAAA     | TTTTGCACGCATACGTGTAACGACTTTTTT  | M16        | 42.07   | 97.69    | 65.84   | 34.75    |
| AAAAATCTGATCTGTACCCTATGCAAAA   | TTTTGCATAGGGTACAGATACGAATTTTTT  | O16        | 17.00   | 45.70    | 36.16   | 22.45    |
| AAAAAGTTATATATACCTGATCTCGAAAA  | TTTTGCGAGATCAGGTATAAATAACTTTTTT | B15        | 12.97   | 33.35    | 11.91   | 25.39    |
| AAAAACAGTTCGATGTACCCCGCAAAA    | TTTTGCGGGGTGACATCGAACTGTTTTTT   | D15        | 14.12   | 38.09    | 12.73   | 35.18    |
| AAAAAGCGGTAGATGCGCAACTGTGAAAA  | TTTTCACAGTTGCGCATCTACCGCTTTTTT  | F15        | 14.70   | 32.76    | 13.97   | 19.44    |
| AAAAAGCGGAATCTAGAACTATAAAAA    | TTTTTATAGTTCTAGAATTCGCGCTTTTTT  | H15        | 14.12   | 33.00    | 18.21   | 28.81    |
| AAAAAGCGCCCGCACTGTTAATAAAAA    | TTTTTATTAACAGTTCGGGCGCGCTTTTTT  | J15        | 16.14   | 33.47    | 12.13   | 27.73    |
| AAAAACTGACCGTACGCGCCACGCAAAA   | TTTTGCGTGGGCGTGCAGGTCAGTTTTTT   | L15        | 33.14   | 88.17    | 40.72   | 35.13    |
| AAAAATCTAGGGTACCTATTGGCAAAA    | TTTTGCCAAATAGGTACCCCTAGATTTTTT  | N15        | 17.00   | 31.59    | 12.76   | 24.99    |

Supplementary Table 6|

| sense probe 5' – 3'            | antisense probe 5' – 3'       | plate pos. | WRKY 11 | WRKY 33c | WRKY 50 | WRKY 33n |
|--------------------------------|-------------------------------|------------|---------|----------|---------|----------|
| AAAAAAGCCATCATGGTTAGTGACAAAA   | TTTTGTGACTACTAACATGATGGCTTTTT | P15        | 16.14   | 36.97    | 35.67   | 23.78    |
| AAAAAATGCCGAGACCCCATGCCGCAAAA  | TTTTGCCGGCATGGGGTCTCGGCATTTTT | B16        | 12.68   | 41.98    | 10.40   | 16.65    |
| AAAAAAGCCGTGGGTGATGGTCACAGAAAA | TTTTCTGTGACCATCACCCACGGCTTTTT | D16        | 13.83   | 38.36    | 10.52   | 19.70    |
| AAAAAACATTGATAAAATCTCCAGGCAAAA | TTTTGCCTGGAGATTTTATCAATGTTTT  | F16        | 15.27   | 33.44    | 18.02   | 20.42    |
| AAAAAATCTAGCTTTAACTTTAGCAAAA   | TTTTGCTAAAGTAAAAAGCTAGAATTTTT | H16        | 14.41   | 32.04    | 14.11   | 25.15    |
| AAAAAAGCTAGTCGATTCGGCTTAGAAAA  | TTTTTCTAAGCCGAATCGACTAGCTTTTT | J16        | 16.14   | 40.88    | 12.38   | 21.92    |
| AAAAACAACCTGGAGGATTTACAGCAAAA  | TTTTGCTGTAATCCTCCAAGTTGTTTT   | L16        | 18.16   | 37.71    | 16.01   | 23.58    |
| AAAAAAGCTCCCGTCTCTTAGTTTAAAA   | TTTTTAGAACTAAGAGACGGGAGCTTTTT | N16        | 17.58   | 30.88    | 12.53   | 24.17    |
| AAAAAAGCTTCTCATGTTGTCTTAGGAAAA | TTTTCTAAGACAACATGAGAAGCTTTTT  | P16        | 16.43   | 33.55    | 20.44   | 23.63    |
| AAAAAAGCTTCAACATCTCGGTCCAAAA   | TTTTTGAGCGCAGATGTTGAAAGCTTTTT | A17        | 11.24   | 34.61    | 20.23   | 32.16    |
| AAAAACATAACCGCAAAATCCCTACAAAA  | TTTTGTAGGGATTTTGGCGTTATGTTTT  | C17        | 13.83   | 31.38    | 9.13    | 18.36    |
| AAAAAAGTAGGTGCTGATGCTGGCCGAAAA | TTTTCGGCCAGCATCAGCACCTACTTTTT | E17        | 16.71   | 29.23    | 12.25   | 20.79    |
| AAAAAAGTATAACGTGTTGTTGACCGAAAA | TTTTCGGTCAACAACACGTTTACTTTTT  | G17        | 100     | 99.43    | 55.01   | 82.09    |
| AAAAAAGTCGTCACGCACGTGAATACAAAA | TTTTGTATTACGTGCGTGACGACTTTTT  | I17        | 32.85   | 59.64    | 30.00   | 37.12    |
| AAAAAATTTGCTCTTTGGTTTTTCAAAAA  | TTTTGTGAAAAACAAAAGAGCAAATTTTT | K17        | 17.00   | 23.89    | 16.05   | 24.38    |
| AAAAAACCCGCGCTCGTGATTATCAGAAAA | TTTTGTGATAATCACGACGGCGGGTTTT  | M17        | 19.60   | 28.31    | 12.83   | 22.14    |
| AAAAATAATTACAAGTCGGCTCCACAAAA  | TTTTGTGGAGCCGACTTGTAATTATTTTT | O17        | 18.44   | 29.73    | 15.40   | 20.97    |
| AAAAAAGTGCACGCCCAATTATATAAAAA  | TTTTTATATAAATGGTTCGTGCACTTTTT | A18        | 12.39   | 47.83    | 38.76   | 26.49    |
| AAAAAATAGTACCGCTAATGGCTGACAAAA | TTTTGTGAGCCATTAGCGGTACTATTTTT | C18        | 14.99   | 37.48    | 27.41   | 22.15    |
| AAAAAATCTTAAAGAAAGTTCCGACAAAA  | TTTTGTGCGAACTTTCCTTAAGAGTTTT  | E18        | 16.14   | 41.32    | 48.07   | 25.69    |
| AAAAAAGTCCCGCGCTAAGCTTTAAAA    | TTTTTTTAAAGCTTAGCGGGGACTTTTT  | G18        | 15.56   | 37.95    | 55.36   | 29.39    |
| AAAAAATGGTACTCAGAGTTATAGACAAAA | TTTTGTCTATAACTCTGAGTACCATTTTT | I18        | 16.14   | 52.80    | 25.13   | 22.80    |
| AAAAACATGTCGCACCTGTACTAACAAAA  | TTTTGTTAGTACAGGTGCGACATGTTTT  | K18        | 16.43   | 43.03    | 39.43   | 25.69    |
| AAAAACGTTGAACCTGGCCCTCAACAAAA  | TTTTGTTGAGGCCAGGTTCAACGTTTT   | M18        | 36.02   | 99.56    | 34.87   | 26.33    |
| AAAAAAGTTCCGGGGCTTGGTTGGAAAA   | TTTTTTCCAAACCAAGCCCGAACTTTT   | O18        | 17.87   | 29.84    | 37.12   | 22.70    |
| AAAAAATGATGTTGGCGCATTTAAACAAAA | TTTTGTTTAAATGCGCCAACATCATTTTT | B17        | 12.68   | 33.54    | 17.79   | 21.70    |
| AAAAAAGTTTCTACTTGTGTCTGTGAAAA  | TTTTACAGACACAAGTAGGAACTTTTT   | D17        | 13.54   | 30.28    | 16.93   | 21.82    |
| AAAAATCATCTCTATGTTATGTTGAAAA   | TTTTCAACAATAACATAGAGATGATTTTT | F17        | 14.41   | 29.35    | 12.65   | 26.15    |
| AAAAACATCGCTGTGCTTGACGTGAAAA   | TTTTCAAGTCAACGACAGCGATGTTTT   | H17        | 90.78   | 99.60    | 49.86   | 66.36    |
| AAAAAATGGCTCGGGTCCAGGTTGAAAA   | TTTTCAACCTTGAACCCGAGCCATTTTT  | J17        | 16.71   | 37.33    | 22.60   | 32.81    |
| AAAAATAGACCCGTGACCCACCATGAAAA  | TTTTCAATGGTGGTTCAGGGTCTATTTTT | L17        | 18.16   | 42.38    | 23.91   | 27.37    |
| AAAAACACTTAACTGAGTGGGATGAAAA   | TTTTCAATCCCCTCAGTTAAGTGTTTTT  | N17        | 17.58   | 36.51    | 19.73   | 21.94    |
| AAAAAATTAATCCATGCTTATGCTGAAAA  | TTTTCAGACATAAGCATGGATTAATTTTT | P17        | 16.71   | 47.05    | 31.80   | 22.66    |
| AAAAAACCCGTTCTACCTTATTCCTGAAAA | TTTTCAGGAATAAGGTAGAACGGGTTTT  | B18        | 12.97   | 39.80    | 21.14   | 25.99    |
| AAAAACAGGCCGATTCGATCCCGAAAA    | TTTTCCGGGATCGGAATCGGCCTGTTTT  | D18        | 13.54   | 32.11    | 18.06   | 17.63    |
| AAAAACCGATCATACATATCACTGAAAA   | TTTTCAGTGATATGTGATGATCGGTTTT  | F18        | 13.83   | 31.95    | 13.38   | 21.26    |
| AAAAAATTTGTTCCGGCTCATAACTGAAAA | TTTTCAGTTATGAGCCCGAACAAATTTTT | H18        | 14.12   | 31.18    | 14.01   | 23.46    |
| AAAAAATAGCTTATCCTTGCTTGTGAAAA  | TTTTACAAGCAAGGATAAGCTAATTTTT  | J18        | 16.14   | 31.84    | 14.40   | 26.39    |
| AAAAAATTAACCGTTCGACGGCTGTGAAAA | TTTTCACACGCCTTCCGACGGTTAGTTTT | L18        | 17.87   | 55.29    | 15.06   | 21.99    |
| AAAAAACACGCCATTGCACTGGTAAAA    | TTTTTTACCAGTGTCAATGGCGTGTTTTT | N18        | 43.52   | 63.18    | 17.27   | 21.32    |
| AAAAAATATGCTACTCCACCTTGATGAAAA | TTTTCATCAAGTGGAGTAGCATATTTTT  | P18        | 16.14   | 34.07    | 18.98   | 22.03    |
| AAAAAATGCCATTGTACCTGTGTTGAAAA  | TTTTCGAACACAGGTACAATGGCATTTTT | A19        | 10.66   | 23.52    | 10.62   | 25.19    |
| AAAAAATGCTAGACTCGGACATTCGAAAA  | TTTTCGAATGTCGAGTCTAGACATTTTT  | C19        | 14.41   | 29.24    | 14.31   | 24.28    |
| AAAAACGCCTTATGCCTCCCGCTCGAAAA  | TTTTCGAGCGGGAGGACAAAGCGTTTT   | E19        | 18.73   | 32.56    | 11.83   | 32.33    |
| AAAAAACCGCTTACATTGCGTTGTGAAAA  | TTTTCGACAACGCAATGTAAGCGGTTTT  | G19        | 16.43   | 26.42    | 10.87   | 30.53    |
| AAAAAATGTCGGCTGTTAGGATATCGAAAA | TTTTCGATATCTAACAGCCGACATTTTT  | I19        | 17.00   | 26.94    | 10.69   | 27.78    |
| AAAAACGTGCGCGTGCATGTCATCGAAAA  | TTTTCGATGACATGCACGGCAGCTTTTT  | K19        | 17.29   | 28.16    | 12.03   | 26.99    |
| AAAAACGGAAGATCGTACTGCTAGAAAA   | TTTTCTAGCACTCAGCATCTTCCGTTTT  | M19        | 19.88   | 31.26    | 18.67   | 19.56    |
| AAAAAATTCAGAGCTTCGAGGTTCCGAAAA | TTTTCGGAACCTCGAAGCTCTGAATTTTT | O19        | 17.58   | 28.87    | 14.64   | 21.32    |
| AAAAAATGGTTTCAATTTCCGTTCCGAAAA | TTTTCGGACGGAAAATTGAAACCATTTTT | A20        | 10.09   | 32.16    | 17.91   | 26.54    |
| AAAAAATCCAGCGTATCCGACCCGAAAA   | TTTTCGGGTCCGATACGCTGGGAATTTTT | C20        | 13.83   | 28.31    | 24.92   | 21.38    |
| AAAAACTAGGTATCGGTAGGCGCCGAAAA  | TTTTCGGCGCCTACCGATACCTAGTTTT  | E20        | 15.56   | 34.13    | 14.20   | 33.93    |
| AAAAACTCGCCTTGCATCTGTGCGAAAA   | TTTTCGCACAGATGCAAGCGGAGTTTT   | G20        | 14.70   | 28.59    | 11.11   | 21.90    |
| AAAAACGCATCATAGTACGCCCAAAAA    | TTTTTGGGGCGTAGCTATGATGCGTTTT  | I20        | 16.14   | 31.45    | 11.06   | 24.74    |
| AAAAACGCTCCGTTTTTGAATGCGAAAA   | TTTTCGCATTGCAAAAACGGAGCGTTTT  | K20        | 16.14   | 29.66    | 12.01   | 20.96    |
| AAAAAATGTCGCCGTGTGTCTCGGAAAA   | TTTTCGCGAGCACACACGGGCACATTTTT | M20        | 19.31   | 32.79    | 13.76   | 19.96    |
| AAAAACTACTACCTTTGCTAAGCGAAAA   | TTTTCGCTTAGGCAAAGGTAGTGTTTTT  | O20        | 17.87   | 28.17    | 13.61   | 20.20    |
| AAAAAATGCTTCAAGTTTTTGTATTAATA  | TTTTTAAGATCAAAACTGAAAGCGTTTT  | B19        | 12.68   | 31.51    | 10.29   | 32.09    |
| AAAAAATCGTACATCTATCGTACGAAAA   | TTTTCGTAGCGATAGATGTACGAGTTTT  | D19        | 13.83   | 29.62    | 11.79   | 23.29    |
| AAAAAATGCCATGTGCACCCGTACGAAAA  | TTTTCGTACGGGTGCACATGGGCATTTTT | F19        | 14.41   | 35.05    | 30.20   | 18.52    |
| AAAAACGTATTGATGCTATTTCAAAAA    | TTTTTTGAAATAGACATCAATACGTTTT  | H19        | 14.70   | 27.94    | 11.26   | 30.76    |
| AAAAACCAGCTCAGTCTGAACAATA      | TTTTTTGTTCCAGGACTGAGGCTGTTTT  | J19        | 16.14   | 38.50    | 10.53   | 33.67    |
| AAAAACAGTCTACACCGCTGTAGGAAAA   | TTTTCTACAGCGGTGTAGACTGGTTTT   | L19        | 18.44   | 42.14    | 15.24   | 29.57    |
| AAAAACCCTAACGAATGCTTTCCGAAAA   | TTTTCCGAAAAGCATTCGTTAGGGTTTT  | N19        | 17.29   | 31.45    | 13.09   | 22.42    |

Supplementary Table 6

| sense probe 5' – 3'            | antisense probe 5' – 3'         | plate pos.        | WRKY 11      | WRKY 33c     | WRKY 50      | WRKY 33n     |
|--------------------------------|---------------------------------|-------------------|--------------|--------------|--------------|--------------|
| AAAAAACCGAGTGTGGCCAGTTGCAGAAAA | TTTTCTGCAACTGGCAACACTCGGTTTTTT  | P19               | 17.00        | 35.08        | 14.42        | 25.42        |
| AAAAAATCGGGAACGTACGTCCGCGAAAA  | TTTTCCGCGGACGTACGTTCCGCGATTTTTT | B20               | 12.39        | 37.30        | 9.97         | 21.22        |
| AAAAAATGGCACACATGATCTCGGGAAAA  | TTTTCCCAGATCATGTGTGCCAATTTTTT   | D20               | 13.83        | 29.25        | 8.37         | 19.99        |
| AAAAAATCAAAATGATCACTACGGGAAAA  | TTTTCCCGTAGTGATCATTTTGAATTTTTT  | F20               | 14.12        | 33.44        | 9.63         | 22.28        |
| AAAAAATTAATACACACTTGGGGAAAA    | TTTTCCCAAGTGTGTAATAGTAATTTTTT   | H20               | 14.70        | 30.52        | 15.49        | 23.21        |
| AAAAAACCTACATCGCATATAAGAGAAAA  | TTTTCTCTTATATGCGATGTAGGGTTTTT   | J20               | 19.88        | 32.10        | 8.22         | 20.72        |
| AAAAAATTAGGACCACTCCCACTAGGAAAA | TTTTCTAGTGGGGATGGTCCTAATTTTTT   | L20               | 18.44        | 35.60        | 8.36         | 25.03        |
| AAAAAATGTCTTCTTACACCTCTAGAAAA  | TTTTCTAGAGGGTGTAGAAGACATTTTTT   | N20               | 18.16        | 33.92        | 8.99         | 23.46        |
| AAAAAATACGTATATTCAGGCCCTAAAAA  | TTTTTAGGGCCTGAATATACGTAGTTTTT   | P20               | 17.29        | 31.52        | 9.02         | 19.68        |
| AAAAAATGGCGACTGCCAGTGGTAGAAAA  | TTTTTACCACCTGGCAGTCGCCAGTTTTT   | A21               | 10.37        | 56.83        | 18.95        | 21.96        |
| AAAAAATACCTCTACTCTAGCCTTAAAAA  | TTTTTAAGGCTAGAGTAGAGGTAGTTTTT   | C21               | 13.83        | 27.83        | 15.25        | 17.53        |
| AAAAAATGAGAGAATTCGGGTTCAGAAAA  | TTTTCTGAACCGGAAATCTCTCATTTTTT   | E21               | 15.56        | 25.08        | 27.89        | 23.14        |
| AAAAAATGGATGCGCTCACCAGTTAAAAA  | TTTTTAAGTGGTGGAGCGCATCCAGTTTTT  | G21               | 12.97        | 30.65        | 12.57        | 19.77        |
| AAAAAATGGTGTATCTCCTCAATTAAAAA  | TTTTTAATGAGGAGATACACCAGTTTTT    | I21               | 17.00        | 33.98        | 24.80        | 22.30        |
| AAAAAATCGACATAGAATCGGAAAAA     | TTTTTTCCGCATCTATGTGCGAGTTTTT    | L21               | 16.71        | 36.01        | 28.31        | 20.26        |
| AAAAAATCAAAACAACGATGCCGTTAAAAA | TTTTTAACGGCATCGTTGTTTTGATTTTTT  | M21               | 19.31        | 53.22        | 21.09        | 22.37        |
| AAAAAATGTTGTTGCTGTTGGTCTAAAAA  | TTTTTAGGACCAACAGCAACAACATTTTTT  | O21               | 18.44        | 33.72        | 28.12        | 20.23        |
| AAAAAATATCATTGTTACCGTTGCTAAAAA | TTTTTAGCAACGGTAACAATGATATTTTTT  | A22               | 10.95        | 56.56        | 38.57        | 25.63        |
| AAAAAATGGGCTCTGGCCACCCTAAAAA   | TTTTTACGGTGGGCCAGAGCCCATTTTTT   | C22               | 13.54        | 40.73        | 22.26        | 19.66        |
| AAAAAATGGCGTCATAATGTGGTAAAAA   | TTTTTACCACAATATGACGGCAATTTTTT   | E22               | 15.27        | 26.85        | 11.77        | 21.99        |
| AAAAAATGCAGACCTTCAGCTGGGTAAAAA | TTTTTACCAGCTGAAGGTCTGCATTTTTT   | G22               | 16.43        | 27.05        | 16.33        | 24.56        |
| AAAAAATAGTGGCTGCTCGTTCAAAAAA   | TTTTTGTGAACGAGACAGCCAGTATTTTTT  | I22               | 16.14        | 30.80        | 11.34        | 31.64        |
| AAAAAATCCGGCTTGACGCTGCATAAAAAA | TTTTTATGCAGCGTCAAGCCGGAATTTTTT  | K22               | 16.71        | 32.13        | 29.62        | 24.80        |
| AAAAAATTAATCCTAGCCCTCATCAAAAAA | TTTTTGAATGAGGGCTAGGAGTAATTTTTT  | M22               | 19.31        | 65.66        | 42.10        | 21.36        |
| AAAAAATGGATCCTTACTTTAGGCCAAAAA | TTTTTGGCCTAAAGTAAAGATCCATTTTTT  | O22               | 17.87        | 65.48        | 48.96        | 22.06        |
| AAAAAATCGCGTCCGTGCTCAATCAAAAAA | TTTTTGGATTGAGCACGGACGCGATTTTTT  | B21               | 12.68        | 31.68        | 22.20        | 21.58        |
| AAAAAATGCTATCCGTGCTATGCCAAAAA  | TTTTTGGCATAGACAGGATAGCATTTTTT   | D21               | 14.12        | 43.20        | 18.16        | 18.14        |
| AAAAAATGTGGTTACGGCCTCGATGAAAAA | TTTTTCAATCGAGGCCGTAACCAATTTTTT  | F21               | 14.12        | 36.80        | 18.61        | 17.73        |
| AAAAAATGTTTTTTAGAGGTGTGCAAAAAA | TTTTTGTGCACACCTCTAAAAACATTTTTT  | H21               | 14.70        | 33.57        | 17.13        | 21.65        |
| AAAAAATTCGGGACTAGTAGTGGTAAAAA  | TTTTTACCACCTACTAGTCCCGAATTTTTT  | J21               | 15.85        | 34.12        | 16.65        | 22.00        |
| AAAAAAAAAAAAAAAAAAAAAAAAAAAAA  | TTTTTTTTTTTTTTTTTTTTTTTTTTTTTTT | G23               | 14.41        | 35.93        | 11.15        | 16.97        |
| AAAAAAAAAAAAAAAAAAAAAAAAAAAAA  | TTTTTTTTTTTTTTTTTTTTTTTTTTTTTTT | G24               | 13.54        | 37.51        | 14.29        | 19.23        |
| GGGGGGGGGGGGGGGGGGGGGGGGGGGG   | CCCCCCCCCCCCCCCCCCCCCCCCCCCCC   | H23               | 14.41        | 69.53        | 38.53        | 29.52        |
| GGGGGGGGGGGGGGGGGGGGGGGGGGGG   | CCCCCCCCCCCCCCCCCCCCCCCCCCCCC   | H24               | 13.83        | 64.44        | 28.35        | 22.98        |
|                                |                                 | <b>Mean</b>       | <b>18.21</b> | <b>44.61</b> | <b>26.10</b> | <b>24.25</b> |
|                                |                                 | <b>SD</b>         | <b>12.03</b> | <b>18.18</b> | <b>15.64</b> | <b>9.38</b>  |
|                                |                                 | <b>Mean +2xSD</b> | <b>42.26</b> | <b>80.97</b> | <b>57.37</b> | <b>43.02</b> |

**Supplementary Table 7|** Alignment of positive DNA probes of DPI-ELISA screen. Alignment of the DNA sequences of significantly bound dsDNA probes of the DPI-ELISA array experiments. The DNA core consensus was derived using MEME. The data corresponds to Figure 3C, 4A-D and 5A. The name of the dsDNA probe is given first, followed by the respective DNA sequence and the relative absorbance in percent (measured absorbance normalized to the background and relative to highest signal of the respective experiment). If the core consensus was not found in the DNA sequence the forward and the complement reverse strand are given. Black - GAC core used for DNA binding consensus in Figures; grey - other GAC or GTC cores; red - variance of the TTGACY core.

**WRKY33 cDBD vs. WRKY33 nDBD (Fig. 3C)**

Alignment of positives according to WRKY33 nDBD rel. absorbance:

|     |                     |         |                  |                        |       |
|-----|---------------------|---------|------------------|------------------------|-------|
| 202 | AAAAAAGA            | TTGACT  | CGTCTTACTCGAAAAA | 100%                   |       |
| 260 | AAAAAAGTATAACGTGTTG | TTGACC  | GAAAA            | 82.1%                  |       |
| 97  | AAAAAAAGT           | TTGACC  | TTGGCGTTCGTAAAA  | 74.4%                  |       |
| 173 | AAAAAATACAT         | TTGACT  | TTGGGTTTCAAAA    | 73.8%                  |       |
| 276 | AAAAAACATCGCTGTCG   | TTGACG  | TTGAAAA          | 66.4%                  |       |
| 54  | TTTTAATATGAATTAAGGG | CGGACT  | TTTTT            | 59.4%                  |       |
| 195 |                     | TT      | TTGACC           | ACGAGTACGACGACCATTTTTT | 59.2% |
| 36  | TTTTAAGCGAGGACG     | AAAGACC | AAATTTTTT        | 47.6%                  |       |
| 101 | TTTTACAGCTATAAGTCCT | TAGACT  | TTTTT            | 43.1%                  |       |

Alignment of positives according to WRKY33 cDBD rel. absorbance:

|     |                     |         |                  |                        |       |
|-----|---------------------|---------|------------------|------------------------|-------|
| 173 | AAAAAATACAT         | TTGACT  | TTGGGTTTCAAAA    | 100%                   |       |
| 202 | AAAAAAGA            | TTGACT  | CGTCTTACTCGAAAAA | 99.7%                  |       |
| 276 | AAAAAACATCGCTGTCG   | TTGACG  | TTGAAAA          | 99.6%                  |       |
| 101 | TTTTACAGCTATAAGTCCT | TAGACT  | TTTTT            | 99.5%                  |       |
| 195 |                     | TT      | TTGACC           | ACGAGTACGACGACCATTTTTT | 99.4% |
| 260 | AAAAAAGTATAACGTGTTG | TTGACC  | GAAAA            | 99.4%                  |       |
| 97  | AAAAAAAGT           | TTGACC  | TTGGCGTTCGTAAAA  | 99.3%                  |       |
| 54  | TTTTAATATGAATTAAGGG | CGGACT  | TTTTT            | 98.9%                  |       |
| 36  | TTTTAAGCGAGGACG     | AAAGACC | AAATTTTTT        | 91.3%                  |       |

Alignment of positives of only WRKY33 nDBD:

|     |                                 |        |                    |       |
|-----|---------------------------------|--------|--------------------|-------|
| 215 | AAAAAATTTCTATTTTCATCTTTGCCCAAAA |        |                    | 63.6% |
|     | TTTTGGGCAAAGATGAAATAGAAATTTTTT  |        |                    |       |
| 164 | TTTTATT                         | AAGACT | AAAGGTGAGACTTTTTTT | 61.3% |

Alignment of positives of only WRKY33 cDBD:

|     |                                |        |                    |       |
|-----|--------------------------------|--------|--------------------|-------|
| 137 | TTTGAATAATA                    | TTGACC | TAGAGTTTTTTTT      | 99.9% |
| 108 | AAAAAAGGCCT                    | CTGACT | GTAACCTCGTAAAA     | 99.8% |
| 271 | AAAAACGTTGAACCTGGGCCTCAACAAAA  |        |                    | 99.6% |
|     | TTTGTGAGGCCCAGGTTCAACGTTTTTTT  |        |                    |       |
| 233 | TTTTCTGATGACGTGGAC             | TGGACC | TTTTTT             | 99.6% |
| 91  | TTTTTGAG                       | TTGACT | AGCGCCACTTTTTTTT   | 99.4% |
| 92  | TTTTCCGCCCTGCAGCCG             | CAGACT | TTTTTT             | 99.3% |
| 222 | TTTTCTCCCAACT                  | ACGACC | GCCTTTTTT          | 98.9% |
| 83  | AAAAAATATGTAGCTGCCGTTACGCTAAAA |        |                    | 98.0% |
|     | TTTTAGCGTAACGGCAGCTACATTTTTTT  |        |                    |       |
| 239 | TTTTGCACGCATACGTGTA            | ACGACT | TTTTT              | 97.7% |
| 43  | TTTTAACACCAGCAGCA              | ATGACC | TTTTTTTT           | 91.6% |
| 246 | AAAAA                          | CTGACC | GTCAGCGCCCACGCAAAA | 88.2% |
| 160 | TTTTATCATTAACGATC              | GCGACC | GTTTTTT            | 86.9% |
| 88  | AAAAATCAACCATTATGGTATTACTAAAA  |        |                    | 85.7% |
|     | TTTTAGTAATACCATAATGGTTGATTTTTT |        |                    |       |
| 117 | AAAAAAATCAGC                   | CTGACT | CTGGCGTAAAA        | 84.9% |
| 57  | TTTTGGGAGACGAA                 | GAGACT | AATTTTTTTTT        | 84.7% |

**WRKY11 DBD vs. WRKY33 nDBD (Fig. 4A)**Alignment of positives according to WRKY33 nDBD rel. absorbance:

|     |                     |        |                               |       |
|-----|---------------------|--------|-------------------------------|-------|
| 202 | AAAAAAGA            | TTGACT | CGTCTTACTCGAAAAA              | 100%  |
| 260 | AAAAAAGTATAACGTGTTG | TTGACC | GAAAA                         | 82.1% |
| 97  | AAAAAAAGT           | TTGACC | TTGGCGTTCGTAAAA               | 74.4% |
| 173 | AAAAAATACAT         | TTGACT | TTGGGTTTCAAAA                 | 73.8% |
| 276 | AAAAAACATCGCTGTCG   | TTGACG | TTGAAAA                       | 66.4% |
| 195 |                     | TT     | TTGACC ACGAGTACGACGACCATTTTTT | 59.2% |
| 101 | TTTTACAGCTATAAGTCCT | TAGACT | TTTTT                         | 43.1% |

Alignment of positives according to WRKY11 DBD rel. absorbance:

|     |                     |        |                               |       |
|-----|---------------------|--------|-------------------------------|-------|
| 260 | AAAAAAGTATAACGTGTTG | TTGACC | GAAAA                         | 100%  |
| 97  | AAAAAAAGT           | TTGACC | TTGGCGTTCGTAAAA               | 98.0% |
| 173 | AAAAAATACAT         | TTGACT | TTGGGTTTCAAAA                 | 91.9% |
| 276 | AAAAAACATCGCTGTCG   | TTGACG | TTGAAAA                       | 90.8% |
| 195 |                     | TT     | TTGACC ACGAGTACGACGACCATTTTTT | 76.7% |
| 202 | AAAAAAGA            | TTGACT | CGTCTTACTCGAAAAA              | 73.8% |
| 101 | TTTTACAGCTATAAGTCCT | TAGACT | TTTTT                         | 59.9% |

Alignment of positives of only WRKY33 nDBD:

|     |                                 |         |                         |       |
|-----|---------------------------------|---------|-------------------------|-------|
| 215 | AAAAAATTTCTATTTTCATCTTTGCCCAAAA |         |                         | 63.6% |
|     | TTTTGGGCAAAGATGAAATAGAAATTTTTT  |         |                         |       |
| 164 |                                 | TTTTATT | AAGACT AAAGTGAGACTTTTTT | 61.3% |
| 54  | TTTTAATATGAATTAAGGG             | CGGACT  | TTTTT                   | 59.4% |
| 36  | TTTTAAGCGAGGACG                 | AAGACT  | AAATTTTTT               | 47.6% |

Alignment of positives of only WRKY11 DBD:

|     |               |                    |                               |       |
|-----|---------------|--------------------|-------------------------------|-------|
| 91  |               | TTTTTGAG           | TTGACT AGCGGCCACTTTTTTT       | 91.9% |
| 137 |               | TTTTGAATAATA       | TTGACC TAGAGTTTTTTT           | 76.7% |
| 92  |               | TTTTCCGCCCTGCAGCCG | CAGACT TTTTTT                 | 47.6% |
| 233 |               | TTTTCTGATGACGTGGAC | TGGACC TTTTTT                 | 44.4% |
| 198 |               | TT                 | TTGACC TAAATTGGATCAGATATTTTTT | 43.5% |
| 287 | AAAAAACACGCCA | TTGACA             | CTGGTAAAAAA                   | 43.5% |

**WRKY33 nDBD vs. WRKY50 nDBD** (Fig. 4B)

Alignment of positives according to WRKY50 DBD rel. absorbance:

|     |                     |              |                        |       |
|-----|---------------------|--------------|------------------------|-------|
| 97  | AAAAAAAGT           | TTGACC       | TTGGCGTTCGTAAAA        | 100%  |
| 101 | TTTTACAGCTATAA      | GTCCT TAGACT | TTTTT                  | 82.8% |
| 173 | AAAAAATACAT         | TTGACT       | TTGGGTTTCAAAA          | 81.9% |
| 202 | AAAAAAGA            | TTGACT       | CGTCTTACTCGAAAA        | 79.7% |
| 54  | TTTTAATATGAATTAAGGG | CGGACT       | TTTTT                  | 78.5% |
| 195 | TT                  | TTGACC       | ACGAGTACGACGACCATTTTTT | 60.5% |

Alignment of positives according to WRKY33 nDBD rel. absorbance:

|     |                     |              |                        |       |
|-----|---------------------|--------------|------------------------|-------|
| 202 | AAAAAAGA            | TTGACT       | CGTCTTACTCGAAAA        | 100%  |
| 97  | AAAAAAAGT           | TTGACC       | TTGGCGTTCGTAAAA        | 74.4% |
| 173 | AAAAAATACAT         | TTGACT       | TTGGGTTTCAAAA          | 73.8% |
| 54  | TTTTAATATGAATTAAGGG | CGGACT       | TTTTT                  | 59.4% |
| 195 | TT                  | TTGACC       | ACGAGTACGACGACCATTTTTT | 59.2% |
| 101 | TTTTACAGCTATAA      | GTCCT TAGACT | TTTTT                  | 43.1% |

Alignment of positives of only WRKY50 DBD:

|     |                                |                  |                  |       |
|-----|--------------------------------|------------------|------------------|-------|
| 233 | TTTTCTGAT                      | GACGTGGAC TGGACC | TTTTTT           | 98.0% |
| 1   | TTTTTAC                        | GAC TAGACT       | TTTTT            | 88.6% |
| 120 | AAAAAATTCGCGTGTATGTGTACGTAAAA  |                  |                  | 72.7% |
|     | TTTTACGTACACATACACGCGGAATTTTTT |                  |                  |       |
| 174 | AAAAAATTTCTCCTTCTTTGTTCTTCAAAA |                  |                  | 66.2% |
|     | TTTTGAAGAACAAGAAGGAGAAATTTTTT  |                  |                  |       |
| 239 | TTTTGCACGCATACGTGTA            | ACGACT           | TTTTT            | 65.8% |
| 137 | TTTTGAATAATA                   | TTGACC           | TAGAGTTTTTTTT    | 64.2% |
| 21  | TTTTAAACAAGAAGC                | ATGACT           | CCCTTTTTT        | 63.4% |
| 43  | TTTTAACACCAGCAGCA              | ATGACC           | TTTTTTTT         | 63.4% |
| 86  | TTTTAGTA                       | AAGACA           | AAAGTAAGAATTTTTT | 62.3% |
| 205 | TTTTGGAGCGAGAG                 | CGGACA           | GGAATTTTTT       | 58.7% |

Alignment of positives of only WRKY33 nDBD:

|     |                                 |             |                    |       |
|-----|---------------------------------|-------------|--------------------|-------|
| 260 | AAAAAAGTATAACGTGTTG             | TTGACC      | GAAAA              | 82.1% |
| 276 | AAAAAACATCGCT                   | GTCG TTGACG | TTGAAAA            | 66.4% |
| 215 | AAAAAATTTCTATTTTCATCTTTGCCCAAAA |             |                    | 63.6  |
|     | TTTTGGGCAAAAGATGAAATAGAAATTTTTT |             |                    |       |
| 164 | TTTTATT                         | AAGACT      | AAAGGTGAGACTTTTTTT | 61.3% |
| 36  | TTTTAAGCGAG                     | GACG AAGACC | AAATTTTTT          | 47.6% |

**WRKY11 DBD vs. WRKY33 cDBD** (Fig. 4C)

Alignment of positives according to WRKY33 cDBD rel. absorbance:

|     |                     |                   |                  |                  |          |       |
|-----|---------------------|-------------------|------------------|------------------|----------|-------|
| 173 | AAAAAATACAT         | TTGACT            | TTGGGTTTCAAAA    | 100%             |          |       |
| 137 | TTTGAATAATA         | TTGACC            | TAGAGTTTTTTT     | 99.9%            |          |       |
| 202 | AAAAAAGA            | TTGACT            | CGTCTTACTCGAAAAA | 99.7%            |          |       |
| 276 | AAAAACATCGCT        | TTGACG            | TTGAAAA          | 99.6%            |          |       |
| 233 | TTTCTGAT            | TGACGTGGAC        | TGGACC           | TTTTTT           | 99.6%    |       |
| 101 | TTTACAGCTATAA       | GTCCCT            | TAGACT           | TTTTT            | 99.5%    |       |
| 195 |                     | TT                | TTGACC           | ACGAGTACGACGACC  | CATTTTTT | 99.4% |
| 260 | AAAAAAGTATAACGTGTTG | TTGACC            | GAA              |                  |          | 99.4% |
| 91  |                     | TTTTTGAG          | TTGACT           | AGCGGCCACTTTTTTT |          | 99.4% |
| 97  |                     | AAAAAAGT          | TTGACC           | TTGGCGTTCGTAAAA  |          | 99.3% |
| 92  |                     | TTTCCGCCCTGCAGCCG | CAGACT           | TTTTTT           |          | 99.3% |

Alignment of positives according to WRKY11 DBD rel. absorbance:

|     |                     |                   |              |                  |          |       |
|-----|---------------------|-------------------|--------------|------------------|----------|-------|
| 260 | AAAAAAGTATAACGTGTTG | TTGACC            | GAA          | 100%             |          |       |
| 97  |                     | AAAAAAGT          | TTGACC       | TTGGCGTTCGTAAAA  | 98.0%    |       |
| 91  |                     | TTTTTGAG          | TTGACT       | AGCGGCCACTTTTTTT | 91.9%    |       |
| 173 |                     | AAAAAATACAT       | TTGACT       | TTGGGTTTCAAAA    | 91.9%    |       |
| 276 | AAAAACATCGCT        | TTGACG            | TTGAAAA      | 90.8%            |          |       |
| 137 | TTTGAATAATA         | TTGACC            | TAGAGTTTTTTT | 76.7%            |          |       |
| 195 |                     | TT                | TTGACC       | ACGAGTACGACGACC  | CATTTTTT | 76.7% |
| 202 |                     | AAAAAAGA          | TTGACT       | CGTCTTACTCGAAAAA | 73.8%    |       |
| 101 | TTTACAGCTATAA       | GTCCCT            | TAGACT       | TTTTT            | 59.9%    |       |
| 92  |                     | TTTCCGCCCTGCAGCCG | CAGACT       | TTTTTT           | 47.6%    |       |
| 233 | TTTCTGAT            | TGACGTGGAC        | TGGACC       | TTTTTT           | 44.4%    |       |

Alignment of positives of only WRKY33 cDBD:

|     |                                |         |                    |       |
|-----|--------------------------------|---------|--------------------|-------|
| 108 | AAAAAAGGC                      | CTGACT  | GTAACCTCGTAAAA     | 99.8% |
| 271 | AAAAACGTGAACCTGGGCCTCAACAAAA   |         |                    | 99.6% |
|     | TTTTGTTGAGGCCAGGTTCAACGTTTTTT  |         |                    |       |
| 222 | TTTCTCCCAACT                   | ACGACC  | GCCTTTTTT          | 98.9% |
| 54  | TTTAAATATGAATTAAGGG            | CGGACT  | TTTTT              | 98.9% |
| 83  | AAAAAATATGTAGCTGCCGTTACGCTAAAA |         |                    | 98.0% |
|     | TTTGTAGCGTAACGGCAGCTACATTTTTTT |         |                    |       |
| 239 | TTTTGCACGCATACGTGTA            | ACGACT  | TTTTT              | 97.7% |
| 43  | TTTTAACACCAGCAGCA              | ATGACC  | TTTTTTT            | 91.6% |
| 36  | TTTAAAGCGAG                    | AAAGACC | AAATTTTTT          | 91.3% |
| 246 | AAAAAA                         | CTGACC  | GTCAGCGCCCACGCAAAA | 88.2% |
|     | AAAAAA                         | CTGACC  | GTCAGCGCCCACGCAAAA |       |
| 160 | TTTTATCATTAACGATC              | GCCACC  | GTTTTTT            | 86.9% |
| 88  | AAAAAATCAACCATTATGGTATTACTAAAA |         |                    | 85.7% |
|     | TTTTAGTAATACCATAATGGTTGATTTTTT |         |                    |       |
| 117 | AAAAAATCAGC                    | CTGACT  | CTGGGCGTAAAA       | 84.9% |
| 57  | TTTTGGGAGACGAA                 | GAGACT  | AATTTTTTTT         | 84.6% |

Alignment of positives of only WRKY11 DBD:

|     |               |        |            |                        |       |
|-----|---------------|--------|------------|------------------------|-------|
| 198 |               | TT     | TTGACC     | TAAATTGGATCAGATATTTTTT | 43.5% |
| 287 | AAAAAACACGCCA | TTGACA | CTGGTAAAAA | 43.5%                  |       |

**WRKY33 cDBD vs. WRKY50 DBD** (Fig. 4D)Alignment of positives according to WRKY50 DBD rel. absorbance:

|     |                     |        |                         |       |
|-----|---------------------|--------|-------------------------|-------|
| 97  | AAAAAAAGT           | TTGACC | TTGGCGTTCGTAAAA         | 100%  |
| 233 | TTTTCTGATGACGTGGAC  | TGGACC | TTTTTT                  | 98.0% |
| 101 | TTTTACAGCTATAAGTCCT | TAGACT | TTTTTT                  | 82.2% |
| 173 | AAAAAATACAT         | TTGACT | TTGGGTTTCAAAA           | 81.9% |
| 202 | AAAAAAGA            | TTGACT | CGTCTTACTCGAAAAA        | 79.7% |
| 54  | TTTTAATATGAATTAAGGG | CGGACT | TTTTTT                  | 78.5% |
| 239 | TTTTGCACGCATACGTGTA | ACGACT | TTTTTT                  | 65.8% |
| 137 | TTTTGAATAATA        | TTGACC | TAGAGTTTTTTTT           | 64.2% |
| 43  | TTTTAACACCAGCAGCA   | ATGACC | TTTTTTTT                | 63.4% |
| 195 | TT                  | TTGACC | ACGAGTACGACGACCATTTTTTT | 60.5% |

Alignment of positives according to WRKY33 cDBD rel. absorbance:

|     |                     |        |                         |       |
|-----|---------------------|--------|-------------------------|-------|
| 173 | AAAAAATACAT         | TTGACT | TTGGGTTTCAAAA           | 100%  |
| 137 | TTTTGAATAATA        | TTGACC | TAGAGTTTTTTTT           | 99.9% |
| 202 | AAAAAAGA            | TTGACT | CGTCTTACTCGAAAAA        | 99.7% |
| 233 | TTTTCTGATGACGTGGAC  | TGGACC | TTTTTT                  | 99.6% |
| 101 | TTTTACAGCTATAAGTCCT | TAGACT | TTTTTT                  | 99.5% |
| 195 | TT                  | TTGACC | ACGAGTACGACGACCATTTTTTT | 99.4% |
| 97  | AAAAAAAGT           | TTGACC | TTGGCGTTCGTAAAA         | 99.3% |
| 54  | TTTTAATATGAATTAAGGG | CGGACT | TTTTTT                  | 98.9% |
| 239 | TTTTGCACGCATACGTGTA | ACGACT | TTTTTT                  | 97.7% |
| 43  | TTTTAACACCAGCAGCA   | ATGACC | TTTTTTTT                | 91.6% |

Alignment of positives of only WRKY50 DBD:

|     |                                |         |                  |       |
|-----|--------------------------------|---------|------------------|-------|
| 1   | TTTTTACGAC                     | TAGACT  | TTTTTT           | 88.6% |
| 120 | AAAAAATTCGCGTGTATGTGTACGTAAAA  |         |                  | 72.7% |
|     | TTTTACGTACACATACACGCGGAATTTTTT |         |                  |       |
| 174 | AAAAAATTTCTCCTTCTTTGTTCTTCAAAA |         |                  | 66.2% |
|     | TTTTGAAGAACAAGAAGGAGAAATTTTTT  |         |                  |       |
| 21  | TTTTAAACAAGAAGC                | ATGACT  | CCCTTTTTT        | 63.4% |
| 86  | TTTTAGTA                       | AAAGACA | AAAGTAAGAATTTTTT | 62.3% |
| 205 | TTTTGGAGCGAGAG                 | CGGACA  | GGAATTTTTT       | 58.7% |

Alignment of positives of only WRKY33 cDBD:

|     |                                |         |                    |       |
|-----|--------------------------------|---------|--------------------|-------|
| 108 | AAAAAAGGCCT                    | CTGACT  | GTAACCTCGTAAAA     | 99.8% |
| 276 | AAAAAACATCGCTCTCG              | TTGACG  | TTGAAAA            | 99.6% |
| 271 | AAAAAACGTTGAACCTGGGCCTCAACAAA  |         |                    | 99.6% |
|     | TTTTGTTGAGGCCAGGTTCAACGTTTTTT  |         |                    |       |
| 260 | AAAAAAGTATAACGTGTTG            | TTGACC  | GAAAA              | 99.4% |
| 91  | TTTTTTGAG                      | TTGACT  | AGCGGCCACTTTTTTT   | 99.4% |
| 92  | TTTTCCGCCCTGCAGCCG             | CAGACT  | TTTTTT             | 99.3% |
| 222 | TTTTCTCCCACAAC                 | ACGACC  | GCCTTTTTT          | 98.9% |
| 83  | AAAAAATATGTAGCTGCCGTTACGCTAAAA |         |                    | 98.0% |
|     | TTTTAGCGTAACGGCAGCTACATATTTTTT |         |                    |       |
| 36  | TTTTAAGCGAGGACG                | AAAGACC | AAATTTTTT          | 91.3% |
| 246 | AAAAA                          | CTGACC  | GTCAGCGCCCACGCAAAA | 88.2% |
| 160 | TTTTATCATTAACGATC              | GCGACC  | GTTTTTT            | 86.9% |
| 88  | AAAAAATCAACCATTATGGTATTACTAAAA |         |                    | 85.7% |
|     | TTTTAGTAATACCATAATGGTTGATTTTTT |         |                    |       |
| 117 | AAAAAATCAGC                    | CTGACT  | CTGGGCGTAAAA       | 84.9% |
| 57  | TTTTGGGAGACGAA                 | GAGACT  | AATTTTTTTT         | 84.6% |



**WRKY11 DBD vs. WRKY50 DBD** (Fig. 5A)Alignment of positives according to WRKY50 DBD rel. absorbance:

|     |                |           |                  |          |       |
|-----|----------------|-----------|------------------|----------|-------|
| 97  | AAAAAAAGT      | TTGACC    | TTGGCGTTCGTAAAA  | 100%     |       |
| 233 | TTTTCTGAT      | GACGTGGAC | TGGACC           | TTTTTT   | 98.0% |
| 101 | TTTTACAGCTATAA | GTCCT     | TAGACT           | TTTTTT   | 82.2% |
| 173 | AAAAAATACAT    | TTGACT    | TTGGGTTTCAAAA    | 81.9%    |       |
| 202 | AAAAAAGA       | TTGACT    | CGTCTTACTCGAAAAA | 79.7%    |       |
| 137 | TTTTGAATAATA   | TTGACC    | TAGAGTTTTTTTT    | 64.2%    |       |
| 195 | TT             | TTGACC    | ACGAGTACGACGACC  | CATTTTTT | 60.5% |

Alignment of positives according to WRKY11 DBD rel. absorbance:

|     |                |           |                  |          |       |
|-----|----------------|-----------|------------------|----------|-------|
| 97  | AAAAAAAGT      | TTGACC    | TTGGCGTTCGTAAAA  | 98.0%    |       |
| 173 | AAAAAATACAT    | TTGACT    | TTGGGTTTCAAAA    | 91.9%    |       |
| 137 | TTTTGAATAATA   | TTGACC    | TAGAGTTTTTTTT    | 76.7%    |       |
| 195 | TT             | TTGACC    | ACGAGTACGACGACC  | CATTTTTT | 76.7% |
| 202 | AAAAAAGA       | TTGACT    | CGTCTTACTCGAAAAA | 73.8%    |       |
| 101 | TTTTACAGCTATAA | GTCCT     | TAGACT           | TTTTTT   | 59.9% |
| 233 | TTTTCTGAT      | GACGTGGAC | TGGACC           | TTTTTT   | 44.4% |

Alignment of positives of only WRKY50 DBD:

|     |                                |        |                  |       |       |
|-----|--------------------------------|--------|------------------|-------|-------|
| 1   | TTTTTAC                        | GAC    | TAGACT           | TTTTT | 88.6% |
| 54  | TTTTAATATGAATTAAGGG            | CGGACT | TTTTT            | 78.5% |       |
| 120 | AAAAAATTCGCGTGTATGTGTACGTAAAA  |        |                  | 72.7% |       |
|     | TTTTACGTACACATACACGCGGAATTTTTT |        |                  |       |       |
| 174 | AAAAAATTTCTCCTTCTTTGTTCTTCAAAA |        |                  | 66.2% |       |
|     | TTTTGAAGAACAAGAAGGAGAAATTTTTT  |        |                  |       |       |
| 239 | TTTTGCACGCATACGTGTA            | ACGACT | TTTTT            | 65.8% |       |
| 21  | TTTTAAACAAGAAGC                | ATGACT | CCTTTTTTT        | 63.4% |       |
| 43  | TTTTAACACCAGCAGCA              | ATGACC | TTTTTTTT         | 63.4% |       |
| 86  | TTTTAGTA                       | AAGACA | AAAGTAAGAATTTTTT | 62.3% |       |
| 205 | TTTTGGAGCGAGAG                 | CGGACA | GGAATTTTTT       | 58.7% |       |

Alignment of positives of only WRKY11 DBD:

|     |                     |        |                        |         |       |
|-----|---------------------|--------|------------------------|---------|-------|
| 260 | AAAAAAGTATAACGTGTTG | TTGACC | GAAAA                  | 100%    |       |
| 91  | TTTTTGAG            | TTGACT | AGCGCCACTTTTTTTT       | 91.9%   |       |
| 276 | AAAAAACATCGCT       | GTCG   | TTGACG                 | TTGAAAA | 90.8% |
| 92  | TTTTCCGCCCTGCAGCCG  | CAGACT | TTTTTTT                | 47.6%   |       |
| 198 | TT                  | TTGACC | TAAATTGGATCAGATATTTTTT | 43.5%   |       |
| 287 | AAAAAACACGCCA       | TTGACA | CTGGTAAAAAA            | 43.5%   |       |

**Supplementary Table 8|** Alignment of WRKY DBDs to identify conserved proximity sites. The alignment was performed using CLUSTAL 2.1 multiple sequence alignment. Highlighted are the sites important for WRKY-DNA interaction from which the consensus in Figure 7 was derived.

|                    | <b><math>\beta_2</math></b> | <b><math>\beta_3</math></b> | <b><math>\beta_4</math></b> |                                     |
|--------------------|-----------------------------|-----------------------------|-----------------------------|-------------------------------------|
|                    | 123456                      | 78                          |                             |                                     |
| OsWRKY33           | WRKYGGKVVKGN-PNPSR          | -GTFPSRCSPIPPAFTA           | NGAGAAFQRTKDKPRD            | ----DLFVESLLC-----                  |
| OsWRKY58           | WRKYGSKAVKNS-DPSPD          | -DE---                      | LLFSDNDNTQTATENLRFIPLG      | ----RVYITG----                      |
| AtWRKY51_At5g64810 | WRKYGSKSVKNN-INKRL          | -RLYREG                     | ----NVKKA                   | CKKSLCDSSVTCKRQR----DLFEEEDFPY----- |
| OsWRKY56           | WRKYGSKSIKNN-PHPR           | -----                       | -----                       | -----CATRSIIDPI-----                |
| OsWRKY15           | WRKYGSKDILGA-KYP            | -----RAYFRCTHRHT            | -QGCHAKQVQRADG              | ---DPLL---FDVVYHGDHTCAHG-----       |
| OsWRKY19           | WRKYGSKDILGA-KYP            | -----RAYFRCTHRHT            | -QGCHAKQVQRADG              | ---DPLL---FDVVYHGDHTCGQA-----       |
| OsWRKY41-CTD       | WRKYGSKDILGA-KYP            | -----RSYFRCTHRNT            | -QGCVAIKQIQRRDG             | ---DPLL---FDVVYHGDHTCSER-----       |
| OsWRKY61-CTD       | WRKYGSKNIFGA-NYP            | -----RCYYRCIHKTT            | -TGCTAKNAQATDG              | ---DPLL---FDVVYHGEHTCDLQ-----       |
| OsWRKY81-CTD       | WRKYGSKNIFGA-NYP            | -----RCYYRCIHKTT            | -TGCTAKNAQATDG              | ---DPLL---FDVVYHGEHTCDLQ-----       |
| OsWRKY63-NTD       | WSKYEKKEILGA-KFP            | -----RAYFRCTHWNTKKGCM       | AKVQRDDG                    | ---DPLM---FDIVYHGEHTCQT-----        |
| OsWRKY69           | WRKYGSKDILGA-KHP            | -----RGYYRCTHRNT            | -QGCTAKQVQRTDD              | ---DASL---FDVVYHGEHTCRPG-----       |
| OsWRKY74           | WRKYGSKKEILGA-KHP           | -----RGYYRCTHRHS            | -QGCMAKQVQRTDE              | ---DAMV---FDVIYHGEHTCVHK-----       |
| OsWRKY63-CTD       | WRKYGSKNVLGF-SYL            | -----RGYYRC                 | ---AT-KGCQA                 | KQVQRHD---DGLL---FDVTFGEHTCADQ----- |
| OsWRKY41-NTD       | WRKYGSKDILGT-MYP            | -----RSYFRCTHRHT            | -KGCLAKQVQPTDD              | ---DHQI---LDVIYGEHTCDQS-----        |
| OsWRKY61-NTD       | WRKYGSKDVEGA-MHPTTQ         | -----SKSYFRCAHKMT           | -TGCKAKKQVQRTDG             | ---DPLM---VDVVYKGVHSCAGV-----       |
| OsWRKY81-NTD       | WRKYGSKDVEGA-MHPTTQ         | -----SN-YFRCAHKMT           | -TGCKAKKQVQRTDG             | ---DPLM---VDVVYKGVHSCAGV-----       |
| OsWRKY48           | WRKYGSKKEIKNS-KHP           | -----RLYYRCSYKDD            | -HGCTAKQVQOSE               | ---EDPS---LYVITYFGDHTCSCQ-----      |
| OsWRKY54           | WRKYGSKKEIKNS-KHP           | -----RFYYRCSYKDD            | -HGCTAKQVQOSE               | TADDDTASP---VYIITYFGEHTCRHG-----    |
| OsWRKY21           | WRKYGSKKEINGC-KHP           | -----RLYYRCAFRG             | -QGCLARRVQSQS               | -QDDPAA---AFVIAYGEHTCGGD-----       |
| OsWRKY47           | WRKYGSKHIQDSPNNP            | -----RSYYRCTHRPD            | -QGCMAKQVQTSSES             | ---NSSE---FVISYGEHTCRDP-----        |
| AtWRKY54_At2g40750 | WRKYGSKKEILNT-TFP           | -----RSYFRCTHKPT            | -QGCKAKQVQKQDQ              | ---DSEM---FQITYIGYHTCOTAN-----      |
| AtWRKY70_At3g56400 | WRKYGSKKEILNA-KFP           | -----RSYFRCTHKYT            | -QGCKAKQVQKVEL              | ---EPKM---FSITYIGNHTCNTN-----       |
| OsWRKY45           | WRKYGSKKEIQNS-KHP           | -----KAYFRCTHKYD            | -QMCTARQVQRCDD              | ---DPAS---YRVTYIGEHTCRDP-----       |
| OsWRKY75           | WRKYGSKDILGS-RYP            | -----RSYYRCTHKNY            | -YGCFAKKVQRLDD              | ---DPFT---YEVTYCGNHTCCLTS-----      |
| AtWRKY55_At2g40740 | WRKYGSKKEILGS-RFP           | -----RAYRCTHQKL             | -YNCPAKQVQRLND              | ---DPFT---FRVTYRGSHTCYNS-----       |
| SemWRKY2           | WRKYGSKDILNS-KFP            | -----RSYYRCTHQKE            | -LGCQAKYVQKCED              | ---EPSM---YQVTYIGEHSQNA-----        |
| SemWRKY25          | WRKYGSKDILNS-KFP            | -----RSYYRCTHQKE            | -LGCQAKYVQKCED              | ---EPSM---YQVTYIGEHSQNA-----        |
| SemWRKY16          | WRKYGSKDILGS-RHP            | -----KSYRCTHKRE             | -SGCPAKYVQRSDS              | ---NPSS---FQITYRGEHTCNML-----       |
| SemWRKY27          | WRKYGSKDILGS-RHP            | -----KSYRCTHKRE             | -SGCPAKYVQRSDS              | ---NPSS---FQITYRGEHTCNML-----       |
| AtWRKY41_At4g11070 | WRKYGSKDILGA-KFP            | -----RSYYRCTFRNT            | -QYCWAKQVQRSDD              | ---DPTI---FEVTYRGTHTCOGL-----       |
| AtWRKY53_At4g23810 | WRKYGSKDILGA-KFP            | -----RSYYRCTHRST            | -QNCWAKQVQRSDD              | ---DATV---FEVTYRGTHTCOQA-----       |
| AtWRKY30_At5g24110 | WRKYGSKDILGA-KFP            | -----RGYYRCTYRKS            | -QGCEAKQVQRSDE              | ---NQML---LEISYRGIHSCSQA-----       |
| AtWRKY46_At2g46400 | WRKYGSKKEIHGS-KNP           | -----RAYRCTHRFT             | -QDCLAKQVQKSDT              | ---DPSL---FEVKYLGNHHTONNI-----      |
| PpWRKY35           | WKKYGNKSIQNS-NHC            | -----RGYYKCSVKE             | ---CRAMKMVQPTDK             | ---DPMV---FEITYVGKHTCSST-----       |
| PpWRKY36           | WKKYGNKSIQNS-NHC            | -----RGYYKCSVKE             | ---CRAMKMVQPTDT             | ---DPTV---FEVTVYVEKHTCSST-----      |
| PpWRKY34           | WKKYGNKAIQNS-NHC            | -----RGYYKCSLKE             | ---CRAMKMVQLTDR             | ---DPTL---FEVTVYVGHKSGSS-----       |
| PpWRKY37           | WKKYGNKAIQNS-TFC            | -----RGYYKCSMKE             | ---CRAMKMVQPTDT             | ---NPSI---FEVTVYLGKHTCSST-----      |
| OsWRKY18           | WRKYGSKKIKNNS-SFPR          | -----LYYRCSYRDD             | -RNCMAKVVQQEND              | ---ADPPL---YRVTYIHPHTCNPS-----      |
| OsWRKY46           | WRKYGSKKLSNS-NFP            | -----RCTYKND                | -MKCPAKQVQKDT               | ---NDPPL---FSVTVYFNHHTCNSS-----     |
| OsWRKY22           | WRKYGSKMIRGN-SFPR           | -----CYRCTYHQD              | -HGCPAKHVEQHNS              | ---EDPPL---FRVIYTNHHTCGTS-----      |
| OsWRKY52           | WRKYGSKKIQGT-HFT            | -----SVNTQED                | -DGGVADS                    | -----                               |
| OsWRKY55           | WRKYGSKKINNC-NFP            | -----RTNDQCQ                | -LTFKSTA                    | -----                               |
| OsWRKY20           | WRKYGSKNIQDS-NYLR           | -----LYFKCTFSRE             | -RSCAAKQVQQRDA              | ---GEPPM---FLVTVYLNHHTCGQP-----     |
| OsWRKY50           | WRKYGSKQIEGA-MYP            | -----RSYYRCTNSTN            | -QGCLAKTVQRNGG              | ---GGAAG---YTVAYISEHTCKSI-----      |

|                                |                                         |                  |                      |                       |          |
|--------------------------------|-----------------------------------------|------------------|----------------------|-----------------------|----------|
| OsWRKY65                       | WRKYGKQIEGA-MYP-----RSYYRC              | TNSTN-QGCLA      | KTVQRNGG--GGAAG----  | YTVAYISEHTCKSI-----   | 70       |
| OstWRKY33_Ostreococcus_tauri_w | WRKYGKLIAGN-MVPHPT----                  | ERSYRCK--H-FGCPA | KRVEVEKV--TGAT-----  | RTVYEFEHTRDGD-----    | 69       |
| AtWRKY38_At5g22570             | WRKYGKSIKKS-NHQ-----RSYYRC              | SYNKD-HNCEA      | KHEQKIKD--NPPV----   | YRTTYFGHHTCKTE-----   | 69       |
| AtWRKY62_At5g01900             | WRKYGKQIKES-EYQ-----RSYKCA              | YTKD-QNCEA       | KQVQKIQH--NPPL----   | YSTTYVGOHIQOLH-----   | 69       |
| AtWRKY63_At1g66600             | WRKYGKTIKTS-LYQ-----RCYYRC              | AYAKD-QNCEA      | KRVQMIQD--SPPV----   | YRTTYLGOHTCKAF-----   | 69       |
| AtWRKY64_At1g66560             | WRKYGKTIKTS-PYQ-----RCYYRC              | TYAKD-QNCEA      | KRVQMIQD--NPPV----   | YRTTYLKGKHKAV-----    | 69       |
| AtWRKY67_At1g66550             | WRKYGKTIKAS-AHK-----RCYYRC              | TYAKD-QNCEA      | KRVQKIKD--NPPV----   | YRTTYLKGKHKAF-----    | 69       |
| AtWRKY66_At1g80590             | WRKYGKTIKTS-PHQ-----RWYYRC              | AYAKD-QNCEA      | KRVQKIQD--NPPV----   | YRNTYVGOHACAP-----    | 69       |
| OsWRKY37                       | WRKYGKPIKGS-PYP-----RGYYRC              | SS--SK-GCSA      | KQVERSRD--PNMLV----  | ITYTSEHN-HPWP-----    | 67       |
| OsWRKY66                       | WRKYGKPIKGS-PYP-----RGYYRC              | SS--SK-GCSA      | KQVERSRD--PNMLV----  | ITYTSEHN-HPWP-----    | 67       |
| AtWRKY35_At2g34830             | WRKYGKPIKGS-PYP-----RGYYRC              | SS--SK-GCSA      | KQVERSRD--PNMLV----  | ITYTSEHN-HPWP-----    | 67       |
| AtWRKY14_At1g30650             | WRKYGKPIKGS-PYP-----RGYYRC              | SS--SK-GCSA      | KQVERSRD--PNMLV----  | ITYTSEHN-HPWP-----    | 67       |
| OsWRKY2                        | WRKYGKPIKGS-PYP-----RGYYRC              | SS--SK-GCSA      | KQVERSRD--PTMLV----  | VTYTSDHN-HPWP-----    | 67       |
| Sem WRKY12                     | WRKYGKPIKGS-PYP-----RGYYRC              | SS--SK-GCSA      | KQVERSRD--PTMLI----  | ITYTSEHN-HPWPAHRNSLAG | 75       |
| SemWRKY34                      | WRKYGKPIKGS-PYP-----RGYYRC              | SS--SK-GCSA      | KQVERSRD--PTMLI----  | ITYTSEHN-HPWP-----    | 67       |
| OsWRKY13                       | WRKYGKPIKGS-PYP-----RGYYRC              | SS--SK-GCPA      | KQVERSRD--PTVLL----  | VTYSFEN-HPWP-----     | 67       |
| AtWRKY65_At1g29280             | WRKYGKPIKGS-PYP-----RGYYRC              | SS--TK-GCPA      | KQVERSRD--PTMLI----  | ITYTSEHN-HPWP-----    | 67       |
| OsWRKY14                       | WRKYGKPIKGS-PFP-----RAYYRC              | SS--SK-GCPA      | KQVERSRD--PDTVI----  | VTYSFEN-HSAT-----     | 67       |
| OsWRKY39                       | WRKYGKPIKGS-PYP-----RGYYRC              | SS--SK-GCPA      | KQVERSRD--PNTFI----  | LTYTGEHN-HSAP-----    | 67       |
| AtWRKY22_At4g01250             | WRKYGKPIKGS-PYP-----RGYYRC              | SS--SK-GCLA      | KQVERNRS--PKMFI----  | VTYTAEHN-HPAP-----    | 67       |
| AtWRKY27_At5g52830             | WRKYGKPIKGS-PYP-----RNYRCS              | SS--SK-GCLA      | KQVERSRD--PNIFI----  | VTYTGEHN-HPRP-----    | 67       |
| AtWRKY29_At4g23550             | WRKYGKPIKGS-PYP-----RSYYRC              | SS--SK-GCLA      | KQVERNPN--PEKFT----  | ITYTNEHN-HELP-----    | 67       |
| OsWRKY12                       | WRKYGKPIKGS-PYP-----RGYYRC              | SS--MK-GCMA      | KMVERSPA--PGMLV----  | VTYMAEHC-HPVP-----    | 67       |
| AtWRKY16_At5g45050             | WRKYGKPIKGS-PYP-----RSYYRC              | SS--SK-GCPA      | KQVERSRD--PNVSV----  | ITYISEHN-HPFP-----    | 67       |
| OsWRKY31                       | WRKYGKPIKGS-PYP-----RGYYRC              | SS--NK-NCAA      | KQVERCRF--PSFLL----  | LTYTGAHSGHDVP-----    | 68       |
| AtWRKY52_RRS1_At5g45270        | WRKYGKDILGS-RFP-----RGYYRC              | AYKFTG-GCKA      | KQVQRSET--SNMLA----  | ITYLSEHN-HPRP-----    | 69       |
| OsWRKY25                       | WRKYGKPIKGS-PYP-----RGYYRC              | SS--VK-GCPA      | KHVERAAD--PATLV----  | VTYEGDHR-HSPP-----    | 67       |
| OsWRKY44                       | WRKYGKPIKGS-PYP-----RGYYRC              | SS--VK-GCPA      | KHVERAAD--PATLV----  | VTYEGDHR-HSPP-----    | 67       |
| OsWRKY42                       | WRKYGKPIKGS-PYP-----RGYYRC              | SS--VK-GCPA      | KHVERDPE--PAMLI----  | VTYDGDHR-HGEP-----    | 67       |
| OsWRKY51                       | WRKYGKPIKGS-PFP-----RGYYRC              | SS--LR-GCPA      | KHVERPAD--PSMLI----  | VTYEGEHR-HTPS-----    | 67       |
| AtWRKY11_At4g31550             | WRKYGKPIKGS-PHP-----RGYYRC              | SS--FR-GCPA      | KHVERALD--PAMLI----  | VTYEGEHR-HNQS-----    | 67       |
| AtWRKY17_At2g24570             | WRKYGKPIKGS-PHP-----RGYYRC              | SS--FR-GCPA      | KHVERALD--STMLI----  | VTYEGEHR-HHQS-----    | 67       |
| OsWRKY68                       | WRKYGKPIKGS-PYP-----RGYYRC              | SS--VR-GCPA      | KHVERATD--PAMLV----  | VTYEGEHR-HTPG-----    | 67       |
| AtWRKY39_At3g04670             | WRKYGKPIKGS-PHP-----RGYYRC              | SS--VR-GCPA      | KHVERCID--TSMLI----  | VTYEGEHN-HSRI-----    | 67       |
| AtWRKY74_At5g28650             | WRKYGKPIKGS-PHP-----RGYYRC              | SS--VR-GCPA      | KHVERCEE--TSMLI----  | VTYEGEHN-HSRI-----    | 67       |
| SemWRKY8                       | WRKYGKPIKGS-PHP-----RGYYRC              | SS--LR-GCPA      | KHVERCLD--PTMLR----  | VTYEGEHS-HGVQ-----    | 67       |
| SemWRKY17                      | WRKYGKPIKGS-PHP-----RGYYRC              | SS--LR-GCPA      | KHVERCLD--PTMLR----  | VTYEGEHS-HGVQ-----    | 67       |
| SemWRKY10                      | WRKYGKPIKGS-PHP-----RGYYRC              | SS--LR-GCPA      | K-----               | -----                 | 42       |
| SemWRKY21                      | WRKYGKPIKGS-PHP-----RGYYRC              | SS--MR-GCPA      | K-----               | -----                 | 42       |
| SemWRKY31                      | WRKYGKPIKGS-PHP-----RGYYRC              | SS--MR-GCPA      | K-----               | -----                 | 42       |
| PpWRKY2                        | WRKYGKPIKGS-PHP-----RGYYRC              | SS--IR-GCPA      | KHVERSMED--PTMLI---- | VTYEGNHL-HRTQ-----    | 67       |
| SemWRKY9                       | WRKYGKPIKGS-PHP-----RGYYRC              | SS--MR-GCPA      | K-----               | -----                 | 42       |
| Sem WRKY18                     | WRKYGKPIKGS-PHP-----RGYYRC              | SS--MR-GCPA      | K-----               | -----                 | 42       |
| PpWRKY8                        | WRKYGKPIKGS-PHP-----RGYYRC              | SS--IR-GCPA      | KHVERSMED--PTMLI---- | VTYEGEHN-HPQS-----    | 67       |
| PpWRKY9                        | WRKYGKPIKGS-PHP-----RGYYRC              | SS--IR-GCPA      | KHVERSMED--PTMLI---- | VTYEGEHN-HPQL-----    | 67       |
| PpWRKY7                        | WRKYGKPIKGS-PHP-----RGYYRC              | SS--IR-GCPA      | KHVERSMED--STMLI---- | VTYEGEHN-HL-----      | 65       |
| PpWRKY1                        | WRKYGKPIKGS-PHP-----RGYYRC              | SS--IR-GCPA      | KHVERSMED--SSMLI---- | VTYEGDHN-HPQS-----    | 67       |
| AtWRKY21_At2g30590             | WRKYGKPIKGS-PYP-----RGYYRC              | SS--MR-GCPA      | KHVERCLD--PAMLI----  | VTYEAEHN-HPKL-----    | 67       |
| AtWRKY7_At4g24240              | WRKYGKPIKGS-PHP-----RGYYRC              | SS--VR-GCPA      | KHVERALD--AMMLI----  | VTYEGDHN-HALV-----    | 67       |
| AtWRKY15_At2g23320             | WRKYGKPIKGS-PHP-----RGYYRC              | SS--VR-GCPA      | KHVERAAD--SSMLI----  | VTYEGDHN-HSLS-----    | 67       |
| OsWRKY6                        | WRKYGKPIKGS-PHP-----RGYYRC              | SS--KK-DCPA      | KHVERCRS--PAMLL----  | VTYENEHN-HAQP-----    | 67       |
| PpWRKY25                       | WRKYGKPIKGS-PHP-----IKGS-PHP-----RGYYRC | SS--MR-GCLA      | KHVERLED--SSMLI----  | ITYEGEHN-HSRSTSVSALL  | 56       |
| Sem WRKY19                     | HOKASAGIKGS-PHP-----RGYYRC              | SS--LR-GCPA      | KHVERCLD--P-----     | TTDAGERS-HG-----      | VQPQ--61 |
| AtWRKY6_At1g62300              | WRKYGKMAKGN-PCP-----RAYYRC              | SS--TGCPV        | KQVQCAED--RSILI----  | TTYEGNHN-HPPL-----    | 67       |

|                                |                                                                                      |
|--------------------------------|--------------------------------------------------------------------------------------|
| AtWRKY31_At4g22070             | WRKYGQKMAKGN-PCP-----RAYYRCTMA---GGCPVKQVQRC AED--RSILI-----TTYEGNHN--HPLP-----67    |
| AtWRKY42_At4g04450             | WRKYGQKMAKGN-PCP-----RAYYRCTMA---VGCPVKQVQRC AED--RTILI-----TTYEGNHN--HPLP-----67    |
| OsWRKY43                       | WRKYGQKMAKGN-PCP-----RAYYRCTMA---AGCPVKQVQRC AED--RTVLI-----TTYEGNHN--HPLP-----67    |
| OsWRKY1                        | WRKYGQKMAKGN-PCP-----RAYYRCTMA---TGCPVKQVQRC AED--RSILI-----TTYEGTHN--HPLP-----67    |
| OsWRKY5                        | WRKYGQKMAKGN-PCP-----RAYYRCTMA---SQCPVKQVQRC AKD--KSILI-----TTYEGTHS--HPLP-----67    |
| OsWRKY32                       | WRKYGQKVAKGN-PCP-----RAYYRCTVA---PGCPVKQVQRC LED--MSILV-----TTYEGTHN--HPLP-----67    |
| AtWRKY9_At1g68150              | WRKYGQKTAKGN-PCP-----RAYYRCTVA---PGCPVKQVQRC LED--MSILI-----TTYEGTHN--HPLP-----67    |
| OsWRKY73                       | WRKYGQKIAKGN-PCP-----RAYYRCTVA---AGCPVKQVQRC AED--MSILI-----TTYEGTHN--HPLP-----66    |
| AtWRKY72_At5g15130             | WRKYGQKIAKGN-PCP-----RAYYRCTVA---PGCPVKQVQRC AED--MSILI-----TTYEGTHS--HSLP-----67    |
| PpWRKY19                       | WRKYGQKMAKGN-PCP-----RAYYRCTVA---PGCPVKQVQRC AED--VSILI-----TTYEGTHN--HPLP-----61    |
| SemWRKY7                       | WRKYGQKMAKGN-PCP-----RAYYRCTVA---PGCPVKQVQRC AED--MSILI-----TTYEGSHN--HPLP-----62    |
| SemWRKY26                      | WRKYGQKMAKGN-PCP-----RAYYRCTVA---PGCPVKQVQRC AED--MSILI-----TTYEGSHN--HPLP-----62    |
| PpWRKY13                       | WRKYGQKMAKGN-PCP-----RAYYRCTVA---PGCPVKQVQRC AED--ISILV-----TTYEGTHN--HPLP-----54    |
| SemWRKY23                      | WRKYGQKMAKGN-PCP-----RAYYRCTMS---PGCPVKQVQRC AED--TSILV-----TTYEGTHN--HPLP-----62    |
| SemWRKY33                      | WRKYGQKMAKGN-PCP-----RAYYRCTMS---PGCPVKQVQRC AED--TSILV-----TTYEGTHN--HPLP-----62    |
| AtWRKY47_At4g01720             | WRKYGQKMAKGN-PCP-----RAYYRCTMA---VGCPVKQVQRC AED--TTILT-----TTYEGNHN--HPLP-----67    |
| PpWRKY10                       | WRKYGQKMAKGN-PCP-----RAYYRCTVM---SGCPVKQVQRC AKD--TSILV-----STYEGTHN--HPLP-----61    |
| SemWRKY3                       | WRKYGQKMAKGN-PCP-----RAYYRCTMA---SGCPVKQVQRC AED--TSVLV-----TTYEGSHN--HQLP-----56    |
| SemWRKY28                      | WRKYGQKMAKGN-PCP-----RAYYRCTMA---SGCPVKQVQRC AED--TSVLV-----TTYEGSHN--HQLP-----56    |
| OsWRKY9                        | WRKYGQKMAKGN-PCP-----RAYYRCTMA---IGCPVKQVQRC AED--KTVLI-----TTYEGNHN--HQLP-----67    |
| AtWRKY61_At1g18860             | WRKYGQKIAKGN-PCP-----RAYYRCTIA---ASCPVKQVQRC SED--MSILI-----STYEGTHN--HPLP-----67    |
| PpWRKY33                       | WRKYGQKMAKGN-PCP-----RAYYRCTLL---RGCPVKQVQRC AED--LSILI-----TTYEGTHN--HPIPA-----61   |
| OsWRKY27                       | WRKYGQKTAKGN-PWP-----RGYRCTGA---PGCPVKQVQRC NHD--TSVLV-----TTYDGVHN--HPIT-----67     |
| PpWRKY5                        | WRKYGQKMAKGN-PWP-----RAYFRCTVS---PGCPVKQVQRC EED--TSILV-----TTYEGTHN--HALS-----60    |
| AtWRKY36_At1g69810             | WRKYGQKTAKTN-PLP-----RAYYRCSMS---SNCPVKQVQRC GEEE--TSAFM-----TTYEGNHD--HPLP-----68   |
| OsWRKY28                       | WRKYGQKVTKDN-PCP-----RAYFRCSFA---PACPVKKQVQRC SADD--NTVLV-----ATYEGEHN--HAQP-----67  |
| OsWRKY71                       | WRKYGQKVTKDN-PCP-----RAYFRCSFA---PACPVKKQVQRC SADD--NTILV-----ATYEGEHN--HGQP-----67  |
| OsWRKY76                       | WRKYGQKVTRDN-PSP-----RAYFRCAFA---PSCPVKKQVQRC SADD--SLLLV-----ATYEGEHN--HPHP-----67  |
| AtWRKY40_At1g80840             | WRKYGQKVTRDN-PSP-----RAYFKACA---PSCPVKKQVQRC SADD--QSVLV-----ATYEGEHN--HPMP-----67   |
| AtWRKY18_At4g31800             | WRKYGQKVTRDN-PSP-----RAYFRCSFA---PSCPVKKQVQRC SADD--PSLLV-----ATYEGTHN--HLGP-----67  |
| AtWRKY60_At2g25000             | WRKYGQKITRDN-PSP-----RAYFRCSFA---PSCLVKKQVQRC SADD--PSFLV-----ATYEGTHN--HTGP-----67  |
| OsWRKY62                       | WRKYGQKVTRDN-PYP-----RAYFRCAFA---PSCPVKKQVQRC AED--RSMVLV-----ATYEGEHN--HALS-----67  |
| OsWRKY82-CTD                   | WRKYGQKIVKGN-PNP-----RSYRCTHD---GCPVKKHVEKAPDD--DNNIV-----VTYEGKHN--HDQP-----66      |
| AtWRKY32-CTD_At4g30930_CTD     | WRKYGQKMKVGN-PHP-----RNYRCTSA---GCPVKKHVETAVEN--TKAVI-----ITYKGVHN--HDMP-----66      |
| XP_003061495_MiPu              | WRKYGQKIIKGA-PFP-----RSYRCTSA---NCPVKKHVEGDPSSL--LSS-----LTYEGEHN--HEKP-----62       |
| XP_002509266_MiPu              | WRKYGQKIIKGA-AFP-----RSYRCTAP---NCPVKKHVEGDPK--PGS-----IAYEGTHN--HEPP-----64         |
| AtWRKY44-CTD_TTG2_At2g37260_CT | WRKYGQKVVGGN-AYP-----RSYRCTSA---NCPVKKHVERASDD--PRAFI-----TTYEGKHN--HLLL-----67      |
| AtWRKY1-CTD_ZAP1_At2g04880_CTD | WRKYGQKSVKGS-PYP-----RSYRCSSP---GCPVKKHVERSSHD--TKLLI-----TTYEGKHD--HDMP-----66      |
| Ddiscoideum_WRKY-NTD_XM_638694 | WRKYGQKNVKGSLHP-----RHYYKCTFQ---GCPVKQVQRC AED--IGD--TNQNS-----TVYKGEHC--HGFP-----65 |
| PpWRKY30                       | WRKYGQKTVLSS-PYP-----RSYKCTTA---GCPVKQVQRC AED--RGLVI-----ASYEGEHN--HPLP-----63      |
| CocSub_CTD                     | WRKYGQKIVKGN-PHP-----RSYKCTVA---GCTVKKHVGRSATE--AGVLV-----TSYEGQHN--HPQP-----66      |
| ChvWRKY1-CTD_Chlorella_variabi | WRKYGQKIVKGN-PHP-----RSYKCTHP---GCPVKQVQRC AED--ARMLV-----TTYEGHTH--HDPP-----66      |
| Chr WRKY_EST_BQ821537          | WRKYGQKQVKGSLPP-----RAYKCTHM---GCPVKKHVERASDD--ETRFV-----VTYEGTHS--HRLP-----66       |
| OsWRKY3                        | WRKYGQKAVKNS-PFP-----RSYRCTNS---KCTVKKVERSSDD--PSVVI-----TTYEGQHC--HHTAS-----67      |
| OsWRKY29                       | WRKYGQKAVKNS-PFP-----RSYRCTNS---KCTVKKVERSSDD--PSVVI-----TTYEGQHS--HHTV-----66       |
| AtWRKY57_At1g69310             | WRKYGQKAVKNS-PFP-----RSYRCTNS---RCTVKKVERSSDD--PSIVI-----TTYEGQHC--HQTI-----66       |
| AtWRKY48_At5g49520             | WRKYGQKAVKNS-PYP-----RSYRCTTV---GCPVKKVERSSDD--PSIVM-----TTYEGQHT--HPPF-----66       |
| OsWRKY8                        | WRKYGQKAVKNS-SYP-----RSYRCTAP---RCGVKRVKVERSEQD--PSMVI-----TTYEGQHT--HPSP-----66     |
| OsWRKY11                       | WRKYGQKAVKNS-PYP-----RSYRCTTP---KCPVKKVERSEQD--PSTVI-----TTYEGQHT--HHSP-----66       |
| AtWRKY23_At2g47260             | WRKYGQKAVKNS-PFP-----RSYRCTTA---SCNVKRVKVERSPRD--PSTVV-----TTYEGQHT--HISP-----66     |
| OsWRKY16                       | WRKYGQKAVKNS-PYP-----RSYRCTTQ---KCPVKKVERSEQD--PAVVI-----TTYEGKHT--HPIP-----66       |
| OsWRKY49                       | WRKYGQKAVKNS-PFP-----RSYRCTTQ---KCPVKKVERSEQD--AAVVI-----TTYEGKHT--HPIP-----66       |
| AtWRKY8_At5g46350              | WRKYGQKAVKNS-PYP-----RSYRCTTQ---KCPVKKVERSEQD--PTVVI-----TTYEGQHN--HPIP-----66       |
| AtWRKY28_At4g18170             | WRKYGQKAVKNS-PYPRIIANGNENRSYRCTTQ---KCPVKKVERSEQD--PTVVI-----TTYEGQHN--HPIP-----72   |

|                                |                                                                                  |
|--------------------------------|----------------------------------------------------------------------------------|
| AtWRKY71_At1g29860             | WRKYGKAVKNS-PYP-----RSYRCTTQ---KCNVKKRVERSFQD--PSIVI----TTYEGKHN--HPIP-----66    |
| AtWRKY68_At3g62340             | WRKYGKQPVKDS-PFP-----RNYRCTTT---WCDVKKRVERSFSD--PSSVI----TTYEQOHT--HPRP-----66   |
| SemWRKY1                       | WRKYGKAVKNS-PHP-----RSYRCTNS---KCPVKKRVERSCED--PGIVI----TTYEGTHT--H-----63       |
| SemWRKY14                      | WRKYGKAVKNS-PHP-----RSYRCTNS---KCPVKKRVERSCED--PGIVI----TTYEGTHT--H-----63       |
| SemWRKY30                      | WRKYGKAVKNS-PHP-----RSYRCTNS---KCPVKKRVERSCED--PGIVI----TTYEGTHT--H-----63       |
| SemWRKY11                      | WRKYGKAVKNS-PHP-----RSYRCTNT---KCPVKKRVERSSSED--QGLVI----TTYEGIHN--H-----63      |
| SemWRKY29                      | WRKYGKAVKNS-PHP-----RSYRCTNT---KCPVKKRVERSSSED--QGLVI----TTYEGIHN--H-----63      |
| SemWRKY24                      | WRKYGKAVKNS-PYP-----RSYRCTYT---KCHVKKRVERSSKD--SSLVI----TTYEGVHT--H-----63       |
| SemWRKY32                      | WRKYGKAVKNS-PYP-----RSYRCTYT---KCHVKKRVERSSKD--SSLVI----TTYEGVHT--H-----63       |
| PpWRKY3                        | WRKYGKAVKDS-PFP-----RSYRCTNQ---TCPVKKRVERKAGD--AGLVV----TTYEGTHS--HLSP-----66    |
| PpWRKY17                       | WRKYGKAVKNS-PYP-----RSYRCTNP---DCPVKKRVERKADD--HGLVV----TTYEGTHN--H-----63       |
| PpWRKY20                       | WRKYGKAVKNS-THP-----RSYRCTSH---TCPVKKRIERKADD--PGLVI----TTYEGTHN--H-----63       |
| PpWRKY14M                      | WRKYGKAVKNS-PHP-----RYYRCTNP---KCPVKKVERSAED--SELVI----TSYEGTHT--H-----63        |
| PpWRKY28                       | WRKYGKAVKNS-PHP-----RSYRCTNP---KCPVKKVERSAED--SELVI----TSYEGTHT--H-----63        |
| PpWRKY22                       | WRKYGKAVKNS-PHP-----RSYRCTHM---MCPVKKRVERSAED--TGLVI----TTYEGTHT--H-----63       |
| PpWRKY6                        | WRKYGKQPVKSS-PHP-----RNYRCTTA---NCPVKKRVERSIED--PGLIV----TSYEGTHT--HPKI-----66   |
| PpWRKY12                       | WRKYGKQPVKNS-PHP-----RNYRCTTA---HCPVKKRVERSTED--PGLVI----TSYEGTHS--H-----63      |
| PpWRKY15                       | WRKYGKQPVKNS-VHP-----RNYKCTTA---NCPVKKRVERCTDD--PSHVL----TTYDGTHT--H-----63      |
| PpWRKY11                       | WRKYGKQPVKSS-PHP-----RNYRCTTP---NCPVKKRVERSTED--PDQVI----TTYEGRHT--HQSP-----66   |
| PpWRKY18                       | WRKYGKAVKNS-PHP-----RNYRCTTP---QCPVKKRVERSSSED--AGLVI----TTYEGTHT--H-----63      |
| PpWRKY24                       | WRKYGKAVKNS-PYP-----RNYRCTTP---QCPVKKRVERSCED--SGLVI----TTYEGTHT--H-----63       |
| PpWRKY29                       | WRKYGKAVKNS-PHP-----RNYRCTTP---LCPVKKRVERSNED--AGLVI----TTYEGTHS--H-----63       |
| PpWRKY31                       | WRKYGKAVKNS-PHP-----RNYRCTTP---LCPVKKRVERSKED--AGLVI----TTYEGTHS--H-----63       |
| PpWRKY21                       | WRKYGKAVKNS-PHP-----RNYRCATP---NCPVKKRVERCIED--PGLVA----TAYEGTHS--HQFP-----66    |
| PpWRKY27                       | WRKYGKAVKNS-PHP-----RNYRCTTL---NCPVKKRVERCFDD--PGVMV----TTYEGTHT--H-----63       |
| OsWRKY36                       | WRKYGKQVVKNS-LHP-----RSYRCTHN---NCRVKKRVERLSED--CRMVI----TTYEGRHT--HTPC-----66   |
| AtWRKY12                       | WRKYGKQVVKNS-LHP-----RSYRCTHN---NCRVKKRVERLSED--CRMVI----TTYEGRHN--HIPS-----66   |
| OsWRKY34                       | WRKYGKQVVKNS-LHP-----RSYFRCTHS---NCRVKKRVERLSTED--CRMVI----TTYEGRHT--HSPC-----66 |
| OsWRKY79                       | WRKYGKQVVKNT-QHP-----RSYRCTQD---NCRVKKRVERLAED--PRMVI----TTYEGRHV--HSPS-----66   |
| AtWRKY13_At4g39410             | WRKYGKQVVKNT-QHP-----RSYRCTQD---KCRVKKRVERLADD--PRMVI----TTYEGRHL--HSPS-----66   |
| OsWRKY26                       | WRKYGKQSVKNS-PNP-----RNYRCSTE---GONVKKRVERDKND--PRYVV---TMYEGIHN--HVCP-----66    |
| OsWRKY59                       | WRKYGKQSVKNS-PNP-----RNYRCSTE---GONVKKRVERDKND--PRYVV---TTYEGIHN--HVCP-----66    |
| OsWRKY7                        | WRKYGKQSVKNS-PNP-----RNYRCSTE---GONVKKRVERDKDD--PSYVV---TTYEGTHN--HVSPS-----67   |
| NtWRKY11                       | WRKYGKQMVKDS-PNP-----RNYRCSIE---SCPVKKRVERDKED--CRYVI----TTYEGVHN--HQGP-----66   |
| NtWRKY10                       | WRKYGKQMVKDS-PNP-----RNYRCSVE---GCPVKKRVERDKED--CRYVI----TTYEGVHN--HQGP-----66   |
| OsWRKY67                       | WRKYGKAVKNS-PNP-----RNYRCSSTE---GONVKKRVERDRD--HRYVI----TTYDGVHN--HASP-----66    |
| ZmWRKY67_Zea_mays              | WRKYGKAVKNS-PNP-----RNYRCSSE---GCGVKKRVERDRDD--PRYVI----TTYDGVHN--HASP-----66    |
| PheWRKY10_Phyllostachys_edulis | WRKYGKAVKNS-PNP-----RNYRCSSTE---GCGVKKRVERDRDD--PCYVI----TTYDGVHN--HATP-----66   |
| OsWRKY10                       | WRKYGKAVKNS-PNP-----RNYRCSAA---GCGVKKRVERDRDD--PRYVV---TTYDGVHN--HATP-----66     |
| OsWRKY77                       | WRKYGKQMVKNS-PNP-----RNYRCSSE---GCRVKKRVERARD--ARFVV---TTYDGVHN--HPAP-----66     |
| AtWRKY50_At5g26170             | WRKYGKQMVKNS-PHP-----RNYKCSVD---GCPVKKRVERDRDD--PSFVI----TTYEGSHN--HSSM-----66   |
| OsWRKY23                       | WRKYGKAVKNS-KHP-----RSYRCTHH---TCNVKKQVQRLAKD--TSIVV----TTYEGVHN--HPCEKL-----68  |
| AtWRKY43_At2g46130             | WRKYGKQSVKNS-LYP-----RSYRCTQH---MCNVKKQVQRLSKE--TSIVE----TTYEGIHN--HPCE-----66   |
| AtWRKY24_At5g41570             | WRKYGKQSVKHN-AHP-----RSYRCTYH---TCNVKKQVQRLAKD--PNVVV---TTYEGVHN--HPCE-----66    |
| AtWRKY56_At1g64000             | WRKYGKQSVKNN-AHP-----RSYRCTYH---TCNVKKQVQRLAKD--PNVVV---TTYEGVHN--HPCE-----66    |
| OsWRKY72                       | WRKYGKAVKNN-KFP-----RSYRCTHQ---GONVKKQVQRLSRD--ETVVV---TTYEGTHT--HPIE-----66     |
| AtWRKY75_At5g13080             | WRKYGKAVKNN-KFP-----RSYRCTYQ---GONVKKQVQRLTVD--QEVVV---TTYEGVHS--HPIE-----66     |
| AtWRKY45_At3g01970             | WRKYGKAVKNN-PFP-----RSYKCTEE---GCRVKKQVQVQWGD--EGVVV---TTYQGVHT--HAVD-----66     |
| PpWRKY26                       | WRKYGKQPVKNS-HHP-----RNYKCTTP---NCLVKKQVERCTEN--PSNVM---TTYYGTHN--H-----63       |
| OsWRKY24-CTD                   | WRKYGKQVVKGN-PNP-----RSYKCTTA---GCPVKKHVERASHD--LRAVI---TTYEGKHN--HDVP-----66    |
| OsWRKY70-CTD                   | WRKYGKQVVKGN-PNP-----RSYKCTTA---GCPVKKHVERASHD--LRAVI---TTYEGKHN--HDVP-----66    |
| PcWRKY1-CTD                    | WRKYGKQVVKGN-PNP-----RSYKCTQV---GCPVKKHVERASHD--LRAVI---TTYEGKHN--HDVP-----66    |
| PbZFP1-CTD                     | WRKYGKQVVKGN-PNP-----RSYKCTQV---GCPVKKHVERASHD--LRAVI---TTYEGKHN--HDVP-----66    |
| AfABF1-CTD                     | WRKYGKQVVKGN-PNP-----RSYKCTTV---GCPVKKHVERASHD--LRAVI---TTYEGKHN--HDVP-----66    |



|                                |                                                                                 |    |
|--------------------------------|---------------------------------------------------------------------------------|----|
| OsWRKY53-CTD                   | WRKYGQKVVKGN-PNP-----RSYKCTTV---GCPVKHVERASHD--TRAVI-----TTYEGKHN--HDVP-----    | 66 |
| AtWRKY33-CTD_At2g38470_CTD     | WRKYGQKVVKGN-PNP-----RSYKCTTI---GCPVKHVERASHD--MRAVI-----TTYEGKHN--HDVP-----    | 66 |
| IbSPF1_CTD                     | WRKYGQKVVKGN-PNP-----RSYKCTSQ---GCPVKHVERASHD--IRSVI-----TTYEGKHN--HDVP-----    | 66 |
| OsWRKY30                       | WRKYGQKVVKGN-PNP-----RSYKCTHP---GCSVKHVERASHD--LKSVI-----TTYEGKHN--HEVP-----    | 66 |
| OsWRKY80                       | WRKYGQKVVKGN-PNP-----RSYKCTHQ---GCSVKHVERASHD--LKSVI-----TTYEGKHN--HEVP-----    | 66 |
| AtWRKY2-CTD_At5g56270_CTD      | WRKYGQKVVKGN-PNP-----RSYKCTAP---GCTVKHVERASHD--LKSVI-----TTYEGKHN--HDVP-----    | 66 |
| OsWRKY78-CTD                   | WRKYGQKVVKGN-PNP-----RSYKCTNT---GCPVKHVERASHD--PKSVI-----TTYEGKHN--HEVP-----    | 66 |
| AtWRKY20-CTD_At4g26640_CTD     | WRKYGQKVVKGN-PNP-----RSYKCTAH---GCPVKHVERASHD--PKAVI-----TTYEGKHD--HDVP-----    | 66 |
| PpWRKY16-CTD                   | WRKYGQKVVKGN-PHP-----RSYKCTNV---GCPVKHVERASTD--IKAVI-----TTYEGKHN--HDVP-----    | 66 |
| PpWRKY23-CTD                   | WRKYGQKVVKGN-PHP-----RSYKCTNV---GCPVKHVERASTD--IKAVI-----TTYEGKHN--HDVP-----    | 66 |
| PpWRKY4                        | WRKYGQKVVKGN-PHP-----RSYKCTNV---GCPVKHVERASND--PKAVI-----TTYEGKHN--HDVP-----    | 66 |
| SemWRKY6-CTD                   | WRKYGQKVVKGN-PHP-----RSYKCTNL---GCPVKHVERACDD--PRAVI-----TTYEGKHN--HDVP-----    | 66 |
| SemWRKY20-CTD                  | WRKYGQKVVKGN-PHP-----RSYKCTNL---GCPVKHVERACDD--PRAVI-----TTYEGKHN--HDVP-----    | 66 |
| SemWRKY5-CTD                   | WRKYGQKIVKGN-PYP-----RSYKCTNV---GCPVKHVERASND--PKSVI-----TTYEGKHN--HDVP-----    | 66 |
| Sem WRKY13-CTD                 | WRKYGQKIVKGN-PYP-----RSYKCTNV---GCPVKHVERASND--PKSVI-----TTYEGKHN--HDVP-----    | 66 |
| SemWRKY15                      | WRKYGQKVVKGN-PHP-----RYKCSSS---GCAVKHVERASND--PKSVI-----TTYEGKHN--HDVP-----     | 66 |
| SemWRKY22-CTD                  | WRKYGQKVVKGN-PHP-----RYKCSSS---GCAVKHVERASND--PKSVI-----TTYEGKHN--HDVP-----     | 66 |
| AtWRKY3-CTD_At2g03340_CTD      | WRKYGQKVVKGN-PYP-----RSYKCTTP---DCGVKHVERAATD--PKAVV-----TTYEGKHN--HDVP-----    | 66 |
| AtWRKY4-CTD_At1g13960_CTD      | WRKYGQKVVKGN-PYP-----RSYKCTTP---GCGVKHVERAATD--PKAVV-----TTYEGKHN--HDLP-----    | 66 |
| AtWRKY58-CTD_At3g01080_CTD     | WRKYGQKVVKGN-PHP-----RSYKCTTP---NCTVKHVERASTD--AKAVI-----TTYEGKHN--HDVP-----    | 66 |
| CsSPF1_CTD                     | WRKYGQKVVKGN-PNP-----RSYKCTSA---GCVVKHVERASDD--SKAVV-----TTYEGKHN--HDVP-----    | 66 |
| SemWRKY4-CTD                   | WRKYGQKVVKGN-PNP-----RSYKCTNP---GCPVKHVERAADD--PKAVI-----TSYEGKHD--HDTF-----    | 66 |
| AtWRKY26-CTD_At5g07100_CTD     | WRKYGQKVVKGN-PNP-----RSYKCTFT---GCFVKHVERAFQD--PKSVI-----TTYEGKHK--HQIP-----    | 66 |
| AtWRKY34-CTD_At4g26440_CTD     | WRKYGQKVVKGN-PNP-----RSYKCTAN---GCTVKHVERASDD--FKSVL-----TTYIGKHT--HVVP-----    | 66 |
| OsWRKY4-CTD                    | WRKYGQKVVKGN-PRP-----RSYKCTAD---GCVVKQIRASAD--PKCVL-----TTYTGRHN--HDPP-----     | 66 |
| AtWRKY25-CTD_At2g30250_CTD     | WRKYGQKVVKGN-TNP-----RSYKCTFQ---GCGVKQVERAADD--BRAVL-----TTYEGRHN--HDIP-----    | 66 |
| AtWRKY10_At1g55600             | WRKYGQKVVKGN-PNP-----SYFKCTNI---ECRVKHVERGADN--IKLVV-----TTYDGIHN--HPSP-----    | 66 |
| CrWRKY10_homolog               | WRKYGQKVVKGN-PNP-----SYFKCTNN---DCNVKHVERGADN--FKILV-----TSYDGIHN--HPPP-----    | 66 |
| Ddiscoidium WRKY-CTD_XM_638694 | WRKYGQKSVKGS-PFP-----KSYFKCAEL---TCPVKQVIQ--QD--SK-YI-----NTYRGKHN--HDPP-----   | 63 |
| OsWRKY24-NTD                   | WRKYGQKQVKGS-ENP-----RSYKCTFP---NCPVKKVERSL-D--GQITE-----IVYKGTNH--HAKP-----    | 65 |
| AfABF1_NTD                     | WRKYGQKQVKGS-ENP-----RSYKCTFP---NCPVKKVERSL-E--GQITE-----IVYKGTNH--HAKP-----    | 65 |
| OsWRKY70-NTD                   | WRKYGQKQVKGS-ENP-----RSYKCTFP---GCPVKKVEQSP-D--GQVTE-----IVYKGAHS--HPKP-----    | 65 |
| AtWRKY33-NTD_At2g38470_NTD     | WRKYGQKQVKGS-ENP-----RSYKCTFP---NCPVKKVERSL-E--GQITE-----IVYKGSNH--HPKP-----    | 65 |
| IbSPF1_NTD                     | WRKYGQKQVKGS-ENP-----RSYKCTHP---NCPVKKVERAL-D--GQITE-----IVYKGAHN--HPKP-----    | 65 |
| AtWRKY26-NTD_At5g07100_NTD     | WRKYGQKQVKGS-ENP-----RSYFKCTYP---NCLVKKVERSLVK--GQIE-----IVYKGSNH--HPKPQSTKRS-- | 72 |
| PcWRKY1_NTD                    | WRKYGQKQVKGS-ENP-----RSYKCTYL---NCPVKKVVETTF-D--GHITE-----IVYKGNHN--HPKP-----   | 65 |
| PbZFP1_NTD                     | WRKYGQKQVKGS-ENP-----RSYKCTYL---NCPVKKVVETTF-D--GHITE-----IVYKGNHN--HPKP-----   | 65 |
| AtWRKY25-NTD_At2g30250_NTD     | WRKYGQKQVKGS-ENP-----RSYFKCTYP---DCVSKIVETAS-D--GQITE-----IIVYKGSNH--HPKP-----  | 65 |
| PpWRKY16-NTD                   | WRKYGQKQVKGS-EYP-----RSYKCTQA---NCPMKKVERSH-D--GQVTE-----IVYKGDHN--HPKP-----    | 63 |
| PpWRKY23-NTD                   | WRKYGQKQVKGS-EYP-----RSYKCTQT---NCPMKKVERSH-D--GQVTE-----IVYKGDHN--HPKP-----    | 63 |
| SemWRKY6-NTD                   | WRKYGQKLVKGS-ENP-----RSYKCTYV---NCPMKKVERSP-D--GQVTE-----IVYEGEHN--HPKP-----    | 65 |
| SemWRKY20-NTD                  | WRKYGQKLVKGS-ENP-----RSYKCTYV---NCPMKKVERSP-D--GQVTE-----IVYEGEHN--HPKP-----    | 65 |
| SemWRKY5-NTD                   | WRKYGQKQVKGS-EFP-----RSYKCTSS---GCPVKKVERSQ-D--GQVTE-----IVYKGEHN--HPRP-----    | 65 |
| SemWRKY13-NTD                  | WRKYGQKQVKGS-EFP-----RSYKCTSS---GCPVKKVERSQ-D--GQVTE-----IVYKGEHN--HPRP-----    | 62 |
| SemWRKY22-NTD                  | WRKYGQKQVKGS-EFP-----RSYKCTHP---SCPVKKVERSY-D--GQVTE-----IVYKGEHC--HAKP-----    | 63 |
| AtWRKY44-NTD_TTG2_At2g37260_NT | WRKYGQKQVKGS-ECP-----RSYKCTHP---KCPVKKVERSV-E--GQVSE-----IVYQGEHN--HSKP-----    | 65 |
| OsWRKY57                       | WRKYGQKQVKGS-EFP-----RSYKCTHP---TCPVKKVEFTP-D--GRIAE-----IVYNGEHN--HPKP-----    | 65 |
| AtWRKY2-NTD_At5g56270_NTD      | WRKYGQKLVKGS-EYP-----RSYKCTNP---NCPVKKVERSR-E--GHITE-----IIVYKGAHN--HLKP-----   | 65 |
| AtWRKY34-NTD_At4g26440_NTD     | WRKYGQKLVKGS-EYP-----RSYKCTHP---NCEVKKVERSR-E--GHIE-----IIVYGDHI--HSKP-----     | 65 |
| OsWRKY35-NTD                   | WRKYGQKQVKGS-EYP-----RSYKCTHA---SCAVKKVERSH-E--GHVTE-----IIVYKGTNH--HPKP-----   | 65 |
| OsWRKY78-NTD                   | WRKYGQKHVKGS-ENP-----RSYKCTHP---NCDVKLLERSL-D--GQITE-----VVYKGRHN--HPKP-----    | 65 |
| AtWRKY20-NTD_At4g26640_NTD     | WRKYGQKHVKGS-EFP-----RSYKCTHP---NCEVKLFERSH-D--GQITD-----IIVYKGTND--HPKP-----   | 65 |
| OsWRKY53-NTD                   | WRKYGQKQVKGS-ENP-----RSYKCTYN---GCSMKKVERSLAD--GRITQ-----IVYKGAHN--HPKP-----    | 66 |
| SemWRKY4-NTD                   | WRKYGQKQVKGC-DNP-----RSYKCTHP---DCSAKLVERSVS--GETTQ-----IVYKGDHS--HSKP-----     | 58 |

|                                |                                                                                |
|--------------------------------|--------------------------------------------------------------------------------|
| AtWRKY3-NTD_At2g03340_NTD      | WRKYGKQVKGS-DFP-----RSYKCTHP---ACPVKKVERSL-D--GQVTE-----IIYKGQHN-HELP----- 65  |
| AtWRKY4-NTD_At1g13960_NTD      | WRKYGKQVKGS-EFP-----RSYKCTNP---GCPVKKVERSL-D--GQVTE-----IIYKGQHN-HEPP----- 65  |
| CsSPF1_NTD                     | WRKYGKLVKGS-EFP-----RSYKCTHL---NCPVKKIEGLP-D--GEITE-----IIYKGQHN-HEPP----- 65  |
| AtWRKY58-NTD_At3g01080_NTD     | WRKYGKPIKGC-EYP-----RSYKCTHV---NCPVKKVERSS-D--GQITQ-----IIYKGQHD-HERP----- 65  |
| AtWRKY19-NTD_At4g12020_NTD     | WRKYGKQVKGS-KFP-----LSYKCTYL---GCPVKKVERSL-D--GQVAE-----IVYKDRHN-HEPP----- 65  |
| OsWRKY4-NTD                    | WRKYGKQVKGS-ESP-----RSYKCTRD---GCPVKKVERSS-D--GCIKE-----ITYKGRHS-HPRP----- 65  |
| OsWRKY82-NTD                   | WRKYGKQVKSS-ENS-----RSYRCTNS---NCLAKKVEHCPD---GRVVE-----IIYRGTHN-HEPP----- 65  |
| AtWRKY32-NTD_At4g30930_NTD     | WRKYGKQVKSP-KGS-----RSYRCTYT---ECCAK-IECSNDS--GNVVE-----IVNKGLEHT-HEPP----- 65 |
| AtWRKY1-NTD_ZAP1_At2g04880_NTD | WRKYGKLVKGN-EFV-----RSYRCTHP---NCKAKQLERSA-G--GQVVD-----TVYFGEHD-HPKP----- 65  |
| CocSub_NTD                     | WRKYGKQVKGS-PYP-----RSYKCSQQ---NCQVKKIVERNPEN--GEVSK-----SASKGVHN-HAKP----- 61 |
| ChvWRKY1-NTD_Chlorella_variabi | WRKYGKQVKGS-PFP-----RSYKCSHP---GCPAKMIEREPKT--GRISQ-----AELKNEHN-HAKP----- 63  |
| OsWRKY17                       | WRKYGKSIKNS-PNP-----RSYRCTNP---RCNAKQVERAVDE--PDTLI-----VTYEGLEHL-HYTY----- 66 |
| AtWRKY49_At5g43290             | WRKYGKSIKNS-PNP-----RSYKCTNP---ICNAKQVERSIDE--SNTYI-----ITYEGFHF-HYTY----- 66  |
| AtWRKY59_At2g21900             | WRKYGKPKITGS-PFP-----RHYKCSPP---DCNVKKIERDTNN--PDYIL-----TTYEGRHN-HPSP----- 66 |
| OstISS1_Ostreococcus_tauri_WRK | WRKYGKNIKGS-RHPR-----SYRCTER---GCPAKKTELASDESDEDEGDR-MRVTYEGVHT-HPKP----- 72   |
| OstWRKYputative_Ostreococcus_t | WRKYGKNIKGS-SFPR-----SYRCTER---GCPAKKTELRRASEDGEMET---VVCYEGEHT-HAKP----- 69   |
| MICPUN_61119                   | WRKYGKNVRGR-KVG-----YFKCAHR---GCEAKK-VWRQANGDEAVER-----EGTHT-HAAG----- 62      |
| Glaublia_WRKY-CTD_XM_765980    | WRKYGKPKQTD-RLDSK-----SYRCAFF---NCPARTITFFYSLSSDGTETVESVIQYENQHT-HPPD----- 74  |
| OsWRKY60                       | WRKYGKFIKNI-QKN-----RSYFRCRDQ---RCGAKKVEWHPHDPGLNLR-----VVYDGAHH-HGSP----- 67  |
| Glaublia_WRKY-NTD_XM_765980    | WRKYGKRLPNN-SHP-----KSYFRCSVP---GCQAKRYVTETDNR---VLK-----TEYIGEHN-HGKS----- 64 |
| PpWRKY32                       | WRKYGNLAKGN-LCP-----RGLLPLYCG---ALLSPQAGFCDNVQRCADHKS-VLITTYEGTHN-HPIP----- 72 |
| Tetrapisispora                 | EKYGVLAEYI-LED-----EELLALYHS---GLL----- 38                                     |

Supplementary Figure 4|

AtWRKY1 cDBD SRIVVHTQTLFDIVNDGYRWRKYGOKSVKGSYPYRSYYRCS-PCPVKKhVERSSSHDTKLLITTYEGKHDDMPPG

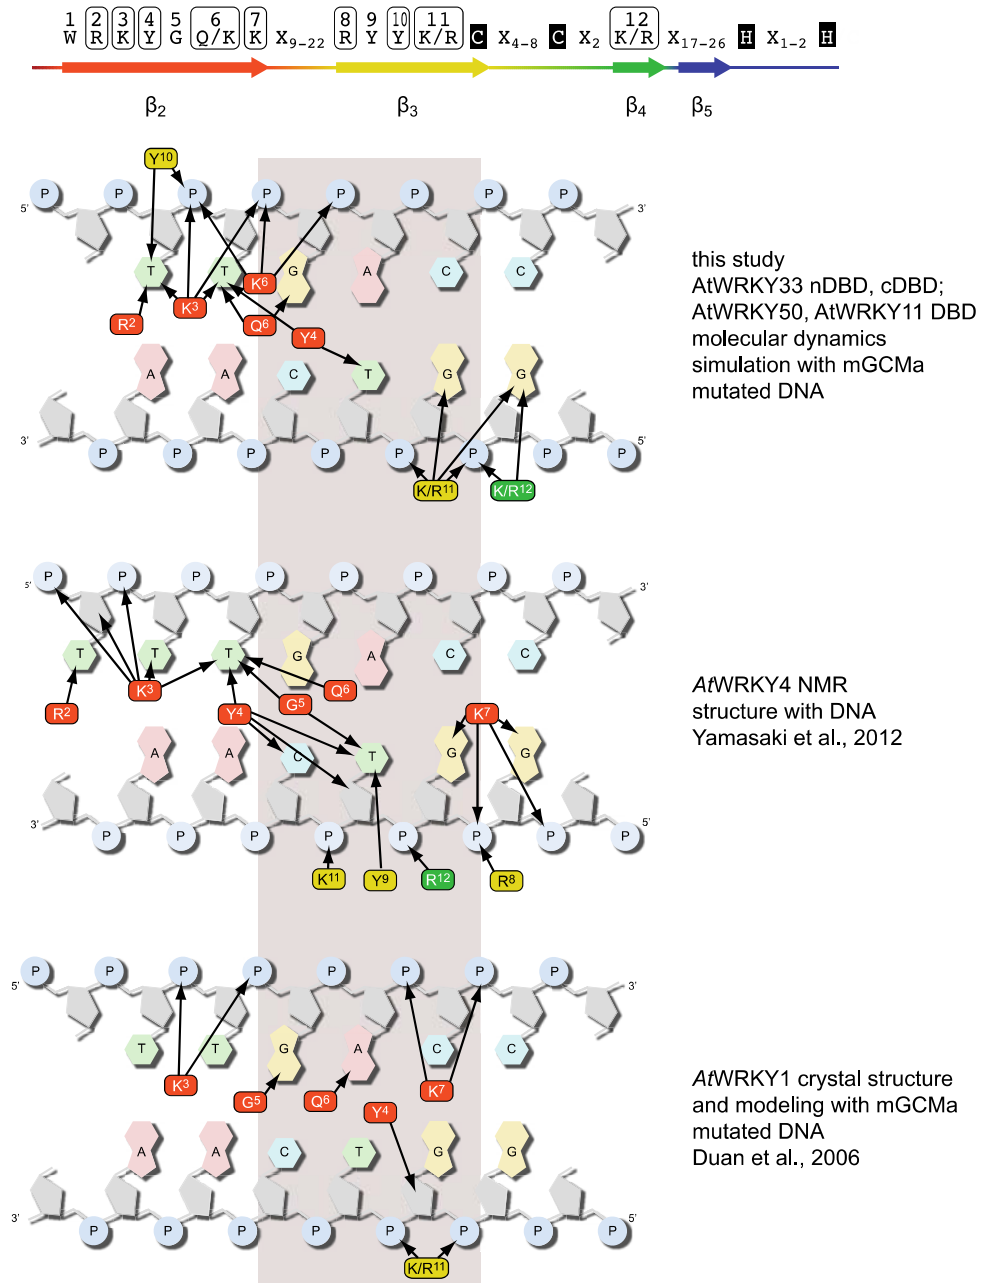

**Supplementary Figure 4|** Comparison of models for WRKY DBD-DNA interaction sites.
